# Supplementary material for: Characterization of the immune cell function landscape in head and neck squamous carcinoma to assist in prognosis prediction and immunotherapy
Source: publisher site journal article supplement (doi:10.18632/aging.205201), 2023-11-10
Supplement: Supplementary file [file aging-v15i21-205201-supplementary-material-SD3.pdf]

## SUPPLEMENTARY TABLES

Supplementary Table 2. qRT-PCR primer sequences.

|         |         |                          |
|---------|---------|--------------------------|
| CCL2    | Forward | GATCTCAGTGCAGAGGCTCG     |
|         | Reverse | TCTCCTTGGCCACAATGGTC     |
| CD19    | Forward | CTCCCATAACCTCCCTGGTCA    |
|         | Reverse | GCCCATGACCCACATCTCTC     |
| CTSG    | Forward | GAGTCAGACGGAATCGAAACG    |
|         | Reverse | CGGAGTGTATCTGTTCCCCTC    |
| RBP5    | Forward | CTGGCGTCCCAAATGAAAGA     |
|         | Reverse | GAGAGCGGAGATTGGTTGTTCT   |
| ROBO1   | Forward | TCCACACAGCAATAGCGAAG     |
|         | Reverse | CCTGTAACATGGGCTGGAGT     |
| STC2    | Forward | ATGCTACCTCAAGCACGACC     |
|         | Reverse | TCTGCTCACACTGAACC        |
| TNFSFR4 | Forward | ATGGAAGGGGAAGGGGTTCAACC  |
|         | Reverse | TCACAGTGGTACTTGGTTCACAG  |
| ZAP70   | Forward | GTTGACTCATCCTCAGAGACGAAT |
|         | Reverse | AGGTTATCGCGCTTCAGGAA     |
| CD247   | Forward | GGCACAGTTGCCGATTACAGA    |
|         | Reverse | CTGCTGAACTTCACTCTCAGG    |

Supplementary Table 4. Clinicopathological features of the training set and the test set.

| Total          | train set (TCGA-HNSC) | test set (GSE65858) | <i>P</i> -value (Chi-Square Test) |
|----------------|-----------------------|---------------------|-----------------------------------|
|                | 499                   | 270                 |                                   |
| <b>Age</b>     |                       |                     |                                   |
| ≤65            | 324                   | 86                  | <b>&lt;0.001</b>                  |
| >65            | 175                   | 184                 |                                   |
| <b>Gender</b>  |                       |                     |                                   |
| Female         | 133                   | 47                  | <b>0.004</b>                      |
| Male           | 366                   | 223                 |                                   |
| <b>T stage</b> |                       |                     |                                   |
| T0-1           | 46                    | 35                  | 0.728                             |
| T2             | 131                   | 80                  |                                   |
| T3             | 96                    | 58                  |                                   |
| T4             | 171                   | 97                  |                                   |
| Unknown        | 55                    | 0                   |                                   |
| <b>N stage</b> |                       |                     |                                   |
| N0             | 170                   | 94                  | <b>0.015</b>                      |
| N1             | 65                    | 32                  |                                   |
| N2-3           | 171                   | 144                 |                                   |
| Nx             | 93                    | 0                   |                                   |
| <b>M stage</b> |                       |                     |                                   |
| M0             | 185                   | 263                 | 0.201                             |

|                   |     |     |       |
|-------------------|-----|-----|-------|
| M1                | 1   | 7   |       |
| Mx                | 313 | 0   |       |
| <b>NCCN stage</b> |     |     |       |
| I                 | 25  | 18  |       |
| II                | 69  | 37  |       |
| III               | 78  | 37  | 0.302 |
| IV                | 259 | 178 |       |
| Unknown           | 68  | 0   |       |
| <b>Grade</b>      |     |     |       |
| G1                | 61  | NA  |       |
| G2                | 298 | NA  |       |
| G3                | 119 | NA  | NA    |
| G4                | 2   | NA  |       |
| Unknown           | 19  | NA  |       |

**Supplementary Table 6. Comparisons of somatic variances between high- and low- risk groups.**

| Gene    | Low-mutation (%) | Low-wild (%) | High-mutation (%) | High-wild (%) | P-value (chi-square test) |
|---------|------------------|--------------|-------------------|---------------|---------------------------|
| TP53    | 134 (54.7)       | 111 (45.3)   | 173 (70)          | 74 (30)       | <0.001                    |
| TNN     | 81 (33.1)        | 164 (66.9)   | 91 (36.8)         | 156 (63.2)    | 0.379                     |
| FAT1    | 49 (20)          | 196 (80)     | 54 (21.9)         | 193 (78.1)    | 0.612                     |
| CDKN2A  | 44 (18)          | 201 (82)     | 44 (17.8)         | 203 (82.2)    | 0.966                     |
| MUC16   | 42 (17.1)        | 203 (82.9)   | 40 (16.2)         | 207 (83.8)    | 0.778                     |
| CSMD3   | 42 (17.1)        | 203 (82.9)   | 40 (16.2)         | 207 (83.8)    | 0.778                     |
| PIK3CA  | 39 (15.9)        | 206 (84.1)   | 40 (16.2)         | 207 (83.8)    | 0.934                     |
| NOTCH1  | 39 (15.9)        | 206 (84.1)   | 37 (15)           | 210 (85)      | 0.773                     |
| SYNE1   | 39 (15.9)        | 206 (84.1)   | 35 (14.2)         | 212 (85.8)    | 0.588                     |
| LRP1B   | 32 (13.1)        | 213 (86.9)   | 35 (14.2)         | 212 (85.8)    | 0.72                      |
| KMT2D   | 20 (8.2)         | 225 (91.8)   | 42 (17)           | 205 (83)      | 0.003                     |
| PCLO    | 27 (11)          | 218 (89)     | 32 (13)           | 215 (87)      | 0.509                     |
| NSD1    | 34 (13.9)        | 211 (86.1)   | 20 (8.1)          | 227 (91.9)    | 0.04                      |
| DNAH5   | 27 (11)          | 218 (89)     | 27 (10.9)         | 220 (89.1)    | 0.975                     |
| USH2A   | 29 (11.8)        | 216 (88.2)   | 22 (8.9)          | 225 (91.1)    | 0.286                     |
| FLG     | 22 (9)           | 223 (91)     | 27 (10.9)         | 220 (89.1)    | 0.47                      |
| CASP8   | 27 (11)          | 218 (89)     | 20 (8.1)          | 227 (91.9)    | 0.27                      |
| RYR2    | 20 (8.2)         | 225 (91.8)   | 22 (8.9)          | 225 (91.1)    | 0.768                     |
| PKHD1L1 | 17 (6.9)         | 228 (93.1)   | 25 (10.1)         | 222 (89.9)    | 0.207                     |
| XIRP2   | 25 (10.2)        | 220 (89.8)   | 15 (6.1)          | 232 (93.9)    | 0.094                     |

**Supplementary Table 7. Molecular docking results of the top 10 compounds.**

| Rank | ZINC ID           | Compound name | Binding energy (kcal/mol) |
|------|-------------------|---------------|---------------------------|
| 1    | ZINC000011679756  | Eltrombopag   | -8.3                      |
| 2    | ZINC0000116473771 | none          | -8                        |
| 3    | ZINC000012503187  | Conivaptan    | -7.8                      |

|    |                  |              |      |
|----|------------------|--------------|------|
| 4  | ZINC000003784182 | Differin     | -7.6 |
| 5  | ZINC000052955754 | Ergotamine   | -7.5 |
| 6  | ZINC000003945984 | Vexol        | -7.5 |
| 7  | ZINC000003795819 | Palonosetron | -7.4 |
| 8  | ZINC000084668739 | Lifitegrast  | -7.4 |
| 9  | ZINC000003875484 | Androxy      | -7.3 |
| 10 | ZINC000064033452 | Lumacaftor   | -7.3 |

---
