# Supplementary material for: Characterization of the immune cell function landscape in head and neck squamous carcinoma to assist in prognosis prediction and immunotherapy
Source: Aging (Albany NY). 2023 Nov 10;15(21):12588–617. doi: 10.18632/aging.205201 (PMC10683602; doi:10.18632/aging.205201)
Supplement: Supplementary Tables 1, 3, 5 and 8 [file aging-15-205201-s004.xlsx]

## Sheet: Supplementary Table 1
Supplementary Table 1. 29 immune gene signatures (gene sets).
aDCs	APC co inhibition	APC co stimulation	B cells	CCR	CD8+ T cells	Check-point	Cytolytic activity	DCs	HLA	iDCs	Inflammation-promoting	Macrophages	Mast cells	MHC class I	Neutrophils	NK cells	Parainflammation	pDCs	T cell co-inhibition	T cell co-stimulation	T helper cells	Tfh	Th1 cells	Th2 cells	TIL	Treg	Type I IFN Reponse	Type II IFN Reponse
CD83	C10orf54	CD40	BACH2	CCL16	CD8A	IDO1	PRF1	CCL17	HLA-E	CD1A	CCL5	C11orf45	CMA1	B2M	EVI2B	KLRC1	CXCL10	CLEC4C	BTLA	CD2	CD4	PDCD1	IFNG	PMCH	ITM2C	IL12RB2	DDX4	GPR146
LAMP3	CD274	CD58	BANK1	TPO		LAG3	GZMA	CCL22	HLA-DPB2	CD1E	CD19	CD68	MS4A2	HLA-A	HSD17B11	KLRF1	PLAT	CXCR3	C10orf54	CD226		CXCL13	TBX21	LAIR2	CD38	TMPRSS6	IFIT1	SELP
CCL1	LGALS9	CD70	BLK	TGFBR2		CTLA4		CD209	HLA-C		CD8B	CLEC5A	TPSAB1	TAP1	KDM6B		CCND1	GZMB	CD160	CD27		CXCR5	CTLA4	SMAD2	THEMIS2	CTSC	IFIT2	AHR
	PDCD1LG2	ICOSLG	BTLA	CXCL2		TNFRSF9		CCL13	HLA-J		CXCL10	CYBB			MEGF9		LGMN	IL3RA	CD244	CD28			STAT4	CXCR6	GLYR1	LAPTM4B	IFIT3
	PVRL3	SLAMF1	CD79A	CCL14		ICOS			HLA-DQB1		CXCL13	FUCA1			MNDA		PLAUR	IRF7	CD274	CD40LG			CD38	GATA3	ICOS	TFRC	IRF7
		TNFSF14	CD79B	TGFBR3		CD80			HLA-DQB2		CXCL9	GPNMB			NLRP12		AIM2	IRF8	CTLA4	ICOS			IL12RB2	IL26	F5	RNF145	ISG20
		TNFSF15	FCRL1	IL11RA		PDCD1LG2			HLA-DQA2		GNLY	HS3ST2			PADI4		MMP7	LILRA4	HAVCR2	SLAMF1			LTA		TIGIT	NETO2	MX1
		TNFSF18	FCRL3	CCL11		TIGIT			HLA-DQA1		GZMB	LGMN			SELL		ICAM1	PHEX	LAG3	TNFRSF18			CSF2		KLRD1	ADAT2	MX2
		TNFSF4	HVCN1	IL4I1		CD70			HLA-A		IFNG	MMP9			TRANK1		MX2	PLD4	LAIR1	TNFRSF25					IRF4	CHST2	RSAD2
		TNFSF8	RALGPS2	IL33		TNFSF9			HLA-DMA		IL12A	TM4SF19			VNN3		CXCL9	PTCRA	TIGIT	TNFRSF4					PRKCQ	CTLA4	TNFSF10
		TNFSF9		CXCL12		ICOSLG			HLA-DOB		IL12B						ANXA1			TNFRSF8					FCRL5	NFE2L3
				CXCL10		KIR3DL1			HLA-DRB1		IRF1						TLR2			TNFRSF9					SIRPG	LIMA1
				BMPER		CD86			HLA-H		PRF1						PLA2G2D			TNFSF14					LPXN	IL1R2
				BMP8A		PDCD1			HLA-B		STAT1						ITGA2								IL2RG	ICOS
				CXCL11		LAIR1			HLA-DRB5		TBX21						MX1								CCL5	HSDL2
				IL21R		TNFRSF8			HLA-DOA								HMOX1								LCK	HTATIP2
				IL17B		TNFSF15			HLA-DPB1								CD276								TRAF3IP3	FKBP1A
				TNFRSF9		TNFRSF14			HLA-DRA								TIRAP								CD86	TIGIT
				ILF2		IDO2			HLA-DRB6								IL33								MAL	CCR8
				CX3CR1		CD276			HLA-L								PTGES								LILRB1	LTA
				CCR8		CD40			HLA-F								TNFRSF12A								DOK2	SLC35F2
				TNFSF12		TNFRSF4			HLA-G								SCARB1								CD6	IL21R
				CSF3		TNFSF14			HLA-DMB								CD14								PAG1	AHCYL1
				TNFSF4		HHLA2			HLA-DPA1								BLNK								LAX1	SOCS2
				BMP3		CD244											IFIT3								PLEK	ETV7
				CX3CL1		CD274											RETNLB								PIK3CD	BCL2L1
				BMP5		HAVCR2											IFIT2								SLAMF1	RRAGB
				CXCR2		CD27											ISG15								XCL1	ACSL4
				TNFRSF10D		BTLA											OAS2								GPR171	CHRNA6
				BMP2		LGALS9											REL								XCL2	BATF
				CXCL14		TMIGD2											OAS3								TBX21	LAX1
				CCL28		CD28											CD44								CD2	ADPRH
				CXCL3		CD48											PPARG								CD53	TNFRSF4
				BMP6		TNFRSF25											BST2								KLHL6	ANKRD10
				CCL21		CD40LG											OAS1								SLAMF6	CD274
				CXCL9		ADORA2A											NOX1								CD40	CASP1
				CCL23		VTCN1											PLA2G2A								SIT1	LY75
				IL6		CD160											IFIT1								TNFRSF4	NPTN
				TNFRSF18		CD44											IFITM3								CD79A	SSTR3
				IL17RD		TNFSF18											IL1RN								CD247	GRSF1
				IL17D		TNFRSF18																			LCP2	CSF2RB
				IL27		BTNL2																			CD3D	TMEM184C
				CCL7		C10orf54																			CD27	NDFIP2
				IL1R1		CD200R1																			SH2D1A	ZBTB38
				CXCR4		TNFSF4																			FYB	ERI1
				CXCR2P1		CD200																			ARHGAP30	TRAF3
				TGFB1I1		NRP1																			ACAP1	NAB1
				IFNGR1																					CST7	HS3ST3B1
				IL9R																					CD3G	LAYN
				IL1RAPL1																					IL2RB	JAK1
				IL11																					CD3E	VDR
				CSF1																					FCRL3	LEPROT
				IL20RA																					CORO1A	GCNT1
				IL25																					ITK	PTPRJ
				TNFRSF4																					TCL1A	IKZF2
				IL18																					CYBB	CSF1
				ILF3																					CSF2RB	ENTPD1
				CCL20																					IKZF1	TNFRSF18
				TNFRSF12A																					NCF4	METTL7A
				IL6ST																					DOCK2	KSR1
				CXCL13																					CCR2	SSH1
				IL12B																					PTPRC	CADM1
				TNFRSF8																					PLAC8	IL1R1
				IL6R																					NCKAP1L	ACP5
				BMPR2																					IL7R	CHST7
				IFNE																					2018-09-06	THADA
				IL1RAPL2																					CD28	CD177
				IL3RA																					STAT4	NFAT5
				BMP4																					CD8A	ZNF282
				CCL24																					LY9	MAGEH1
				TNFSF13B																					CD48
				CCR4																					HCST
				IL2RA																					PTPRCAP
				IL32																					SASH3
				TNFRSF10C																					ARHGAP25
				IL22RA1																					LAT
				BMPR1A																					TRAT1
				CXCR5																					IL10RA
				CXCR3																					PAX5
				IFNA8																					CCR7
				IL17REL																					DOCK11
				IFNB1																					PARVG
				IFNAR1																					SPNS1
				TNFRSF1B																					CD52
				CCL17																					HCLS1
				IFNL1																					ARHGAP9
				IL16																					GIMAP6
				IL1RL1																					PRKCB
				ILK																					MS4A1
				CCL25																					GPR18
				ILDR2																					TBC1D10C
				CXCR1																					GVINP1
				IL36RN																					P2RY8
				IL34																					EVI2B
				TGFB1																					VAMP5
				IFNG																					KLRK1
				IL19																					SELL
				ILKAP																					MPEG1
				BMP2K																					MS4A6A
				CCR10																					ARHGAP15
				ILDR1																					MFNG
				EPO																					GZMK
				CCR7																					SELPLG
				IL17C																					TARP
				IL23A																					GIMAP7
				CCR5																					FAM65B
				IL7																					INPP5D
				EPOR																					ITGA4
				CCL13																					MZB1
				IL2RG																					GPSM3
				IL31RA																					STK10
				TNFAIP6																					CLEC2D
				IFNL2																					IL16
				BMP1																					NLRC3
				IL12RB1																					GIMAP5
				TNFAIP8																					GIMAP4
				IL4R																					IFFO1
				TNFRSF6B																					CFH
				TNFAIP8L1																					PVRIG
				TNFRSF10B																					CFHR1
				IFNL3
				CCL5
				CXCL6
				CXCL1
				CCR3
				TNFSF11
				CSF1R
				IL21
				IL1RAP
				IL12RB2
				CCL1
				IL17RA
				CCR1
				IL1RN
				TNFRSF11B
				TNFRSF14
				IL13
				IL2RB
				BMP8B
				CCL2
				IL24
				IL18RAP
				TGFBI
				TNFSF10
				TNFRSF11A
				CXCL5
				IL5RA
				TNFSF9
				IL1RL2
				TNFRSF13C
				IL36G
				IL15RA
				TNFRSF21
				CXCL8
				IL22RA2
				TNFAIP8L2
				IL18R1
				IFNLR1
				CXCR6
				CCL3L3
				TNFRSF1A
				IL17RE
				IFNGR2
				IL17RC
				TNFAIP8L3
				ILVBL
				TGFBRAP1
				CCL4L1
				CSF2RA
				CCRN4L
				CCL26
				TNFAIP1
				CCRL2
				IFNA10
				TNFRSF17
				IFNA13
				IL20
				IL18BP
				CCL3L1
				TNFSF12-TNFSF13
				IL5
				IL23R
				IL26
				TNF
				TGFA
				CSF2
				IL1F10
				CXCL17
				TNFSF13
				IFNA4
				IL37
				IL12A
				IL7R
				IFNA1
				IL1A
				IL4
				IL2
				CCL22
				CSF3R
				IL10
				IFNK
				TGFB2
				IL1R2
				IL1B
				IL17F
				IL27RA
				IL15
				TNFSF8
				IL36B
				XCL1
				CXCL16
				TNFRSF19
				IL3
				CCL3
				IFNA2
				BMPR1B
				IFNA21
				TNFSF18
				CCL8
				IL17RB
				TNFRSF25
				IL22
				IL10RB
				IFNAR2
				CCL18
				IFNA16
				CSF2RB
				IL36A
				TNFAIP3
				IL13RA2
				IL13RA1
				CCR9
				TNFRSF10A
				IFNA7
				IFNW1
				XCL2
				TNFSF14
				CCR2
				BMP15
				BMP10
				CCL15-CCL14
				TGFBR1
				IFNA5
				BMP7
				IFNA14
				IL20RB
				IL10RA
				IFNA17
				CCR6
				TGFB3
				CCL15
				CCL4
				CCL27
				TNFRSF13B
				TNFAIP2
				IL31
				IL17A
				TNFSF15
				CCL19
				IFNA6
				IL9

## Sheet: Supplementary Table 3
Supplementary Table 3. ssGSEA analysis of 29 immune gene signatures in HNSCC samples.
id	aDCs	APC_co_inhibition	APC_co_stimulation	B_cells	CCR	CD8+_T_cells	Check-point	Cytolytic_activity	DCs	HLA	iDCs	Inflammation-promoting	Macrophages	Mast_cells	MHC_class_I	Neutrophils	NK_cells	Parainflammation	pDCs	T_cell_co-inhibition	T_cell_co-stimulation	T_helper_cells	Tfh	Th1_cells	Th2_cells	TIL	Treg	Type_I_IFN_Reponse	Type_II_IFN_Reponse
TCGA-CV-7425-11A-01R-2081-07	0.789876	0.813932	0.697769	0.644675	0.674822	0.850867	0.689185	0.882812	0.752051	0.922154	0.858274	0.817349	0.79379	0.785872	0.995533	0.745728	0.548107	0.86702	0.799949	0.699047	0.748087	0.913609	0.69996	0.734634	0.643434	0.7724	0.814043	0.869755	0.732051
TCGA-CV-6962-11A-01R-1915-07	0.489004	0.740976	0.636368	0.567442	0.62686	0.726705	0.623515	0.766489	0.746398	0.868118	0.742849	0.723126	0.761836	0.719245	0.983779	0.659445	0.58049	0.858824	0.618174	0.588108	0.609354	0.823524	0.55145	0.576366	0.5211	0.669569	0.776366	0.74937	0.738635
TCGA-CV-7255-11A-01R-2016-07	0.786972	0.750795	0.670904	0.578062	0.662753	0.748686	0.656782	0.798983	0.684661	0.867811	0.732939	0.734215	0.739901	0.751852	0.987996	0.705244	0.60908	0.875572	0.626068	0.622997	0.693141	0.826599	0.59565	0.610281	0.633462	0.701835	0.799389	0.814922	0.705398
TCGA-CV-7238-11A-01R-2016-07	0.721454	0.717621	0.652291	0.599875	0.648043	0.74429	0.614462	0.713716	0.764793	0.865186	0.775452	0.624647	0.749892	0.711117	0.968717	0.667303	0.490291	0.819268	0.611555	0.582165	0.632957	0.820754	0.46369	0.522181	0.564711	0.688199	0.773311	0.741212	0.784946
TCGA-CV-7177-11A-01R-2016-07	0.691452	0.828842	0.615155	0.530943	0.635129	0.706757	0.620114	0.774127	0.691225	0.86306	0.697209	0.727672	0.751592	0.690972	0.987811	0.674952	0.575229	0.863894	0.601617	0.603044	0.586953	0.74274	0.564356	0.606382	0.533119	0.65353	0.783686	0.843173	0.738759
TCGA-CV-6959-11A-01R-1915-07	0.775937	0.767605	0.645255	0.622808	0.647591	0.829648	0.645883	0.85443	0.768703	0.909326	0.883164	0.774538	0.773019	0.671314	0.99207	0.718363	0.567731	0.831232	0.702988	0.675388	0.680512	0.906976	0.636402	0.630202	0.581555	0.73728	0.792122	0.808518	0.760243
TCGA-CV-7183-11A-01R-2016-07	0.440518	0.733284	0.654712	0.503506	0.595711	0.751177	0.599751	0.761123	0.697854	0.862207	0.857735	0.661068	0.742494	0.659608	0.977801	0.649341	0.653228	0.794288	0.60446	0.582083	0.602005	0.791175	0.437377	0.513444	0.613752	0.655843	0.764093	0.728104	0.732405
TCGA-CV-7261-11A-01R-2016-07	0.432787	0.69928	0.654951	0.563018	0.617253	0.686987	0.596774	0.696105	0.688794	0.815616	0.768413	0.598369	0.746791	0.670826	0.974908	0.647263	0.59394	0.804018	0.563744	0.585772	0.600468	0.78101	0.499019	0.469947	0.529131	0.660351	0.773723	0.710349	0.756844
TCGA-CV-6935-11A-01R-1915-07	0.459194	0.744756	0.666362	0.53811	0.6518	0.713415	0.647916	0.775785	0.789444	0.857736	0.771306	0.686198	0.768065	0.708177	0.983679	0.69173	0.591009	0.832459	0.624865	0.623466	0.670977	0.869468	0.540072	0.585483	0.54938	0.694426	0.793037	0.708438	0.76707
TCGA-CV-7416-11A-01R-2081-07	0.761536	0.703677	0.649073	0.522567	0.639953	0.673874	0.601408	0.702307	0.717756	0.84974	0.771983	0.601398	0.749945	0.645922	0.9778	0.664004	0.452328	0.789523	0.593757	0.571646	0.623565	0.776233	0.538134	0.50123	0.491961	0.644656	0.778903	0.678349	0.701114
TCGA-CV-7250-11A-01R-2016-07	0.71468	0.816666	0.70256	0.70372	0.663841	0.832088	0.67466	0.858244	0.746628	0.912558	0.772481	0.804453	0.776007	0.715743	0.995254	0.709561	0.605958	0.855395	0.694487	0.691304	0.704062	0.900242	0.710105	0.623776	0.624334	0.768392	0.79267	0.808774	0.738418
TCGA-CV-6936-11A-01R-1915-07	0.719175	0.758004	0.685321	0.550361	0.655588	0.821898	0.664109	0.813077	0.831995	0.900244	0.831479	0.715276	0.812637	0.851041	0.98592	0.710007	0.570175	0.854411	0.721126	0.664333	0.670035	0.92141	0.55475	0.603609	0.568639	0.729002	0.795973	0.761175	0.808048
TCGA-CV-7424-11A-01R-2081-07	0.647731	0.728002	0.64748	0.49825	0.624998	0.701624	0.593599	0.719684	0.740285	0.854532	0.705504	0.639295	0.73032	0.625545	0.977776	0.669668	0.567631	0.843741	0.560482	0.528737	0.582868	0.754328	0.519459	0.49282	0.50774	0.625288	0.766643	0.823308	0.744054
TCGA-CV-6943-11A-01R-1915-07	0.515437	0.72835	0.655019	0.550783	0.637566	0.810793	0.616551	0.823654	0.758455	0.891187	0.801218	0.745801	0.754672	0.681099	0.987293	0.700415	0.555295	0.838468	0.625447	0.6424	0.645843	0.832545	0.606326	0.597222	0.584124	0.698871	0.790603	0.784509	0.721555
TCGA-CV-7423-11A-01R-2081-07	0.733224	0.730613	0.680943	0.595993	0.645975	0.809548	0.634706	0.844197	0.718352	0.910905	0.850945	0.779292	0.75171	0.594522	0.993909	0.695699	0.617759	0.850972	0.683162	0.655297	0.691496	0.844438	0.633711	0.638968	0.603505	0.711935	0.796774	0.744925	0.688732
TCGA-H7-A6C4-11A-21R-A466-07	0.740225	0.714337	0.628966	0.5641	0.641259	0.783399	0.612972	0.792215	0.749944	0.872271	0.850524	0.72102	0.739886	0.723008	0.980957	0.657765	0.37976	0.798327	0.657931	0.623845	0.652178	0.827539	0.573094	0.58205	0.532877	0.694481	0.773875	0.710931	0.740082
TCGA-CV-7097-11A-01R-2016-07	0.740127	0.766178	0.714755	0.667359	0.666773	0.761265	0.665216	0.819682	0.789692	0.888531	0.643156	0.725881	0.791198	0.843647	0.979147	0.766545	0.555949	0.851867	0.688148	0.632037	0.658485	0.910813	0.626783	0.566195	0.460245	0.750253	0.78149	0.782713	0.812027
TCGA-CV-6938-11A-01R-1915-07	0.538096	0.724731	0.64203	0.542747	0.650864	0.62826	0.628652	0.703898	0.797212	0.875117	0.78538	0.625196	0.781814	0.822574	0.979703	0.751886	0.492187	0.834355	0.662761	0.601848	0.620215	0.899658	0.525857	0.520047	0.542635	0.681227	0.795039	0.733854	0.829302
TCGA-CV-7438-11A-01R-2132-07	0.725707	0.74206	0.682316	0.707525	0.66511	0.81003	0.678696	0.845488	0.750571	0.914515	0.846581	0.792591	0.786113	0.67216	0.993141	0.715673	0.630094	0.875857	0.728176	0.666679	0.723961	0.883521	0.740351	0.646818	0.619543	0.764771	0.805252	0.785477	0.734777
TCGA-HD-A6I0-11A-11R-A31N-07	0.753374	0.817321	0.607839	0.653822	0.685258	0.752829	0.66809	0.84586	0.832101	0.911118	0.55048	0.755438	0.803896	0.828726	0.978892	0.758804	0.482007	0.835687	0.789068	0.696305	0.743317	0.909009	0.689293	0.661414	0.632263	0.780166	0.799553	0.726199	0.794077
TCGA-CV-7245-11A-01R-2016-07	0.487068	0.735691	0.664319	0.566843	0.637773	0.665488	0.610306	0.74059	0.778057	0.859422	0.676947	0.641634	0.788388	0.849033	0.974352	0.728044	0.496432	0.808326	0.585655	0.575084	0.58271	0.900725	0.430683	0.533655	0.334136	0.689318	0.761059	0.740678	0.852345
TCGA-H7-A6C5-11A-11R-A30B-07	0.456289	0.720928	0.560287	0.566485	0.609194	0.69827	0.596851	0.727652	0.683563	0.875719	0.5788	0.634033	0.683597	0.698542	0.973759	0.709316	0.618007	0.811138	0.560614	0.562471	0.572716	0.822558	0.581094	0.467808	0.527555	0.666442	0.779239	0.729676	0.772133
TCGA-WA-A7GZ-11A-11R-A34R-07	0.416764	0.687025	0.554714	0.470073	0.559673	0.662846	0.522337	0.660114	0.707963	0.819916	0.776071	0.576746	0.720493	0.649486	0.966818	0.601819	0.424071	0.772386	0.510904	0.504621	0.477304	0.756996	0.394141	0.399855	0.293205	0.599019	0.731929	0.726157	0.719133
TCGA-HD-A6HZ-11A-11R-A31N-07	0.643509	0.707766	0.52515	0.539395	0.607661	0.592608	0.520884	0.747434	0.810599	0.882787	0.78635	0.615891	0.750006	0.788178	0.971784	0.626842	0.577756	0.782675	0.616339	0.542857	0.551784	0.778393	0.487125	0.450521	0.388996	0.610346	0.739193	0.747808	0.725059
TCGA-CV-7242-11A-01R-2016-07	0.681671	0.763695	0.668508	0.631282	0.651496	0.717608	0.642496	0.799139	0.765717	0.885003	0.868418	0.729192	0.756286	0.703417	0.986587	0.669681	0.542223	0.83769	0.649272	0.640149	0.666131	0.861108	0.567984	0.548779	0.532857	0.713903	0.790748	0.737136	0.727306
TCGA-CV-7437-11A-01R-2132-07	0.498416	0.726962	0.660402	0.683229	0.631298	0.694687	0.652399	0.730555	0.690869	0.870264	0.822483	0.697763	0.754566	0.636667	0.975969	0.689582	0.619802	0.828017	0.661153	0.61766	0.672624	0.840067	0.640768	0.582617	0.614442	0.720897	0.783085	0.742626	0.650284
TCGA-CV-7091-11A-01R-2016-07	0.393879	0.778111	0.645928	0.568603	0.611468	0.709146	0.602198	0.729884	0.765211	0.85714	0.59444	0.650685	0.723481	0.815545	0.977788	0.633544	0.452684	0.807168	0.637227	0.591418	0.593309	0.801721	0.460115	0.503569	0.4376	0.67767	0.753291	0.786521	0.856373
TCGA-CV-6933-11A-01R-1915-07	0.551966	0.691077	0.612317	0.577244	0.573933	0.842913	0.563845	0.802431	0.560369	0.877373	0.40636	0.642385	0.672094	0.480528	0.966635	0.625607	0.518277	0.810408	0.562206	0.553492	0.538092	0.773869	0.521245	0.481564	0.4385	0.670316	0.758645	0.780573	0.752274
TCGA-CV-6956-11A-01R-2016-07	0.731165	0.760716	0.675618	0.557144	0.653034	0.71339	0.637701	0.843678	0.74348	0.894437	0.717461	0.734473	0.751423	0.580098	0.993639	0.730699	0.531142	0.840138	0.634666	0.637703	0.676649	0.838847	0.654752	0.604839	0.620106	0.686549	0.78203	0.711524	0.74493
TCGA-CV-7178-11A-01R-2016-07	0.494436	0.669053	0.593282	0.57728	0.609324	0.775572	0.586073	0.720902	0.701047	0.877788	0.789191	0.656756	0.727673	0.688073	0.976663	0.680551	0.557966	0.813666	0.586455	0.53985	0.56928	0.823397	0.548944	0.476364	0.473132	0.654398	0.768046	0.734113	0.757438
TCGA-CV-7103-11A-01R-2016-07	0.539969	0.734931	0.642412	0.552118	0.622164	0.768533	0.61928	0.772483	0.754311	0.865149	0.833928	0.676675	0.758292	0.658552	0.985317	0.649284	0.506849	0.817103	0.652501	0.612868	0.662126	0.853891	0.534096	0.565137	0.526417	0.695326	0.791359	0.769237	0.776847
TCGA-CV-6934-11A-01R-1915-07	0.551809	0.759277	0.610536	0.513152	0.624312	0.79054	0.618468	0.839048	0.61974	0.903547	0.579168	0.73743	0.711294	0.49189	0.994125	0.681767	0.542403	0.849175	0.612254	0.571724	0.581486	0.869163	0.522928	0.566476	0.488657	0.667437	0.773315	0.779755	0.7032
TCGA-CV-6961-11A-01R-1915-07	0.508045	0.742225	0.617172	0.486577	0.624102	0.719514	0.574411	0.699047	0.71465	0.837969	0.755099	0.623971	0.735996	0.625065	0.982576	0.645495	0.50602	0.809174	0.628889	0.57402	0.598711	0.788354	0.555946	0.447947	0.533431	0.640661	0.772565	0.710396	0.744845
TCGA-CV-7434-11A-01R-2132-07	0.529041	0.735218	0.651946	0.621226	0.639478	0.714787	0.634507	0.772416	0.722826	0.879057	0.55897	0.69062	0.726791	0.74032	0.980751	0.699367	0.564254	0.858332	0.621488	0.600781	0.622189	0.862201	0.596994	0.531569	0.567992	0.699143	0.78764	0.773154	0.781838
TCGA-CV-6955-11A-01R-2016-07	0.789057	0.803072	0.679529	0.648592	0.68081	0.850384	0.694118	0.887181	0.750081	0.9121	0.766849	0.80123	0.790467	0.74469	0.996429	0.738648	0.567426	0.888066	0.672557	0.689079	0.712741	0.901411	0.655028	0.674354	0.598177	0.753787	0.812359	0.863757	0.788774
TCGA-CV-6939-11A-01R-1915-07	0.449663	0.717731	0.607065	0.557325	0.600484	0.607677	0.58922	0.726133	0.727309	0.843306	0.53637	0.581305	0.739588	0.776533	0.95945	0.682267	0.525819	0.802113	0.594851	0.528654	0.557027	0.858872	0.461045	0.44411	0.456542	0.657712	0.748607	0.766769	0.811926
TCGA-CV-7235-11A-01R-2016-07	0.537242	0.754498	0.697132	0.653143	0.66633	0.815087	0.688384	0.80187	0.715167	0.905566	0.777063	0.729228	0.826368	0.588045	0.980564	0.773189	0.576225	0.865896	0.753172	0.686864	0.680483	0.971573	0.597511	0.565419	0.643967	0.769608	0.804045	0.78102	0.83242
TCGA-CV-7440-11A-01R-2187-07	0.47408	0.730036	0.600814	0.518706	0.642849	0.673773	0.629044	0.745223	0.683348	0.845282	0.655243	0.628515	0.724199	0.647975	0.979745	0.688119	0.579407	0.848386	0.579152	0.590353	0.624542	0.780858	0.464938	0.542791	0.640089	0.661666	0.796931	0.777957	0.735088
TCGA-CV-7432-11A-01R-2132-07	0.531465	0.691209	0.609887	0.575764	0.59858	0.737886	0.592179	0.760104	0.669745	0.901423	0.523828	0.660341	0.781055	0.441221	0.975724	0.673886	0.586875	0.829428	0.656919	0.590444	0.576187	0.87666	0.500387	0.468574	0.411583	0.676079	0.767561	0.764342	0.772386
TCGA-CV-7406-11A-01R-2081-07	0.730987	0.717347	0.646012	0.611141	0.653039	0.694991	0.612195	0.719414	0.759758	0.838512	0.725537	0.665471	0.725556	0.695643	0.972998	0.657266	0.476782	0.835523	0.591778	0.591184	0.640843	0.763832	0.564846	0.543004	0.573779	0.679169	0.772536	0.754895	0.747415
TCGA-HD-8635-11A-01R-2403-07	0.550669	0.77266	0.68439	0.568716	0.668132	0.830716	0.666977	0.905763	0.767287	0.89441	0.792652	0.779844	0.76435	0.628646	0.995878	0.734076	0.462621	0.839182	0.650699	0.684107	0.733635	0.880065	0.604574	0.668923	0.560836	0.750057	0.809841	0.762514	0.690761
TCGA-CV-7101-11A-01R-2016-07	0.456275	0.71758	0.592416	0.537061	0.60559	0.640864	0.56982	0.662073	0.640912	0.820619	0.698902	0.600108	0.737047	0.502875	0.965098	0.664868	0.571756	0.821536	0.585913	0.533447	0.581685	0.744341	0.507655	0.444786	0.538282	0.633875	0.767962	0.737762	0.745296
TCGA-CV-7252-11A-01R-2016-07	0.525826	0.685728	0.649214	0.542065	0.63592	0.7711	0.604718	0.771935	0.742481	0.873262	0.843365	0.613893	0.744679	0.620126	0.977123	0.677029	0.459502	0.787834	0.569786	0.615156	0.633603	0.828428	0.473926	0.528623	0.61039	0.687767	0.777479	0.666878	0.744254
TCGA-CV-6960-11A-01R-2016-07	0.656498	0.727413	0.627896	0.513165	0.623319	0.65479	0.615747	0.734697	0.759192	0.847828	0.81928	0.604006	0.753823	0.706611	0.977516	0.675808	0.616202	0.805011	0.583453	0.606652	0.625353	0.836941	0.51139	0.454985	0.467779	0.665262	0.789069	0.679639	0.740216
TCGA-CV-7418-01A-11R-2081-07	0.69832	0.755365	0.638957	0.563423	0.618199	0.789421	0.648085	0.869588	0.62387	0.875028	0.577984	0.792036	0.771109	0.49656	0.988859	0.701636	0.455738	0.879716	0.664511	0.629949	0.635739	0.844336	0.618318	0.61445	0.587205	0.695713	0.79292	0.830411	0.731169
TCGA-CQ-A4C6-01A-11R-A24Z-07	0.755551	0.888621	0.663288	0.582515	0.67982	0.739818	0.677502	0.871737	0.774839	0.914289	0.680341	0.801708	0.803001	0.7199	0.998282	0.69416	0.550663	0.878266	0.688967	0.699106	0.699183	0.869545	0.639867	0.735876	0.62316	0.726335	0.813975	0.87998	0.712786
TCGA-CV-6936-01A-11R-1915-07	0.561006	0.733547	0.656791	0.54298	0.639921	0.837272	0.653213	0.854864	0.665873	0.914685	0.564956	0.786421	0.791197	0.549243	0.998282	0.6858	0.417888	0.873011	0.623133	0.664423	0.663999	0.831376	0.632706	0.649924	0.607439	0.709103	0.789459	0.823235	0.693257
TCGA-CV-7428-01A-11R-2132-07	0.761244	0.81497	0.695079	0.593615	0.672385	0.83008	0.682636	0.895256	0.758476	0.92975	0.754538	0.811735	0.806083	0.658784	0.998409	0.702705	0.52325	0.889604	0.693941	0.687688	0.719622	0.889595	0.694555	0.720449	0.649242	0.737961	0.814636	0.881948	0.75298
TCGA-CR-6488-01A-12R-2081-07	0.544955	0.793356	0.661295	0.581382	0.67034	0.733592	0.670699	0.789181	0.743985	0.883175	0.781063	0.706124	0.858134	0.732427	0.98793	0.747642	0.424728	0.863555	0.675969	0.692808	0.700942	0.942248	0.649441	0.646263	0.592169	0.737638	0.8123	0.775991	0.755346
TCGA-P3-A5QE-01A-11R-A28V-07	0.771721	0.844251	0.726564	0.680556	0.654341	0.90014	0.723826	0.879171	0.605369	0.934976	0.749652	0.828796	0.735155	0.294115	0.997842	0.713055	0.550632	0.829099	0.641687	0.706812	0.771319	0.924358	0.733589	0.658533	0.641953	0.784053	0.822426	0.838518	0.690115
TCGA-CN-5360-01A-01R-1436-07	0.748145	0.862295	0.701178	0.695797	0.671348	0.885224	0.724506	0.899497	0.834245	0.915983	0.730419	0.819283	0.824245	0.695346	0.997249	0.760538	0.536272	0.887455	0.740997	0.71352	0.744807	0.960976	0.742329	0.671789	0.634073	0.801774	0.833181	0.817965	0.803567
TCGA-CV-5966-01A-11R-1686-07	0.759135	0.889455	0.724194	0.501165	0.660658	0.77298	0.709024	0.902087	0.780898	0.921872	0.357764	0.797792	0.782229	0.470841	0.999662	0.67842	0.565152	0.887469	0.703931	0.72894	0.681314	0.895211	0.662021	0.724441	0.636874	0.724127	0.811608	0.870898	0.640151
TCGA-CV-7247-01A-11R-2016-07	0.72867	0.695698	0.645023	0.526712	0.627317	0.486336	0.598722	0.68764	0.61266	0.813207	0.543351	0.651504	0.758646	0.552196	0.988815	0.647965	0.445185	0.849256	0.575728	0.53539	0.554994	0.724622	0.5383	0.579513	0.547833	0.626253	0.775289	0.710502	0.812547
TCGA-CN-5365-01A-01R-1436-07	0.796875	0.85264	0.704012	0.513011	0.649832	0.798265	0.660145	0.863287	0.741379	0.922604	0.769654	0.779679	0.832766	0.480466	0.996186	0.679881	0.491882	0.876534	0.681969	0.690649	0.659419	0.90258	0.645509	0.685898	0.533305	0.706835	0.784628	0.835018	0.7115
TCGA-CV-5970-01A-11R-1686-07	0.733137	0.763236	0.663831	0.6003	0.660289	0.695551	0.653682	0.77319	0.782064	0.900292	0.785626	0.743944	0.818089	0.631833	0.992909	0.734035	0.409514	0.864184	0.628713	0.639671	0.668796	0.860905	0.592235	0.668443	0.59733	0.695295	0.809965	0.825281	0.739075
TCGA-CR-7377-01A-11R-2016-07	0.792793	0.840315	0.712982	0.714152	0.68521	0.910229	0.70824	0.925555	0.793905	0.935394	0.80485	0.831364	0.821716	0.776541	0.996811	0.741768	0.595872	0.897177	0.790466	0.727157	0.738256	0.958282	0.756575	0.684343	0.624021	0.800554	0.827218	0.868821	0.804812
TCGA-CN-4728-01A-01R-1436-07	0.624713	0.864506	0.729442	0.64635	0.678523	0.77021	0.717217	0.795358	0.893928	0.926537	0.74489	0.777527	0.88465	0.688831	0.995375	0.751392	0.483061	0.887403	0.696072	0.722692	0.75567	0.977062	0.691641	0.671106	0.620165	0.778997	0.834095	0.830875	0.798547
TCGA-P3-A6SX-01A-11R-A34R-07	0.492893	0.670347	0.559321	0.492463	0.595881	0.63319	0.555784	0.662356	0.619967	0.770895	0.537282	0.620551	0.756285	0.5735	0.985363	0.668062	0.348162	0.812185	0.510596	0.525675	0.559722	0.665361	0.591537	0.493005	0.412696	0.602978	0.75258	0.766158	0.675217
TCGA-P3-A6SW-01A-11R-A34R-07	0.742508	0.89566	0.661218	0.636406	0.639431	0.876203	0.68757	0.90503	0.680673	0.924878	0.589357	0.820262	0.780274	0.673569	0.997893	0.699512	0.579521	0.857329	0.649436	0.698878	0.709416	0.868503	0.68713	0.660267	0.60752	0.756863	0.791986	0.834773	0.723656
TCGA-CN-5373-01A-01R-1436-07	0.589367	0.909355	0.736962	0.643817	0.696855	0.737785	0.731354	0.835726	0.802717	0.913407	0.786201	0.808158	0.829403	0.736562	0.99796	0.766631	0.563184	0.909376	0.778954	0.746698	0.743474	0.941816	0.722135	0.691537	0.591973	0.76728	0.836498	0.885063	0.780658
TCGA-CN-A49A-01A-11R-A24H-07	0.512909	0.648022	0.547123	0.421617	0.559024	0.500363	0.526703	0.557609	0.495851	0.814813	0.432979	0.60114	0.73463	0.311296	0.985019	0.618862	0.379927	0.798322	0.48331	0.491126	0.47389	0.667801	0.450237	0.423582	0.502605	0.551361	0.755507	0.738275	0.695864
TCGA-C9-A480-01A-12R-A24H-07	0.706303	0.757363	0.651137	0.542932	0.630773	0.76373	0.652991	0.834228	0.692011	0.892089	0.80181	0.770203	0.792136	0.569816	0.995439	0.682283	0.512173	0.87082	0.607166	0.642084	0.660785	0.762205	0.622256	0.662528	0.544416	0.672807	0.799207	0.853124	0.678065
TCGA-CN-6021-01A-11R-1686-07	0.751626	0.713968	0.713035	0.677757	0.653442	0.731102	0.663722	0.765918	0.733167	0.853239	0.647942	0.678151	0.765539	0.561466	0.970168	0.762925	0.389839	0.807917	0.622324	0.61734	0.668639	0.827107	0.685396	0.606211	0.610781	0.726388	0.795168	0.718422	0.799674
TCGA-CR-6470-01A-11R-1873-07	0.796551	0.855595	0.740829	0.762166	0.675434	0.931473	0.747159	0.931997	0.746553	0.922791	0.775135	0.849569	0.762297	0.733401	0.996293	0.760446	0.59102	0.870776	0.738858	0.749319	0.779101	0.962577	0.799507	0.707075	0.667144	0.825809	0.838702	0.805061	0.795903
TCGA-BA-6868-01B-12R-1915-07	0.583102	0.61647	0.624677	0.509189	0.622905	0.623559	0.576738	0.71608	0.602698	0.82428	0.545842	0.656919	0.743941	0.345758	0.99274	0.70324	0.367054	0.863854	0.519365	0.523423	0.585151	0.686224	0.483806	0.629775	0.437859	0.626313	0.786057	0.843597	0.659844
TCGA-CV-A45Y-01A-11R-A24Z-07	0.779013	0.840955	0.727611	0.691113	0.68359	0.792877	0.714953	0.866576	0.875087	0.935537	0.776466	0.80677	0.823928	0.638719	0.99518	0.727576	0.493998	0.874834	0.664942	0.708908	0.762742	0.927331	0.735072	0.725226	0.662715	0.783226	0.827729	0.821557	0.75296
TCGA-UF-A7JA-01A-12R-A34R-07	0.555486	0.64297	0.608608	0.468007	0.594351	0.652833	0.565935	0.681083	0.620259	0.876069	0.61613	0.677948	0.776504	0.39776	0.993155	0.637097	0.0831296	0.808522	0.53855	0.511357	0.593658	0.856915	0.596689	0.57728	0.471415	0.588502	0.765946	0.734983	0.696006
TCGA-HD-A6HZ-01A-12R-A31N-07	0.765585	0.803238	0.66159	0.670067	0.695467	0.739335	0.689481	0.847029	0.911862	0.906987	0.718923	0.797989	0.817735	0.65897	0.9955	0.738173	0.543944	0.877416	0.673174	0.695768	0.729551	0.926772	0.689451	0.736138	0.646549	0.773025	0.829192	0.789181	0.786294
TCGA-CV-7411-01A-11R-2081-07	0.699616	0.736799	0.657461	0.618904	0.648556	0.74213	0.63731	0.769332	0.783174	0.873467	0.704863	0.717085	0.789929	0.617411	0.991083	0.725529	0.362142	0.857489	0.622713	0.638375	0.65596	0.824845	0.681569	0.602697	0.461346	0.693379	0.801494	0.763613	0.7397
TCGA-BA-6870-01A-11R-1873-07	0.555844	0.716213	0.660235	0.704746	0.668825	0.66742	0.658261	0.782946	0.756521	0.900365	0.790629	0.709745	0.760952	0.736816	0.994809	0.735559	0.520797	0.852383	0.709091	0.636778	0.711511	0.826548	0.702031	0.65279	0.596904	0.747503	0.804036	0.806802	0.774191
TCGA-CV-7091-01A-11R-2016-07	0.711269	0.767473	0.67617	0.564954	0.659768	0.771252	0.650344	0.812686	0.694997	0.887533	0.701384	0.762882	0.810466	0.633088	0.996869	0.698907	0.500235	0.865626	0.67916	0.63321	0.696768	0.867563	0.628219	0.672249	0.586351	0.703134	0.818712	0.798084	0.727944
TCGA-CR-7379-01A-11R-2016-07	0.498808	0.763488	0.673676	0.549183	0.666881	0.669097	0.66515	0.736279	0.758123	0.869663	0.621574	0.690087	0.816998	0.701029	0.985686	0.748214	0.44248	0.841693	0.620105	0.628221	0.67149	0.871705	0.542644	0.652968	0.502645	0.699358	0.81156	0.746962	0.755798
TCGA-CV-7100-01A-11R-2016-07	0.560665	0.85476	0.710506	0.546405	0.638131	0.831046	0.690102	0.898481	0.681243	0.894884	0.650129	0.827772	0.798994	0.594513	0.999002	0.705179	0.540556	0.877792	0.677726	0.67148	0.696428	0.884334	0.660179	0.704987	0.617123	0.725234	0.805087	0.85656	0.705076
TCGA-CQ-5324-01A-01R-1686-07	0.495212	0.800845	0.675584	0.598656	0.657142	0.794453	0.679605	0.89216	0.749358	0.873179	0.625907	0.810529	0.794752	0.67595	0.996497	0.710483	0.586876	0.88478	0.671529	0.689054	0.67151	0.861743	0.69062	0.712247	0.556039	0.719144	0.813905	0.808932	0.749141
TCGA-CQ-6222-01A-11R-1915-07	0.720347	0.906268	0.708543	0.609527	0.677387	0.880243	0.716285	0.898279	0.848857	0.928235	0.807445	0.818977	0.84876	0.652855	0.995762	0.731852	0.510936	0.887989	0.705968	0.745153	0.729437	0.959909	0.703252	0.701048	0.629282	0.775352	0.809328	0.81275	0.767584
TCGA-CV-7424-01A-11R-2081-07	0.709165	0.798704	0.652659	0.575684	0.59113	0.776589	0.65154	0.87927	0.642635	0.884159	0.48462	0.760262	0.800976	0.642456	0.991637	0.696056	0.395045	0.844887	0.60218	0.632602	0.671439	0.855619	0.569146	0.587745	0.565376	0.705195	0.792238	0.783993	0.706553
TCGA-CV-7103-01A-21R-2016-07	0.536948	0.729252	0.640286	0.560239	0.612543	0.556243	0.626931	0.637104	0.753748	0.836433	0.744629	0.643513	0.805502	0.714157	0.966977	0.655109	0.372121	0.817518	0.602672	0.605988	0.660864	0.860574	0.539313	0.598274	0.545724	0.666181	0.799185	0.738118	0.744505
TCGA-RS-A6TP-01A-12R-A34R-07	0.72699	0.788079	0.615398	0.486234	0.628134	0.738496	0.621268	0.854339	0.649591	0.874001	0.511156	0.798684	0.705519	0.48235	0.999899	0.64672	0.483637	0.845218	0.626024	0.654958	0.663104	0.767288	0.611362	0.690382	0.582277	0.656674	0.792135	0.807634	0.660176
TCGA-CV-6956-01A-21R-2016-07	0.471736	0.673873	0.610549	0.428612	0.590894	0.339024	0.543024	0.575479	0.59381	0.767862	0.521598	0.586729	0.761684	0.513502	0.989701	0.598804	0.091053	0.834085	0.521601	0.514844	0.490947	0.7341	0.49717	0.482436	0.283546	0.549415	0.76091	0.767812	0.711647
TCGA-BA-A6D8-01A-31R-A31N-07	0.721968	0.710397	0.589957	0.558147	0.611135	0.565239	0.607662	0.789211	0.78656	0.872673	0.588347	0.657756	0.774715	0.639474	0.962388	0.654199	0.343578	0.758671	0.630742	0.567396	0.618414	0.856991	0.604766	0.602946	0.542355	0.65089	0.762098	0.68769	0.636269
TCGA-D6-A6EQ-01A-11R-A31N-07	0.714458	0.769697	0.675951	0.613054	0.662715	0.75908	0.677002	0.858664	0.853081	0.913643	0.824797	0.790567	0.817838	0.697146	0.987814	0.715722	0.533226	0.855384	0.697683	0.674307	0.715451	0.866953	0.695569	0.684155	0.584858	0.730421	0.790843	0.763369	0.694075
TCGA-CN-4736-01A-01R-1436-07	0.793144	0.867109	0.716974	0.576587	0.665634	0.859583	0.721513	0.953844	0.796265	0.935383	0.652968	0.829856	0.848152	0.710471	0.999221	0.711278	0.605709	0.903149	0.696361	0.752781	0.736781	0.9609	0.66086	0.743111	0.490961	0.769201	0.822792	0.87227	0.772261
TCGA-D6-A6EN-01A-11R-A31N-07	0.542783	0.886886	0.700329	0.597658	0.659444	0.931829	0.733761	0.969986	0.77606	0.954531	0.584326	0.85538	0.797681	0.578268	0.997766	0.715453	0.649011	0.871414	0.752388	0.781537	0.732476	0.917268	0.732231	0.779042	0.67612	0.77957	0.812197	0.846511	0.638552
TCGA-TN-A7HI-01A-11R-A34R-07	0.773416	0.774232	0.663254	0.676217	0.635544	0.841922	0.681661	0.891408	0.80369	0.91517	0.454768	0.830217	0.763487	0.637403	0.981249	0.662641	0.558434	0.828056	0.718969	0.69153	0.72478	0.878032	0.64655	0.720156	0.617022	0.756643	0.771679	0.790223	0.58502
TCGA-F7-8489-01A-31R-2403-07	0.602831	0.846735	0.681313	0.648653	0.672043	0.839051	0.706465	0.917268	0.71566	0.949862	0.827251	0.831075	0.82174	0.459404	0.998899	0.734619	0.60706	0.898135	0.75345	0.719467	0.745421	0.91554	0.70409	0.733713	0.571349	0.776407	0.835195	0.848117	0.738607
TCGA-BA-A4IG-01A-11R-A266-07	0.533331	0.726852	0.66728	0.72257	0.644261	0.754582	0.663094	0.821994	0.698832	0.855626	0.65412	0.770754	0.762631	0.454903	0.989472	0.701195	0.542387	0.854207	0.698716	0.640363	0.684645	0.821618	0.716063	0.662437	0.600362	0.736046	0.801926	0.791291	0.719754
TCGA-CV-A45T-01A-11R-A24H-07	0.790657	0.875426	0.678163	0.754475	0.708132	0.846852	0.719353	0.936603	0.81124	0.93205	0.718742	0.86323	0.80542	0.704072	0.997926	0.72178	0.595832	0.892464	0.775969	0.750795	0.779398	0.925832	0.794297	0.774953	0.659903	0.824529	0.823694	0.916083	0.73635
TCGA-CV-A45R-01A-11R-A24H-07	0.780764	0.852311	0.650683	0.5569	0.649674	0.758114	0.678917	0.837361	0.709877	0.888141	0.673592	0.777379	0.804283	0.722387	0.997275	0.722438	0.561731	0.906044	0.675023	0.694069	0.685304	0.874881	0.658117	0.666584	0.526985	0.71974	0.807218	0.84186	0.709322
TCGA-CV-A45Q-01A-11R-A24H-07	0.504709	0.879295	0.609795	0.549901	0.612304	0.712221	0.590569	0.874925	0.697043	0.893788	0.515109	0.72819	0.776853	0.667129	0.988376	0.670419	0.233469	0.823327	0.666566	0.656349	0.61736	0.812267	0.621352	0.59256	0.378114	0.647313	0.7629	0.793309	0.395479
TCGA-HD-8224-01A-11R-2403-07	0.56957	0.757703	0.653667	0.515001	0.608724	0.705893	0.624661	0.765917	0.695998	0.871356	0.576265	0.659585	0.820688	0.628382	0.989717	0.661207	0.444831	0.844126	0.617834	0.599198	0.653043	0.857474	0.48377	0.55532	0.533246	0.670964	0.780354	0.751225	0.751516
TCGA-CV-7446-01A-11R-2232-07	0.743332	0.698542	0.630313	0.545166	0.612786	0.741266	0.626522	0.727408	0.645648	0.873945	0.669115	0.727981	0.788744	0.545039	0.995493	0.707144	0.38331	0.854995	0.560991	0.594367	0.628345	0.797655	0.607888	0.62875	0.565127	0.650732	0.800356	0.799962	0.755692
TCGA-CV-7254-01A-11R-2016-07	0.591821	0.898398	0.717444	0.762796	0.672177	0.801619	0.727742	0.85642	0.878916	0.920441	0.786118	0.825833	0.818748	0.765967	0.9909	0.760969	0.596517	0.872815	0.716239	0.736465	0.741628	0.954826	0.76524	0.682403	0.64233	0.797651	0.822244	0.79435	0.830061
TCGA-CQ-A4C9-01A-11R-A24Z-07	0.676104	0.776804	0.673551	0.55444	0.633829	0.62826	0.628323	0.687795	0.696738	0.833197	0.603811	0.653751	0.80463	0.674027	0.991786	0.669849	0.462114	0.857969	0.610894	0.599977	0.632859	0.780502	0.550102	0.539951	0.529695	0.668117	0.786634	0.838264	0.766025
TCGA-P3-A5QA-01A-11R-A28V-07	0.667543	0.844308	0.606923	0.533135	0.625109	0.63535	0.586735	0.897332	0.564914	0.826168	0.687669	0.704539	0.773204	0.384785	0.99146	0.611113	0.491201	0.845201	0.533984	0.597554	0.546424	0.694178	0.52436	0.681792	0.571281	0.619477	0.793076	0.757589	0.66209
TCGA-CN-A499-01A-11R-A24H-07	0.784295	0.887387	0.734568	0.604115	0.675978	0.881132	0.718693	0.932273	0.751081	0.909903	0.560483	0.848066	0.781752	0.513235	0.999306	0.747473	0.615427	0.88515	0.741135	0.742938	0.742705	0.893483	0.711915	0.783886	0.533685	0.76801	0.830624	0.912523	0.702128
TCGA-F7-A50J-01A-21R-A28V-07	0.542115	0.781995	0.674713	0.590679	0.666418	0.82698	0.662913	0.821278	0.764044	0.878928	0.710596	0.782278	0.803541	0.649744	0.993954	0.702642	0.523419	0.871232	0.65617	0.658099	0.681317	0.790285	0.663347	0.687445	0.52231	0.710556	0.804461	0.816172	0.652797
TCGA-CV-5973-01A-11R-1686-07	0.699974	0.716204	0.575664	0.493132	0.626626	0.45945	0.588275	0.62868	0.774864	0.828897	0.513454	0.589971	0.790505	0.690508	0.977055	0.662516	0.391598	0.857382	0.560755	0.599401	0.613129	0.818467	0.513748	0.570457	0.500998	0.625612	0.779214	0.813436	0.595475
TCGA-CQ-A4CE-01A-11R-A266-07	0.731545	0.751653	0.659644	0.567959	0.662434	0.79768	0.650289	0.843621	0.737784	0.850327	0.703591	0.782966	0.751136	0.637845	0.994854	0.701371	0.414848	0.843353	0.671954	0.643791	0.698801	0.776843	0.655867	0.702101	0.594815	0.707423	0.808323	0.784734	0.742237
TCGA-BA-A4IF-01A-11R-A266-07	0.701698	0.667707	0.634165	0.547019	0.605113	0.550856	0.601009	0.806682	0.63476	0.834913	0.609594	0.663347	0.761442	0.459654	0.994259	0.648927	0.443524	0.841388	0.543997	0.529473	0.583289	0.702742	0.547605	0.594417	0.444736	0.61746	0.77892	0.84919	0.715314
TCGA-BA-4074-01A-01R-1436-07	0.71764	0.775407	0.729027	0.517781	0.668	0.596851	0.644285	0.714905	0.738235	0.848079	0.643502	0.677215	0.785031	0.376346	0.986884	0.682119	0.506641	0.860112	0.602511	0.56194	0.620086	0.739055	0.553523	0.661111	0.582826	0.664236	0.792847	0.80015	0.649625
TCGA-CV-6939-01A-11R-1915-07	0.770553	0.816928	0.679607	0.677412	0.669098	0.827641	0.681811	0.868674	0.729272	0.925437	0.763319	0.792311	0.772077	0.723088	0.996617	0.731112	0.571497	0.881013	0.66141	0.687665	0.700577	0.920444	0.692355	0.665661	0.591492	0.747509	0.826469	0.79463	0.790389
TCGA-CV-6934-01A-11R-1915-07	0.702492	0.805886	0.749513	0.614356	0.680288	0.885198	0.715441	0.920214	0.81686	0.924382	0.660751	0.799847	0.841027	0.762034	0.995722	0.731976	0.541844	0.90198	0.704395	0.701273	0.7298	0.942959	0.657243	0.699629	0.591363	0.771545	0.827582	0.831373	0.80648
TCGA-CN-A498-01A-11R-A24H-07	0.725847	0.761553	0.672683	0.638163	0.662746	0.762307	0.666477	0.816008	0.696077	0.891999	0.703006	0.756724	0.785701	0.483558	0.996565	0.695714	0.556191	0.875124	0.641342	0.664408	0.67481	0.801213	0.656296	0.709933	0.611537	0.705377	0.806513	0.808417	0.752859
TCGA-D6-6824-01A-11R-1915-07	0.732824	0.814112	0.701421	0.650009	0.68795	0.831529	0.713011	0.902766	0.786391	0.920147	0.686595	0.786189	0.843614	0.758925	0.993966	0.777105	0.638746	0.895011	0.743649	0.68615	0.708687	0.955462	0.651507	0.657558	0.654478	0.779794	0.828127	0.813188	0.826023
TCGA-CN-4722-01A-01R-1436-07	0.454239	0.692819	0.719464	0.618052	0.651416	0.726909	0.647092	0.753627	0.739492	0.845141	0.697987	0.660953	0.746628	0.667125	0.977911	0.719637	0.409391	0.810759	0.574345	0.614877	0.670257	0.845531	0.598808	0.586885	0.57838	0.720321	0.794826	0.714177	0.832459
TCGA-CV-6961-01A-21R-1915-07	0.744413	0.725415	0.671344	0.501894	0.653899	0.712526	0.654272	0.754675	0.719942	0.87698	0.600647	0.759235	0.776584	0.4839	0.995958	0.707067	0.545064	0.861181	0.661552	0.610347	0.667309	0.856026	0.561855	0.625336	0.597572	0.669292	0.797666	0.728162	0.775467
TCGA-CR-5243-01A-01R-1514-07	0.746337	0.764376	0.711496	0.659521	0.655513	0.821694	0.687857	0.854151	0.698845	0.90278	0.798195	0.779778	0.762749	0.674918	0.996404	0.695595	0.508742	0.850734	0.633349	0.673359	0.748525	0.914168	0.617005	0.675485	0.642536	0.756026	0.817346	0.820909	0.778155
TCGA-CQ-A4CD-01A-21R-A24Z-07	0.540304	0.79372	0.691325	0.529574	0.647686	0.74335	0.67732	0.834235	0.637774	0.893216	0.5974	0.777828	0.781863	0.282367	0.998374	0.693139	0.477898	0.89006	0.656051	0.674829	0.654859	0.872797	0.64305	0.647561	0.549265	0.683211	0.796983	0.870157	0.641219
TCGA-P3-A5QF-01A-11R-A28V-07	0.527261	0.775873	0.643239	0.520798	0.611473	0.702463	0.629303	0.806538	0.71927	0.855363	0.648338	0.763317	0.776917	0.573385	0.994124	0.660256	0.616023	0.859337	0.647267	0.619201	0.625668	0.825735	0.613257	0.636917	0.513768	0.668578	0.782176	0.807793	0.6642
TCGA-TN-A7HL-01A-11R-A34R-07	0.768059	0.902178	0.713916	0.686602	0.667746	0.932261	0.757035	0.981682	0.757065	0.939352	0.727791	0.896016	0.810118	0.520405	0.997131	0.73877	0.646307	0.887492	0.755366	0.827513	0.76455	0.945653	0.766148	0.78001	0.684064	0.823363	0.806645	0.851987	0.707336
TCGA-IQ-7631-01A-11R-2081-07	0.377151	0.663081	0.54694	0.522021	0.561659	0.519676	0.512285	0.622999	0.55235	0.792442	0.583556	0.538652	0.77646	0.58824	0.963796	0.615839	0.340908	0.79081	0.511807	0.418548	0.488244	0.891958	0.404043	0.295883	0.349529	0.587979	0.744292	0.732077	0.674708
TCGA-CV-7422-01A-21R-2081-07	0.650556	0.856629	0.701662	0.674144	0.645885	0.745713	0.661432	0.808843	0.677107	0.869575	0.609046	0.758445	0.811472	0.63119	0.995071	0.704658	0.42528	0.899836	0.68919	0.660851	0.673441	0.851731	0.684827	0.609053	0.562633	0.712214	0.808931	0.882682	0.756632
TCGA-CV-7568-01A-11R-2232-07	0.480856	0.766804	0.603667	0.517449	0.604323	0.72175	0.602955	0.743309	0.62518	0.864666	0.700485	0.731728	0.776438	0.550548	0.991159	0.68981	0.56533	0.841766	0.594034	0.613027	0.615179	0.804694	0.550972	0.611979	0.573557	0.663482	0.782336	0.80995	0.707613
TCGA-QK-AA3J-01A-11R-A39I-07	0.538224	0.695439	0.637104	0.596521	0.625626	0.687851	0.641663	0.886392	0.695745	0.837053	0.491325	0.721684	0.720537	0.641982	0.993646	0.651505	0.531945	0.840769	0.612331	0.617308	0.663958	0.722716	0.565059	0.638636	0.625153	0.683602	0.789197	0.771922	0.726966
TCGA-CQ-5332-01A-01R-1686-07	0.682067	0.706459	0.654448	0.567932	0.638197	0.664523	0.62636	0.674968	0.791948	0.817788	0.588036	0.678345	0.804719	0.486955	0.965595	0.684805	0.504544	0.794801	0.569517	0.598414	0.641368	0.864081	0.635096	0.644797	0.582278	0.671952	0.802161	0.65479	0.716076
TCGA-BA-6869-01A-11R-1873-07	0.695645	0.748273	0.717822	0.562071	0.647545	0.713415	0.659003	0.806362	0.637229	0.878007	0.475216	0.759911	0.757107	0.577634	0.991643	0.692485	0.508831	0.846563	0.589232	0.585984	0.666806	0.731152	0.601101	0.631175	0.608691	0.667386	0.792356	0.783607	0.746233
TCGA-CR-7402-01A-11R-2016-07	0.72478	0.761536	0.671333	0.613971	0.648437	0.723859	0.680561	0.865046	0.662395	0.929044	0.668167	0.734199	0.747715	0.634675	0.993675	0.685041	0.598162	0.845825	0.620825	0.630429	0.709623	0.816332	0.6398	0.678779	0.582821	0.719286	0.804975	0.75922	0.763691
TCGA-CN-4734-01A-01R-1436-07	0.752385	0.87714	0.691369	0.576031	0.688491	0.901436	0.719676	0.936987	0.802195	0.916312	0.721627	0.823181	0.821948	0.730324	0.998375	0.7285	0.548513	0.874328	0.73555	0.755834	0.747188	0.910407	0.675024	0.714443	0.655332	0.764174	0.825446	0.884006	0.730131
TCGA-HD-7229-01A-11R-2016-07	0.759136	0.904052	0.654697	0.591064	0.669607	0.820678	0.667137	0.912859	0.73107	0.901255	0.523264	0.804066	0.774282	0.489671	0.998765	0.721724	0.60204	0.872932	0.652333	0.690655	0.67792	0.793208	0.656425	0.70783	0.614993	0.721603	0.807489	0.905934	0.784326
TCGA-CQ-6219-01A-11R-1915-07	0.582829	0.846032	0.708703	0.569356	0.66724	0.871578	0.711836	0.925725	0.711941	0.944723	0.731975	0.81615	0.855849	0.698808	0.999077	0.742798	0.617311	0.896839	0.738133	0.746053	0.710652	0.933633	0.692175	0.701275	0.647383	0.760528	0.813064	0.848818	0.746659
TCGA-CN-A63U-01A-11R-A30B-07	0.459159	0.720293	0.544625	0.508297	0.588755	0.522954	0.559011	0.617353	0.552781	0.796679	0.503381	0.673389	0.685322	0.601943	0.993443	0.645808	0.388903	0.838485	0.527582	0.540529	0.551915	0.676924	0.56468	0.46611	0.509922	0.595707	0.73923	0.8319	0.669409
TCGA-BA-7269-01A-11R-2016-07	0.703792	0.692042	0.632896	0.512418	0.622052	0.665285	0.604188	0.800309	0.697526	0.876927	0.571549	0.70332	0.795901	0.695992	0.963945	0.638809	0.511988	0.830156	0.616664	0.547888	0.625822	0.798011	0.664499	0.636695	0.618731	0.65341	0.76628	0.739085	0.638596
TCGA-CR-7369-01A-11R-2132-07	0.562706	0.743709	0.643903	0.657726	0.658598	0.758343	0.641577	0.783615	0.712214	0.85996	0.69174	0.726205	0.813015	0.752865	0.986558	0.711744	0.517047	0.858382	0.69739	0.645972	0.682797	0.859202	0.644871	0.641698	0.524212	0.726571	0.810679	0.7743	0.743614
TCGA-CQ-7065-01A-11R-2081-07	0.483225	0.697161	0.593147	0.493685	0.574639	0.433047	0.52187	0.564031	0.616124	0.829467	0.704516	0.546041	0.777078	0.638633	0.989641	0.656091	0.372042	0.827523	0.555144	0.487055	0.497177	0.705588	0.425427	0.495041	0.462484	0.551703	0.747215	0.842509	0.651647
TCGA-H7-A6C4-01A-11R-A30B-07	0.722963	0.84742	0.644922	0.601066	0.67615	0.759766	0.659706	0.772154	0.807537	0.88975	0.774972	0.770647	0.79445	0.741549	0.995526	0.716533	0.471048	0.887223	0.687721	0.685257	0.688836	0.822279	0.638791	0.703641	0.587241	0.723672	0.817299	0.847734	0.722267
TCGA-CV-6941-01A-11R-1915-07	0.715735	0.748531	0.651705	0.592323	0.654247	0.681549	0.646651	0.77413	0.768373	0.845219	0.628671	0.725702	0.800284	0.722365	0.992564	0.675291	0.499237	0.858951	0.657568	0.617596	0.66661	0.870942	0.614476	0.652012	0.48357	0.699317	0.806744	0.868541	0.677553
TCGA-MZ-A6I9-01A-11R-A31N-07	0.484566	0.695486	0.602192	0.668651	0.620482	0.696287	0.620676	0.760734	0.695753	0.868453	0.695792	0.726756	0.733562	0.645637	0.981772	0.70511	0.487063	0.817064	0.627394	0.576966	0.656294	0.76246	0.667719	0.593283	0.549844	0.697042	0.760425	0.780409	0.747455
TCGA-D6-8568-01A-11R-2403-07	0.754142	0.779118	0.668052	0.576833	0.689793	0.687114	0.658408	0.751427	0.767629	0.864328	0.557411	0.738717	0.784539	0.717332	0.996769	0.785012	0.528331	0.872612	0.651888	0.616715	0.672495	0.833689	0.564521	0.692344	0.49747	0.713421	0.813133	0.829616	0.812716
TCGA-CV-7421-01A-11R-2081-07	0.541741	0.753803	0.663272	0.503391	0.626516	0.637434	0.624656	0.7649	0.654183	0.847234	0.41332	0.690834	0.775469	0.650735	0.982135	0.663046	0.354759	0.875615	0.601479	0.590263	0.575287	0.78622	0.594624	0.603201	0.489585	0.654182	0.786522	0.842014	0.754751
TCGA-CQ-6228-01A-11R-1915-07	0.549336	0.690688	0.654013	0.640919	0.607424	0.588847	0.627979	0.662827	0.666033	0.832495	0.581792	0.657066	0.79898	0.563572	0.977945	0.667673	0.432948	0.856469	0.593042	0.563302	0.632388	0.820627	0.644016	0.520392	0.360506	0.658154	0.769169	0.805818	0.688344
TCGA-CN-4726-01A-01R-1436-07	0.502812	0.75722	0.686735	0.568697	0.670656	0.664929	0.639539	0.738756	0.814484	0.876911	0.738367	0.68092	0.851051	0.709049	0.991004	0.774567	0.53541	0.855373	0.632405	0.641103	0.628352	0.843421	0.629222	0.623097	0.497243	0.693928	0.801757	0.791021	0.672175
TCGA-UF-A71D-01A-12R-A34R-07	0.544229	0.670684	0.631365	0.62816	0.625549	0.709578	0.605916	0.774424	0.650164	0.853887	0.552211	0.699542	0.734978	0.553404	0.991851	0.602441	0.373003	0.846329	0.573704	0.583866	0.632504	0.744443	0.673126	0.571636	0.520899	0.681224	0.785096	0.817083	0.744757
TCGA-CQ-7069-01A-11R-2403-07	0.556798	0.783773	0.664924	0.493265	0.656419	0.669402	0.613539	0.698632	0.734344	0.869612	0.697339	0.665992	0.835435	0.597995	0.991327	0.696602	0.150929	0.83845	0.648573	0.596277	0.609658	0.778291	0.603128	0.591715	0.476264	0.65565	0.791765	0.828186	0.65699
TCGA-D6-A6ES-01A-12R-A31N-07	0.563943	0.616989	0.551603	0.531838	0.603329	0.655934	0.571131	0.681715	0.83927	0.899506	0.685875	0.576252	0.831507	0.64867	0.97378	0.692006	0.306488	0.781148	0.682553	0.557314	0.634634	0.77204	0.610144	0.401039	0.418833	0.640808	0.751797	0.778111	0.675363
TCGA-BA-A4IH-01A-11R-A266-07	0.738812	0.775233	0.692289	0.598255	0.652237	0.819687	0.656279	0.832535	0.603425	0.917147	0.65794	0.783861	0.682123	0.41768	0.995646	0.667413	0.486015	0.851092	0.593223	0.62294	0.653376	0.847233	0.659108	0.648696	0.609357	0.681606	0.800616	0.848596	0.69313
TCGA-CN-6019-01A-11R-1686-07	0.712112	0.820397	0.733869	0.614424	0.675029	0.815519	0.70574	0.811304	0.828548	0.923102	0.677948	0.760057	0.882545	0.735517	0.981713	0.751396	0.536669	0.859035	0.679171	0.691835	0.7138	0.972106	0.67269	0.620878	0.513383	0.764249	0.812357	0.724673	0.797101
TCGA-CV-A45P-01A-11R-A24H-07	0.530847	0.752449	0.664694	0.5123	0.653257	0.697533	0.632465	0.793237	0.696224	0.835674	0.64607	0.729521	0.740706	0.581599	0.994409	0.69774	0.293273	0.856594	0.581966	0.601597	0.646159	0.727061	0.566128	0.645203	0.588546	0.659648	0.803047	0.847501	0.665403
TCGA-CV-7238-01A-11R-2016-07	0.753599	0.777311	0.662917	0.652506	0.662873	0.832139	0.670732	0.870307	0.733256	0.904021	0.760784	0.791986	0.823919	0.643893	0.996894	0.729931	0.539331	0.897251	0.687024	0.672722	0.717704	0.886952	0.688345	0.678331	0.59811	0.758476	0.804561	0.902449	0.775119
TCGA-CX-A4AQ-01A-11R-A24Z-07	0.793885	0.7357	0.755992	0.756905	0.644849	0.783551	0.716302	0.852945	0.716849	0.960697	0.876162	0.808066	0.748156	0.314365	0.993562	0.703448	0.466197	0.860555	0.763146	0.669007	0.765312	0.939656	0.748326	0.650963	0.576244	0.803174	0.809938	0.801803	0.73653
TCGA-BB-4227-01A-01R-1873-07	0.649156	0.700619	0.629564	0.458328	0.611884	0.639975	0.60003	0.703066	0.799024	0.838472	0.36306	0.58235	0.804519	0.588264	0.974968	0.647156	0.618445	0.828217	0.52842	0.559265	0.612271	0.77331	0.486755	0.565211	0.490959	0.613502	0.761731	0.70042	0.649394
TCGA-MT-A67A-01A-11R-A30B-07	0.662719	0.739227	0.642549	0.487514	0.6201	0.814503	0.614677	0.92724	0.62688	0.846833	0.591235	0.789048	0.731571	0.755111	0.991725	0.677203	0.621625	0.85096	0.624273	0.63906	0.620516	0.758546	0.655798	0.626425	0.482102	0.682176	0.763353	0.773871	0.662473
TCGA-CV-7416-01A-11R-2081-07	0.707126	0.767007	0.669071	0.466366	0.634573	0.586356	0.620235	0.768532	0.784713	0.861448	0.685142	0.629199	0.862081	0.601948	0.989393	0.68359	0.418283	0.854866	0.62338	0.603148	0.598801	0.878337	0.608524	0.542409	0.501855	0.641883	0.791915	0.818938	0.676728
TCGA-UF-A71B-01A-12R-A34R-07	0.76255	0.728483	0.666794	0.595162	0.657046	0.698498	0.635718	0.777474	0.738437	0.85594	0.656392	0.718337	0.786764	0.628347	0.98535	0.726514	0.399598	0.856468	0.631211	0.628534	0.666648	0.865657	0.636127	0.653731	0.560551	0.707984	0.804237	0.852909	0.712944
TCGA-CV-6935-01A-11R-1915-07	0.492103	0.733621	0.665795	0.548315	0.620927	0.67024	0.626988	0.701894	0.71934	0.847901	0.577405	0.666636	0.805264	0.624493	0.977007	0.672188	0.117607	0.829051	0.599267	0.619837	0.613347	0.853408	0.623534	0.548726	0.569999	0.657795	0.784784	0.688917	0.75923
TCGA-CV-7437-01A-21R-2132-07	0.675886	0.742709	0.62306	0.537464	0.600081	0.573549	0.620485	0.731069	0.702528	0.880811	0.823083	0.658653	0.76918	0.521261	0.992286	0.624719	0.475099	0.852052	0.60132	0.590899	0.61197	0.844895	0.625432	0.58882	0.424521	0.634423	0.780039	0.751826	0.674287
TCGA-QK-A6II-01A-11R-A31N-07	0.453001	0.795202	0.634108	0.506774	0.637623	0.696237	0.621916	0.854397	0.697497	0.901768	0.637053	0.741258	0.755931	0.59626	0.991838	0.648073	0.312545	0.837532	0.657415	0.648531	0.646036	0.760274	0.633092	0.66738	0.592929	0.647883	0.782924	0.82486	0.64216
TCGA-CR-6480-01A-11R-1873-07	0.744448	0.801318	0.694045	0.641303	0.643629	0.770337	0.67777	0.820224	0.725411	0.91612	0.648813	0.766768	0.738197	0.543225	0.996072	0.700109	0.478841	0.845756	0.646863	0.655319	0.69706	0.857068	0.647167	0.629143	0.636366	0.717649	0.792622	0.779853	0.729641
TCGA-T2-A6WX-01A-12R-A34R-07	0.765357	0.902135	0.747281	0.623166	0.668809	0.957241	0.741856	0.969609	0.707341	0.943396	0.565037	0.871011	0.805237	0.416816	0.998976	0.738989	0.464532	0.884355	0.70637	0.772408	0.754696	0.916074	0.719523	0.775225	0.662922	0.795193	0.816388	0.915316	0.668304
TCGA-CN-6997-01A-11R-2016-07	0.678622	0.683478	0.623355	0.553303	0.591792	0.596902	0.609162	0.742596	0.643726	0.839522	0.564447	0.648089	0.813175	0.624743	0.983976	0.635726	0.397487	0.828238	0.591383	0.564656	0.592106	0.806015	0.497733	0.549407	0.426241	0.639404	0.785047	0.713114	0.778006
TCGA-D6-6823-01A-11R-1915-07	0.702024	0.699053	0.665751	0.553636	0.66145	0.623229	0.618576	0.704609	0.701927	0.837818	0.531854	0.707035	0.780015	0.618325	0.995643	0.717718	0.426115	0.852286	0.668343	0.58262	0.645511	0.767567	0.59537	0.672694	0.572837	0.672353	0.79743	0.819682	0.760559
TCGA-CV-7242-01A-11R-2016-07	0.720589	0.755682	0.661983	0.695261	0.655735	0.865275	0.685115	0.923135	0.712424	0.902812	0.718359	0.813447	0.782594	0.747661	0.994655	0.730608	0.575333	0.869413	0.698165	0.662046	0.717458	0.886088	0.703028	0.643898	0.59115	0.764796	0.814213	0.792916	0.714154
TCGA-T2-A6X0-01A-11R-A34R-07	0.704411	0.861112	0.630348	0.663261	0.59897	0.857855	0.681076	0.84746	0.618004	0.89391	0.486223	0.793839	0.770678	0.595883	0.994354	0.669591	0.557223	0.842699	0.632142	0.701627	0.671163	0.889671	0.704571	0.603894	0.597406	0.736147	0.789489	0.80596	0.688137
TCGA-CV-5442-01A-01R-1514-07	0.598922	0.665443	0.512541	0.481868	0.590303	0.643329	0.540513	0.710747	0.614681	0.795597	0.715111	0.615454	0.733526	0.460811	0.908809	0.650156	0.332639	0.748484	0.543142	0.579193	0.60355	0.748356	0.569358	0.572478	0.487271	0.590687	0.751407	0.607993	0.645846
TCGA-F7-A61S-01A-11R-A28V-07	0.76856	0.878853	0.712788	0.632876	0.679836	0.82637	0.699462	0.941273	0.788118	0.922819	0.612822	0.832801	0.794249	0.620122	0.998494	0.724108	0.632465	0.894555	0.707777	0.715181	0.725195	0.845251	0.682217	0.755467	0.544438	0.753167	0.822669	0.884913	0.68907
TCGA-CV-7090-01A-11R-2016-07	0.833896	0.837391	0.678333	0.580593	0.691284	0.77514	0.688209	0.876557	0.840051	0.907312	0.741159	0.792514	0.863722	0.732426	0.998443	0.744063	0.582797	0.877191	0.730237	0.716799	0.708738	0.955258	0.653381	0.709693	0.550866	0.752992	0.819433	0.862234	0.704274
TCGA-CV-7410-01A-21R-2081-07	0.789587	0.842996	0.723703	0.848096	0.682158	0.85783	0.746592	0.889089	0.756211	0.959327	0.79125	0.846779	0.823294	0.645304	0.998426	0.78104	0.628668	0.885833	0.790418	0.750452	0.809886	0.969667	0.836913	0.745701	0.62515	0.861552	0.831195	0.818019	0.800825
TCGA-CR-7391-01A-11R-2016-07	0.584339	0.796685	0.706299	0.69084	0.686833	0.894651	0.714735	0.897939	0.834218	0.922189	0.821032	0.812518	0.837029	0.801407	0.994089	0.780053	0.566057	0.885612	0.745282	0.709534	0.756239	0.947889	0.740022	0.71924	0.659841	0.798523	0.829241	0.84732	0.839031
TCGA-BA-A6DI-01A-11R-A30B-07	0.646253	0.794223	0.618265	0.550811	0.641819	0.687266	0.619915	0.730526	0.650495	0.898624	0.562497	0.708784	0.765619	0.496829	0.992844	0.650664	0.599182	0.866609	0.584549	0.566661	0.610166	0.694178	0.549196	0.646198	0.529679	0.640741	0.800267	0.790731	0.747024
TCGA-IQ-7630-01A-11R-2081-07	0.567523	0.773681	0.677929	0.515013	0.641212	0.730492	0.652248	0.886271	0.74661	0.891848	0.714246	0.747494	0.799635	0.476181	0.996997	0.677923	0.633514	0.875269	0.637128	0.649897	0.653902	0.847233	0.627712	0.658956	0.613794	0.682843	0.807478	0.882018	0.61812
TCGA-UF-A7JV-01A-11R-A34R-07	0.750479	0.936154	0.722634	0.545014	0.670017	0.769575	0.698302	0.843715	0.790053	0.906788	0.695902	0.755234	0.829085	0.394141	0.994885	0.697313	0.637637	0.877697	0.647258	0.705731	0.689335	0.927534	0.578828	0.706972	0.613669	0.722744	0.81821	0.856966	0.682798
TCGA-CN-4733-01A-02R-1873-07	0.786297	0.891339	0.755413	0.743023	0.712169	0.943722	0.765718	0.961233	0.902519	0.950352	0.775546	0.85929	0.817996	0.821785	0.998645	0.772904	0.654483	0.898172	0.799831	0.778591	0.804714	0.967685	0.819579	0.785138	0.679476	0.846823	0.852728	0.89379	0.83331
TCGA-CV-7180-01A-11R-2016-07	0.497231	0.683598	0.624769	0.548063	0.635132	0.752625	0.615391	0.780897	0.638442	0.846504	0.704819	0.752807	0.752641	0.62571	0.992247	0.587019	0.556712	0.840598	0.642732	0.589423	0.66847	0.80261	0.609586	0.640908	0.609652	0.674736	0.789618	0.7398	0.689074
TCGA-QK-A8ZA-01A-11R-A39I-07	0.721967	0.822796	0.615807	0.415296	0.608267	0.610472	0.598515	0.731937	0.661372	0.80071	0.437918	0.641934	0.768817	0.506353	0.991502	0.620306	0.31255	0.841668	0.554856	0.589409	0.556877	0.739513	0.498555	0.600935	0.493179	0.60567	0.792187	0.781425	0.684989
TCGA-CR-5250-01A-01R-1514-07	0.742759	0.76585	0.723972	0.689986	0.663794	0.729145	0.688113	0.815031	0.679543	0.875725	0.748843	0.751131	0.749725	0.654615	0.990962	0.675285	0.598571	0.831768	0.632145	0.641358	0.752037	0.894982	0.666253	0.619141	0.584676	0.758228	0.828624	0.745043	0.769484
TCGA-TN-A7HJ-01A-12R-A34R-07	0.529053	0.710677	0.606717	0.635074	0.629876	0.58783	0.605146	0.675339	0.67577	0.850823	0.656658	0.64786	0.75123	0.577026	0.987528	0.675254	0.494708	0.864575	0.589947	0.590515	0.61155	0.752142	0.632169	0.529946	0.470987	0.672165	0.787614	0.802775	0.773659
TCGA-CN-A6V6-01A-12R-A34R-07	0.712154	0.834906	0.662128	0.675791	0.662267	0.94024	0.716811	0.95506	0.684047	0.905694	0.591062	0.851553	0.757827	0.691596	0.998002	0.695824	0.680987	0.879719	0.655816	0.762076	0.735554	0.92108	0.736902	0.691644	0.647002	0.786696	0.81466	0.840344	0.698548
TCGA-CR-6492-01A-12R-2081-07	0.737699	0.825853	0.659798	0.624759	0.677705	0.735396	0.665901	0.83867	0.735509	0.878315	0.607443	0.782475	0.809871	0.730943	0.996692	0.739292	0.574653	0.896308	0.700387	0.659282	0.681181	0.85384	0.625924	0.673141	0.593333	0.725374	0.815278	0.858687	0.751116
TCGA-CQ-5334-01A-01R-1686-07	0.558469	0.874136	0.698207	0.608865	0.679535	0.912973	0.718467	0.974931	0.799841	0.919045	0.661768	0.845121	0.819273	0.701359	0.998773	0.768347	0.619902	0.898209	0.75176	0.763407	0.754782	0.944992	0.723377	0.718819	0.626931	0.776062	0.832198	0.854827	0.731025
TCGA-P3-A6T8-01A-11R-A34R-07	0.675766	0.714444	0.646831	0.461326	0.629854	0.360116	0.618045	0.743891	0.755313	0.810451	0.669525	0.645484	0.787435	0.54609	0.983032	0.687229	0.363635	0.834487	0.531505	0.556917	0.621396	0.79303	0.58382	0.619195	0.468029	0.622948	0.800284	0.763384	0.700106
TCGA-CV-A465-01A-11R-A266-07	0.506136	0.675718	0.601525	0.485324	0.611837	0.572507	0.568846	0.662924	0.625852	0.825935	0.654025	0.648984	0.77919	0.566134	0.990827	0.671187	0.375191	0.829803	0.566909	0.531486	0.577051	0.70879	0.524012	0.573807	0.554276	0.616477	0.769332	0.787432	0.67638
TCGA-P3-A6T3-01A-11R-A34R-07	0.502033	0.713846	0.559271	0.417102	0.604887	0.584781	0.54891	0.692321	0.668745	0.836331	0.584434	0.646134	0.748853	0.26231	0.990786	0.61103	0.33133	0.820635	0.534163	0.539566	0.526636	0.704648	0.55166	0.6291	0.559913	0.58751	0.767918	0.714934	0.604975
TCGA-HD-A4C1-01A-11R-A24H-07	0.514076	0.784335	0.642672	0.542266	0.637397	0.718574	0.623621	0.777943	0.638188	0.837888	0.541018	0.708598	0.754981	0.20642	0.995549	0.718642	0.449142	0.853273	0.575692	0.602461	0.610181	0.78101	0.551353	0.613722	0.560831	0.664976	0.791828	0.742989	0.709064
TCGA-CN-6992-01A-11R-1915-07	0.654677	0.766188	0.654257	0.576864	0.604743	0.651131	0.647962	0.731683	0.716631	0.857064	0.629741	0.645937	0.774735	0.51745	0.990228	0.665258	0.341574	0.824655	0.608497	0.622054	0.652857	0.868731	0.523491	0.578199	0.575446	0.684192	0.799411	0.730672	0.743437
TCGA-CN-5369-01A-01R-1436-07	0.727499	0.8754	0.69986	0.670295	0.694427	0.854704	0.71959	0.950086	0.777818	0.910769	0.659211	0.851061	0.816174	0.614227	0.998146	0.771804	0.569544	0.90694	0.729682	0.741314	0.740635	0.92695	0.723827	0.751457	0.650081	0.794855	0.831015	0.876316	0.7814
TCGA-CV-5977-01A-11R-1686-07	0.574676	0.81962	0.653832	0.50732	0.634536	0.617486	0.626688	0.79504	0.698159	0.862662	0.664094	0.749933	0.762737	0.576449	0.998451	0.670244	0.24672	0.869793	0.609621	0.630882	0.652834	0.775699	0.57294	0.687204	0.438049	0.641587	0.792275	0.873853	0.630039
TCGA-F7-A61W-01A-11R-A28V-07	0.550091	0.752067	0.619039	0.421811	0.598751	0.464888	0.555966	0.512482	0.662416	0.837468	0.694665	0.574599	0.787592	0.397506	0.992229	0.649511	0.373788	0.833411	0.565004	0.533733	0.52761	0.711535	0.468395	0.554253	0.516244	0.572974	0.763494	0.7864	0.670255
TCGA-CV-6951-01A-11R-1915-07	0.689668	0.706463	0.641871	0.479708	0.598855	0.647014	0.596568	0.689554	0.618224	0.835614	0.680195	0.651096	0.767376	0.666733	0.984255	0.676087	0.137863	0.839343	0.59157	0.563356	0.626221	0.761901	0.542525	0.558692	0.465718	0.625135	0.77741	0.795967	0.746472
TCGA-UF-A71E-01A-31R-A34R-07	0.686832	0.731392	0.616225	0.548313	0.604888	0.579063	0.570953	0.650852	0.627112	0.825339	0.658062	0.626162	0.767305	0.50324	0.981969	0.690111	0.352101	0.843137	0.549135	0.531712	0.539515	0.726807	0.550701	0.530506	0.379308	0.613625	0.765735	0.836351	0.664627
TCGA-CN-A497-01A-11R-A24H-07	0.527319	0.765581	0.64302	0.556921	0.648346	0.670495	0.664783	0.830729	0.754149	0.896877	0.634969	0.753384	0.768793	0.721513	0.991212	0.708071	0.455531	0.835742	0.622484	0.638318	0.700768	0.834476	0.644043	0.664015	0.504573	0.707934	0.801944	0.7814	0.77105
TCGA-BA-A6DJ-01A-11R-A30B-07	0.757819	0.862076	0.737681	0.570754	0.697666	0.831198	0.692796	0.944819	0.791594	0.940418	0.597305	0.830984	0.773983	0.652367	0.996784	0.720709	0.618138	0.876164	0.637601	0.724408	0.711828	0.847538	0.688631	0.750647	0.638861	0.727523	0.819764	0.890755	0.577527
TCGA-CR-6493-01A-11R-1873-07	0.533203	0.785139	0.665018	0.52222	0.645326	0.667674	0.615032	0.73228	0.69602	0.857745	0.448068	0.699219	0.717424	0.447318	0.996127	0.662434	0.401784	0.85481	0.650873	0.610422	0.58718	0.752549	0.564309	0.656264	0.587624	0.636127	0.796273	0.8752	0.69848
TCGA-CV-6937-01A-11R-2016-07	0.518257	0.631173	0.665622	0.483286	0.606465	0.609811	0.619538	0.680028	0.720118	0.9172	0.629768	0.621454	0.7975	0.357701	0.991812	0.676252	0.138251	0.842032	0.592309	0.558162	0.647891	0.835544	0.633734	0.499915	0.411562	0.642128	0.78215	0.740955	0.606615
TCGA-MT-A67D-01A-31R-A30B-07	0.764638	0.774388	0.681181	0.665971	0.694536	0.726858	0.668205	0.771756	0.740729	0.840704	0.6374	0.742429	0.80411	0.737168	0.990837	0.710926	0.555285	0.879945	0.725712	0.652865	0.700896	0.856204	0.678819	0.645868	0.610352	0.734503	0.806692	0.876454	0.760967
TCGA-CQ-7068-01A-11R-2081-07	0.774474	0.917215	0.774856	0.581721	0.679455	0.931422	0.756934	0.965291	0.722599	0.939715	0.610877	0.85237	0.78686	0.580753	0.999128	0.735057	0.633594	0.903808	0.740776	0.777523	0.759956	0.928678	0.712807	0.791067	0.67889	0.777942	0.824087	0.914461	0.741017
TCGA-CR-6472-01A-11R-1873-07	0.648766	0.743192	0.645552	0.671729	0.592319	0.713872	0.646815	0.782855	0.671111	0.805527	0.583576	0.740141	0.698931	0.661522	0.942104	0.659699	0.561461	0.819778	0.609042	0.612007	0.663278	0.779816	0.665628	0.573263	0.587639	0.696793	0.772165	0.780371	0.714988
TCGA-CQ-5329-01A-01R-1686-07	0.54534	0.794971	0.685507	0.595703	0.667092	0.804999	0.676496	0.877608	0.76914	0.935545	0.60276	0.798899	0.823743	0.672828	0.998604	0.711502	0.592178	0.864983	0.709676	0.688715	0.687859	0.918056	0.711664	0.6928	0.632106	0.730024	0.813937	0.819735	0.741137
TCGA-CQ-5325-01A-01R-1686-07	0.809597	0.943929	0.728773	0.730489	0.714055	0.927229	0.735648	0.959948	0.831975	0.933431	0.692909	0.857045	0.848238	0.7677	0.998383	0.762088	0.656029	0.904862	0.816593	0.798384	0.766844	0.957444	0.759359	0.730514	0.694856	0.818841	0.836011	0.876385	0.789966
TCGA-P3-A6T4-01A-11R-A34R-07	0.737305	0.708856	0.603453	0.512077	0.626182	0.711763	0.584827	0.661816	0.671656	0.853579	0.722762	0.688397	0.791373	0.567161	0.992495	0.715996	0.346088	0.857208	0.559553	0.55233	0.614727	0.795749	0.564698	0.598733	0.463483	0.643472	0.786929	0.808932	0.656251
TCGA-IQ-A61J-01A-11R-A30B-07	0.71176	0.77341	0.651236	0.551477	0.655332	0.731737	0.65792	0.820899	0.721411	0.921723	0.884116	0.749066	0.838906	0.7501	0.995669	0.714611	0.541121	0.86055	0.642621	0.656422	0.688199	0.888756	0.603198	0.6525	0.625046	0.710849	0.815599	0.844462	0.716961
TCGA-BA-A6DB-01A-11R-A30B-07	0.581241	0.791723	0.69169	0.693335	0.685451	0.899454	0.712536	0.914687	0.857181	0.91332	0.86103	0.839697	0.811688	0.811099	0.994631	0.746421	0.647356	0.879626	0.785543	0.727229	0.754884	0.930101	0.75744	0.697499	0.667658	0.798117	0.821131	0.880826	0.76223
TCGA-CQ-6221-01A-11R-2081-07	0.425615	0.736792	0.660672	0.523172	0.628422	0.621348	0.62881	0.779429	0.841715	0.897125	0.240626	0.690724	0.812389	0.319437	0.992449	0.726052	0.612229	0.82832	0.621516	0.565165	0.60648	0.923773	0.619474	0.554112	0.51843	0.677956	0.780376	0.71446	0.645592
TCGA-D6-6515-01A-21R-1873-07	0.867958	0.926438	0.712493	0.659082	0.694937	0.896634	0.750792	0.922446	0.727138	0.951846	0.933445	0.818067	0.832205	0.715098	0.999323	0.761549	0.65577	0.895647	0.753466	0.772033	0.758506	0.979679	0.706056	0.723194	0.709739	0.805876	0.85154	0.870788	0.746957
TCGA-CR-7365-01A-11R-2016-07	0.50493	0.718745	0.655181	0.548575	0.642036	0.679439	0.622454	0.737615	0.694735	0.858163	0.523441	0.724548	0.801938	0.647161	0.993415	0.713413	0.347681	0.855027	0.615483	0.58639	0.627442	0.818162	0.586138	0.62697	0.485038	0.668189	0.793423	0.777721	0.719828
TCGA-BA-5558-01A-01R-1514-07	0.74764	0.784133	0.671982	0.599205	0.693578	0.811301	0.691062	0.889656	0.783321	0.902929	0.550435	0.793155	0.834081	0.849975	0.997198	0.760564	0.578905	0.879843	0.714161	0.710917	0.715909	0.92883	0.666807	0.719962	0.627119	0.751129	0.828605	0.837352	0.758155
TCGA-F7-A50G-01A-11R-A266-07	0.767572	0.878356	0.694682	0.615264	0.669628	0.834807	0.684579	0.874314	0.781655	0.912021	0.837224	0.817445	0.811099	0.695632	0.997427	0.728202	0.58784	0.868572	0.705433	0.713594	0.721885	0.897142	0.706563	0.70457	0.581676	0.756094	0.816764	0.853776	0.753228
TCGA-CQ-6224-01A-11R-1915-07	0.728837	0.814924	0.680016	0.596156	0.649939	0.688257	0.676685	0.788431	0.791273	0.92113	0.841232	0.749235	0.814264	0.472858	0.995916	0.687406	0.453314	0.884578	0.698585	0.677136	0.692019	0.942832	0.592093	0.655471	0.612235	0.72766	0.816369	0.889883	0.754937
TCGA-UF-A719-01A-12R-A34R-07	0.733214	0.776473	0.688211	0.501235	0.627311	0.6554	0.638844	0.780463	0.642456	0.837292	0.609404	0.698611	0.759142	0.414923	0.996801	0.676262	0.479749	0.846197	0.530794	0.575241	0.641794	0.76002	0.554519	0.564987	0.542031	0.645423	0.780339	0.895832	0.686501
TCGA-CQ-A4CI-01A-11R-A266-07	0.73953	0.770521	0.592743	0.415751	0.585754	0.598452	0.572207	0.73963	0.669156	0.797878	0.494504	0.632075	0.765896	0.503592	0.97966	0.616378	0.329168	0.781136	0.546008	0.51389	0.557975	0.740707	0.565641	0.55746	0.481792	0.596556	0.777974	0.677406	0.662532
TCGA-CV-A6JN-01A-11R-A31N-07	0.747269	0.849488	0.661988	0.527486	0.673082	0.763425	0.66563	0.873439	0.746298	0.905991	0.717452	0.794692	0.7683	0.621545	0.99551	0.689016	0.519374	0.863377	0.745459	0.682496	0.672301	0.827869	0.654336	0.68738	0.587311	0.711328	0.788144	0.854886	0.660097
TCGA-T3-A92N-01A-11R-A39I-07	0.723132	0.814447	0.660261	0.53121	0.639645	0.747797	0.664673	0.865521	0.650522	0.88557	0.588016	0.779713	0.78707	0.516616	0.996691	0.661938	0.450657	0.892263	0.62304	0.671175	0.652343	0.850969	0.63197	0.699615	0.599738	0.690944	0.794123	0.824148	0.699884
TCGA-BA-A6DL-01A-21R-A30B-07	0.683634	0.705857	0.638999	0.546016	0.625621	0.689528	0.601876	0.799563	0.637445	0.813943	0.558421	0.723098	0.746042	0.596883	0.987787	0.656129	0.452379	0.830484	0.596262	0.560184	0.619206	0.688816	0.611462	0.636041	0.577169	0.665589	0.782213	0.861604	0.675328
TCGA-P3-A6T2-01A-11R-A34R-07	0.70055	0.811577	0.653879	0.506535	0.637267	0.665183	0.621004	0.742521	0.755493	0.833662	0.338195	0.715468	0.763788	0.486998	0.994249	0.65814	0.348805	0.839346	0.583696	0.609289	0.625674	0.783018	0.575984	0.61729	0.553019	0.635916	0.789552	0.841885	0.552182
TCGA-D6-A74Q-01A-11R-A34R-07	0.696905	0.754594	0.620406	0.614099	0.649972	0.737963	0.646104	0.884094	0.669442	0.852778	0.620396	0.740814	0.786749	0.719456	0.990207	0.666258	0.537793	0.852195	0.591789	0.613517	0.670567	0.769549	0.643364	0.679943	0.552635	0.70619	0.789464	0.826984	0.670489
TCGA-CQ-A4CA-01A-11R-A24Z-07	0.7437	0.796696	0.712982	0.595634	0.670935	0.861845	0.705939	0.945872	0.744147	0.932628	0.728539	0.830552	0.814332	0.684921	0.999475	0.714563	0.593068	0.884054	0.76284	0.713945	0.715581	0.909695	0.708629	0.723257	0.563948	0.758826	0.811599	0.884893	0.747019
TCGA-CN-4725-01A-01R-1436-07	0.505952	0.720672	0.613089	0.460701	0.633268	0.596978	0.588271	0.561517	0.713285	0.826051	0.616595	0.637401	0.790825	0.616256	0.982945	0.639515	0.295712	0.808834	0.589909	0.581456	0.605315	0.768838	0.486054	0.617351	0.543576	0.627208	0.788528	0.759924	0.75008
TCGA-QK-A8Z8-01A-11R-A39I-07	0.747836	0.727384	0.63251	0.535806	0.614565	0.644422	0.623806	0.769965	0.677013	0.930407	0.441692	0.70358	0.738296	0.566766	0.995796	0.661852	0.498861	0.845468	0.606731	0.549997	0.616428	0.727366	0.584348	0.564786	0.538843	0.655928	0.779656	0.869361	0.736359
TCGA-CV-7253-01A-11R-2016-07	0.447902	0.655402	0.604081	0.498427	0.574713	0.454088	0.564678	0.726509	0.629395	0.845504	0.654979	0.582497	0.773769	0.412873	0.986455	0.557937	0.449837	0.79119	0.526587	0.519094	0.556409	0.903978	0.468935	0.591233	0.462834	0.582992	0.762701	0.652245	0.691099
TCGA-CR-7367-01A-11R-2016-07	0.471559	0.76293	0.656136	0.665648	0.666666	0.796867	0.662623	0.801365	0.737072	0.885756	0.651184	0.739401	0.827171	0.702105	0.987032	0.730836	0.518729	0.857554	0.675432	0.673626	0.705666	0.906671	0.664756	0.611912	0.49951	0.742156	0.818251	0.77095	0.771115
TCGA-HD-8635-01A-11R-2403-07	0.685739	0.776603	0.64798	0.607159	0.656222	0.744595	0.636547	0.859206	0.814924	0.857863	0.641422	0.730115	0.810657	0.671786	0.994191	0.698703	0.454417	0.869214	0.612643	0.628249	0.656242	0.825023	0.585054	0.596708	0.538027	0.70985	0.785641	0.820314	0.742459
TCGA-CQ-6220-01A-11R-1915-07	0.73635	0.796171	0.691955	0.539575	0.661423	0.774606	0.657723	0.844079	0.782601	0.930524	0.629792	0.76842	0.8075	0.607796	0.997546	0.707633	0.485458	0.86041	0.684885	0.664483	0.66579	0.833358	0.641185	0.718883	0.545269	0.693322	0.804993	0.870097	0.706521
TCGA-IQ-A61O-01A-11R-A30B-07	0.658504	0.854545	0.72284	0.600244	0.623915	0.669529	0.654277	0.71093	0.684833	0.911653	0.552553	0.702038	0.849406	0.559757	0.976767	0.68084	0.351823	0.83514	0.613717	0.627493	0.667421	0.93836	0.651863	0.579509	0.563311	0.703443	0.792171	0.779408	0.686994
TCGA-BA-4076-01A-01R-1436-07	0.725805	0.694758	0.678099	0.48687	0.646193	0.507758	0.611902	0.690345	0.746034	0.84823	0.707001	0.598687	0.798466	0.615481	0.983752	0.67662	0.35032	0.802742	0.556895	0.575105	0.652056	0.759283	0.508119	0.534778	0.607441	0.638147	0.783256	0.702236	0.70055
TCGA-BA-6872-01A-11R-1873-07	0.749521	0.765447	0.621048	0.547212	0.669211	0.690087	0.644826	0.74114	0.757656	0.886107	0.64237	0.726023	0.809035	0.727451	0.993948	0.704807	0.433668	0.86824	0.62947	0.628599	0.663558	0.825303	0.633269	0.656882	0.541786	0.681136	0.78731	0.874795	0.707518
TCGA-CN-5366-01A-01R-1436-07	0.712368	0.827801	0.691328	0.495182	0.646955	0.810285	0.666683	0.893249	0.718736	0.859381	0.592528	0.783317	0.806673	0.598827	0.995974	0.675949	0.457283	0.862353	0.650598	0.668937	0.682929	0.866521	0.601569	0.65846	0.566306	0.707842	0.794056	0.808464	0.738219
TCGA-CV-5441-01A-01R-1514-07	0.486763	0.750539	0.621304	0.523233	0.613071	0.734913	0.613026	0.796774	0.674576	0.851362	0.664471	0.71511	0.791997	0.580804	0.991938	0.715782	0.46234	0.828929	0.640036	0.623472	0.6742	0.794631	0.581349	0.554106	0.523183	0.681393	0.778386	0.768834	0.722579
TCGA-P3-A6T5-01A-11R-A34R-07	0.767352	0.794203	0.627026	0.53058	0.663561	0.677152	0.649548	0.793448	0.732246	0.884768	0.842301	0.696648	0.829418	0.566439	0.990376	0.689228	0.525861	0.852243	0.624072	0.615503	0.670884	0.852646	0.655493	0.616625	0.552504	0.662353	0.784228	0.832713	0.684237
TCGA-CN-6020-01A-11R-1686-07	0.741346	0.769152	0.704696	0.574	0.682371	0.664802	0.681373	0.840076	0.690638	0.899621	0.642568	0.743565	0.815266	0.651384	0.995686	0.734377	0.529926	0.89209	0.636218	0.675872	0.692766	0.863471	0.667104	0.654483	0.616039	0.70883	0.815136	0.82446	0.751602
TCGA-CR-7364-01A-11R-2016-07	0.562535	0.731642	0.673308	0.609378	0.660068	0.645998	0.663934	0.717942	0.741591	0.853401	0.785061	0.668942	0.777517	0.749453	0.981951	0.728584	0.536869	0.849018	0.63024	0.626123	0.663812	0.853281	0.609827	0.600172	0.616383	0.703837	0.816239	0.794193	0.784627
TCGA-CV-6950-01A-11R-1915-07	0.729152	0.871196	0.673031	0.549764	0.642814	0.729882	0.647794	0.790998	0.708385	0.886303	0.610251	0.748691	0.81042	0.545714	0.994741	0.679938	0.518575	0.867904	0.622712	0.643147	0.654632	0.802991	0.590602	0.70617	0.504512	0.680055	0.802753	0.803334	0.734432
TCGA-CV-5435-01A-01R-1686-07	0.505987	0.761103	0.61665	0.511604	0.588695	0.5983	0.596094	0.743077	0.638581	0.84853	0.649763	0.614434	0.777391	0.597724	0.993304	0.587373	0.364222	0.819823	0.57396	0.566788	0.546918	0.775826	0.515723	0.449729	0.418723	0.60986	0.782844	0.72428	0.724215
TCGA-CV-6960-01A-41R-2016-07	0.591078	0.644764	0.663945	0.50785	0.612675	0.465269	0.601406	0.5215	0.676903	0.835495	0.747074	0.489185	0.776048	0.491202	0.975449	0.644437	0	0.826309	0.541141	0.529958	0.595309	0.745434	0.506107	0.587959	0.489383	0.600911	0.799667	0.718953	0.705781
TCGA-CR-7383-01A-11R-2132-07	0.748608	0.798854	0.686854	0.651179	0.681993	0.780781	0.692342	0.881328	0.781132	0.917881	0.799523	0.79287	0.826342	0.755545	0.994607	0.745376	0.596262	0.889485	0.729542	0.704088	0.750814	0.923799	0.697691	0.715035	0.644345	0.766124	0.817513	0.877703	0.788742
TCGA-H7-A76A-01A-51R-A34R-07	0.689283	0.823909	0.666504	0.75706	0.671471	0.857703	0.728737	0.93831	0.739697	0.940486	0.727782	0.86427	0.794847	0.589458	0.994799	0.748046	0.672231	0.877611	0.792734	0.766149	0.781007	0.971903	0.775549	0.699966	0.603182	0.834374	0.816066	0.800063	0.751169
TCGA-KU-A6H7-01A-11R-A31N-07	0.774748	0.870463	0.700771	0.625781	0.6653	0.932388	0.719958	0.953499	0.700849	0.916994	0.765296	0.865393	0.812281	0.413187	0.998603	0.701015	0.580104	0.873307	0.697311	0.767208	0.738879	0.91465	0.724611	0.75004	0.643277	0.77591	0.811264	0.890936	0.695723
TCGA-D6-8569-01A-11R-2403-07	0.771365	0.790858	0.699412	0.597021	0.672352	0.711738	0.679017	0.813521	0.77256	0.880082	0.70588	0.763914	0.76446	0.642538	0.998274	0.720917	0.479502	0.883265	0.704791	0.646019	0.683501	0.836128	0.653092	0.690335	0.608919	0.703447	0.809301	0.894119	0.749954
TCGA-QK-AA3K-01A-11R-A39I-07	0.480005	0.763657	0.669186	0.582017	0.640743	0.879786	0.665922	0.846737	0.792733	0.91672	0.612008	0.760311	0.787602	0.461845	0.990272	0.705069	0.443605	0.833208	0.697189	0.67046	0.689442	0.906951	0.682169	0.636968	0.52453	0.740987	0.794695	0.82394	0.70657
TCGA-D6-6517-01A-11R-1873-07	0.741703	0.776431	0.671924	0.647729	0.663189	0.661372	0.667345	0.715913	0.837666	0.906141	0.786218	0.685534	0.826344	0.632624	0.992055	0.714838	0.360043	0.856438	0.684442	0.66469	0.709287	0.892034	0.646994	0.674452	0.642351	0.728639	0.812552	0.795162	0.755479
TCGA-CN-5356-01A-01R-1436-07	0.765719	0.698939	0.682999	0.646043	0.640458	0.705817	0.639665	0.77664	0.697738	0.862817	0.562056	0.705058	0.793976	0.630589	0.986407	0.689251	0.541436	0.829479	0.603346	0.618065	0.67003	0.834349	0.675963	0.559968	0.580663	0.713183	0.790612	0.72115	0.801462
TCGA-CR-7382-01A-11R-2132-07	0.791161	0.93906	0.726404	0.66872	0.707913	0.816739	0.743148	0.887125	0.754562	0.90319	0.580206	0.831868	0.815173	0.729846	0.998976	0.805574	0.639799	0.903583	0.815451	0.756445	0.744649	0.969591	0.717549	0.732533	0.614068	0.805301	0.845868	0.906052	0.817299
TCGA-CV-7102-01A-11R-2016-07	0.727649	0.749197	0.648985	0.562675	0.645829	0.684852	0.636833	0.741553	0.803095	0.899972	0.655376	0.741808	0.832709	0.649348	0.993307	0.738205	0.421046	0.87	0.665912	0.661773	0.665991	0.913202	0.623818	0.631766	0.594538	0.720242	0.795698	0.7382	0.757779
TCGA-D6-A4ZB-01A-11R-A24Z-07	0.728061	0.701935	0.628527	0.579937	0.640621	0.695423	0.603182	0.783977	0.702627	0.837682	0.602525	0.699652	0.805403	0.537048	0.99215	0.716871	0.534445	0.831011	0.556075	0.581643	0.620718	0.745586	0.559963	0.625848	0.409424	0.677598	0.787829	0.750528	0.715337
TCGA-BB-A5HZ-01A-21R-A28V-07	0.495883	0.748023	0.621267	0.544235	0.630234	0.604526	0.586621	0.692515	0.70737	0.809444	0.614315	0.658504	0.73599	0.65706	0.986876	0.674889	0.391005	0.831659	0.580907	0.590363	0.635371	0.742562	0.607042	0.6142	0.456503	0.640012	0.780675	0.872457	0.698723
TCGA-CN-A63T-01A-11R-A28V-07	0.721447	0.770444	0.68614	0.597237	0.681738	0.774251	0.692794	0.880205	0.764177	0.890291	0.643142	0.819261	0.798359	0.6024	0.995299	0.71106	0.569254	0.869202	0.719554	0.685973	0.740699	0.883597	0.666152	0.713742	0.636525	0.748549	0.818021	0.826073	0.760953
TCGA-CV-7406-01A-11R-2081-07	0.679324	0.758236	0.631545	0.534517	0.629495	0.593853	0.624484	0.658379	0.716897	0.828746	0.758107	0.634045	0.748841	0.681482	0.961262	0.64798	0.474148	0.842002	0.590113	0.548596	0.588824	0.789498	0.53455	0.542237	0.585013	0.632308	0.782628	0.745891	0.765711
TCGA-CQ-A4CH-01A-11R-A266-07	0.730826	0.763562	0.583982	0.5663	0.646413	0.443263	0.587569	0.665913	0.674577	0.836897	0.640801	0.665304	0.831294	0.570957	0.986529	0.722911	0.271391	0.827652	0.609465	0.597584	0.596865	0.790362	0.614521	0.612776	0.534082	0.668374	0.780318	0.758236	0.70829
TCGA-D6-A6EO-01A-11R-A31N-07	0.74192	0.671217	0.609192	0.519397	0.641988	0.613598	0.590377	0.852202	0.693973	0.806867	0.449956	0.692541	0.719616	0.529365	0.996133	0.687825	0.360203	0.832134	0.62634	0.536497	0.646011	0.713567	0.55317	0.620642	0.560551	0.647864	0.782618	0.872101	0.773226
TCGA-D6-6827-01A-11R-1915-07	0.74199	0.684157	0.704009	0.54332	0.612157	0.654002	0.63707	0.674372	0.635428	0.867129	0.800716	0.657329	0.73603	0.625595	0.988202	0.664281	0.365525	0.821026	0.589045	0.600144	0.618434	0.828962	0.543134	0.55817	0.493223	0.656543	0.785856	0.691797	0.77195
TCGA-HL-7533-01A-11R-2232-07	0.583175	0.955956	0.674334	0.586235	0.627434	0.870815	0.690534	0.90795	0.601127	0.942797	0.663521	0.838053	0.779427	0.357887	0.998189	0.709338	0.580875	0.867453	0.641672	0.720276	0.690149	0.859278	0.693537	0.690016	0.586667	0.728162	0.788454	0.887555	0.656841
TCGA-CN-4729-01A-01R-1436-07	0.783252	0.736819	0.636805	0.575905	0.667572	0.667775	0.644972	0.751224	0.771028	0.87411	0.735228	0.687085	0.784501	0.781043	0.993324	0.710527	0.375432	0.849719	0.639682	0.625838	0.687266	0.864843	0.674989	0.606276	0.600645	0.705658	0.814564	0.699897	0.799312
TCGA-CN-6995-01A-31R-2016-07	0.753919	0.830755	0.727583	0.551792	0.654655	0.885732	0.718396	0.95299	0.747853	0.937637	0.707158	0.815887	0.80771	0.51608	0.998984	0.687905	0.566831	0.874273	0.679567	0.732959	0.723806	0.908603	0.690264	0.731141	0.651837	0.753154	0.817747	0.78829	0.738996
TCGA-CV-7425-01A-11R-2081-07	0.55644	0.873942	0.716485	0.615362	0.664066	0.838415	0.682451	0.897354	0.718473	0.916901	0.839105	0.801099	0.783453	0.686837	0.996793	0.710918	0.562304	0.885247	0.711574	0.707074	0.723509	0.882301	0.67633	0.721432	0.654971	0.736883	0.816953	0.843189	0.734017
TCGA-UF-A7JK-01A-11R-A34R-07	0.476597	0.676311	0.57313	0.386158	0.573873	0.527554	0.536662	0.576591	0.446516	0.829569	0.656096	0.523978	0.780796	0.352693	0.989665	0.59295	0.437161	0.825344	0.491213	0.455794	0.497859	0.710645	0.449911	0.41862	0.374223	0.55829	0.742871	0.695033	0.714441
TCGA-CV-7248-01A-11R-2016-07	0.719839	0.734605	0.68469	0.7106	0.652775	0.769372	0.662824	0.83961	0.716273	0.883447	0.65553	0.755876	0.806302	0.655632	0.986749	0.710229	0.428063	0.873282	0.697061	0.644667	0.705811	0.883801	0.711393	0.633947	0.419735	0.752114	0.802408	0.762394	0.79442
TCGA-CN-5370-01A-01R-2016-07	0.737796	0.920597	0.737492	0.608058	0.70227	0.7989	0.728015	0.895279	0.806337	0.924388	0.752165	0.802126	0.847339	0.703589	0.99736	0.765265	0.558129	0.91253	0.731875	0.754628	0.72709	0.962069	0.643687	0.730546	0.569526	0.773705	0.829554	0.872532	0.785094
TCGA-CV-7178-01A-21R-2016-07	0.700799	0.760304	0.674284	0.573592	0.641838	0.84487	0.674953	0.874978	0.633024	0.918581	0.741466	0.78316	0.816547	0.725358	0.997893	0.689046	0.48396	0.87673	0.692139	0.67525	0.697178	0.93963	0.609029	0.625115	0.59484	0.736415	0.803892	0.793424	0.740494
TCGA-CV-7429-01A-11R-2132-07	0.492946	0.799233	0.702142	0.55381	0.618622	0.790845	0.654652	0.833445	0.586548	0.86686	0.351781	0.734372	0.816853	0.542123	0.984146	0.703739	0.506535	0.850764	0.637802	0.659027	0.651844	0.879455	0.609474	0.616342	0.577953	0.713106	0.795562	0.823652	0.623458
TCGA-BA-A6DE-01A-22R-A31N-07	0.724045	0.732951	0.649243	0.528234	0.646955	0.68315	0.623706	0.822851	0.651065	0.854015	0.562185	0.738131	0.733555	0.542737	0.99747	0.665852	0.414298	0.84553	0.576312	0.581313	0.635369	0.722233	0.588238	0.665607	0.56291	0.64087	0.782939	0.822176	0.762653
TCGA-CV-6436-01A-11R-1686-07	0.741841	0.850996	0.709695	0.521357	0.663276	0.924205	0.702797	0.956832	0.7404	0.901759	0.491751	0.827169	0.781179	0.664702	0.994037	0.703377	0.571737	0.878596	0.704004	0.740105	0.734721	0.914422	0.74281	0.730459	0.648252	0.752135	0.794223	0.847708	0.660564
TCGA-UF-A7JJ-01A-11R-A34R-07	0.725117	0.800334	0.685509	0.67435	0.670331	0.881158	0.698138	0.894775	0.831912	0.937836	0.765281	0.803696	0.833785	0.590821	0.997453	0.762793	0.622119	0.89012	0.672819	0.709358	0.739007	0.943747	0.699586	0.684822	0.560701	0.790038	0.822457	0.86683	0.721945
TCGA-CQ-6225-01A-11R-1915-07	0.464656	0.548183	0.659239	0.487583	0.572873	0.535126	0.558556	0.521496	0.652779	0.796247	0.611925	0.578235	0.780927	0.293724	0.970091	0.605554	0.203303	0.793511	0.52624	0.481273	0.50842	0.743757	0.394095	0.42792	0.398096	0.562751	0.750275	0.683491	0.708791
TCGA-CV-A6K1-01A-11R-A31N-07	0.520229	0.755104	0.613046	0.472173	0.617978	0.732042	0.623397	0.906991	0.732455	0.877954	0.516187	0.741033	0.761429	0.520151	0.995266	0.656417	0.270167	0.832453	0.63171	0.618203	0.658068	0.798824	0.56607	0.633782	0.437872	0.667043	0.767728	0.871716	0.587416
TCGA-IQ-A61H-01A-11R-A30B-07	0.647555	0.842017	0.626816	0.544678	0.615384	0.684496	0.614628	0.753759	0.650206	0.828482	0.65501	0.734724	0.775409	0.585202	0.987822	0.656806	0.399804	0.857329	0.569911	0.622603	0.610206	0.766678	0.599782	0.596311	0.473108	0.65881	0.785633	0.696456	0.777098
TCGA-BB-A6UO-01A-12R-A34R-07	0.524872	0.8359	0.625392	0.44235	0.643072	0.68132	0.62954	0.872761	0.69577	0.888116	0.591483	0.729382	0.787969	0.391957	0.993771	0.683953	0.528236	0.855547	0.625512	0.622668	0.619939	0.821669	0.588505	0.62684	0.500752	0.648974	0.791359	0.882896	0.666235
TCGA-CV-6948-01A-11R-1915-07	0.689114	0.734827	0.626539	0.551797	0.597106	0.716896	0.631768	0.887403	0.724034	0.868571	0.667578	0.778989	0.803095	0.423841	0.989354	0.640831	0.544898	0.839536	0.623444	0.632526	0.635879	0.878032	0.606573	0.598689	0.449787	0.692	0.796572	0.755025	0.69726
TCGA-CQ-5327-01A-01R-1686-07	0.724204	0.857462	0.694687	0.635273	0.670533	0.884843	0.701167	0.930681	0.767071	0.941736	0.696643	0.836456	0.816194	0.633191	0.998265	0.752092	0.615276	0.880466	0.710978	0.721069	0.725418	0.930939	0.721335	0.715934	0.654113	0.75743	0.819643	0.861324	0.715472
TCGA-BA-A4II-01A-11R-A266-07	0.749317	0.709425	0.691895	0.590362	0.672501	0.711357	0.670543	0.811672	0.800809	0.858027	0.604053	0.760129	0.786094	0.42524	0.990944	0.738675	0.265551	0.844075	0.624661	0.639501	0.715807	0.831427	0.645231	0.696287	0.633637	0.712582	0.807019	0.788698	0.722558
TCGA-CN-A49C-01A-11R-A24H-07	0.737417	0.801271	0.710796	0.633593	0.642849	0.718599	0.661481	0.81874	0.688971	0.869173	0.750932	0.757351	0.749698	0.550778	0.986803	0.702991	0.45724	0.866211	0.642042	0.640246	0.671685	0.842862	0.64573	0.649808	0.614588	0.701027	0.781871	0.877066	0.704712
TCGA-IQ-7632-01A-11R-2081-07	0.720543	0.702713	0.657349	0.602271	0.634839	0.704699	0.612197	0.655671	0.624007	0.8236	0.669185	0.707529	0.766721	0.516493	0.991801	0.71079	0.435377	0.855756	0.579104	0.559302	0.610809	0.766881	0.585675	0.577815	0.494053	0.656938	0.792894	0.758297	0.708605
TCGA-BA-A6DD-01A-12R-A31N-07	0.732983	0.789548	0.696313	0.652787	0.679546	0.860752	0.698975	0.905135	0.795579	0.901842	0.693341	0.828413	0.784215	0.526444	0.99692	0.731115	0.649664	0.893068	0.703237	0.697206	0.728706	0.864157	0.696745	0.702292	0.604275	0.757236	0.812281	0.871369	0.710116
TCGA-QK-A6V9-01A-11R-A34R-07	0.806711	0.812117	0.698318	0.701847	0.63775	0.884436	0.700555	0.897024	0.66429	0.909904	0.696559	0.844953	0.75616	0.413616	0.997462	0.69035	0.648718	0.829731	0.687091	0.706174	0.719077	0.863166	0.700695	0.670114	0.619883	0.75395	0.796302	0.747578	0.685559
TCGA-BB-8596-01A-11R-2403-07	0.737454	0.792071	0.704073	0.613549	0.664511	0.676187	0.669096	0.725675	0.775924	0.881615	0.758736	0.709309	0.852155	0.735042	0.988156	0.711261	0.489893	0.857831	0.672394	0.660456	0.704956	0.927687	0.633237	0.614129	0.552991	0.737927	0.810141	0.71107	0.826373
TCGA-CR-6491-01A-11R-1873-07	0.753018	0.69657	0.639055	0.560101	0.640788	0.763984	0.63737	0.847858	0.690997	0.843303	0.659847	0.732416	0.732112	0.635999	0.994976	0.673022	0.364462	0.85462	0.589185	0.611635	0.659096	0.783729	0.579951	0.672029	0.472475	0.680863	0.795128	0.776756	0.698239
TCGA-D6-6826-01A-11R-1915-07	0.818758	0.783471	0.700689	0.620814	0.691074	0.741876	0.677966	0.813731	0.872015	0.900303	0.604149	0.734753	0.865595	0.709375	0.990628	0.805212	0.454019	0.887372	0.657921	0.673655	0.695523	0.952107	0.576004	0.663026	0.521336	0.759251	0.821396	0.834862	0.776938
TCGA-BA-5153-01A-01R-1436-07	0.596702	0.766517	0.693699	0.677928	0.663172	0.920775	0.699776	0.976241	0.714725	0.906698	0.739953	0.813941	0.759576	0.592626	0.994817	0.721576	0.632692	0.837077	0.675176	0.72888	0.752703	0.910991	0.605416	0.683115	0.646014	0.788259	0.819497	0.789652	0.762151
TCGA-CQ-5333-01A-01R-2403-07	0.741384	0.87918	0.712436	0.613388	0.665901	0.877956	0.740266	0.94486	0.729599	0.957534	0.773732	0.840183	0.827411	0.598916	0.998045	0.74192	0.58555	0.876134	0.728993	0.779227	0.773759	0.976249	0.736347	0.732427	0.609584	0.78736	0.819637	0.827412	0.674533
TCGA-WA-A7H4-01A-21R-A34R-07	0.518465	0.722267	0.619959	0.582643	0.625681	0.567221	0.628635	0.812178	0.75171	0.874929	0.762248	0.663438	0.796816	0.637207	0.990369	0.672398	0.517775	0.840236	0.610206	0.606519	0.632772	0.815519	0.568055	0.541022	0.510948	0.683637	0.803518	0.707653	0.721262
TCGA-CV-A468-01A-11R-A266-07	0.791517	0.829894	0.715959	0.677524	0.68591	0.920648	0.731125	0.943943	0.771958	0.915871	0.762506	0.845671	0.836095	0.715359	0.996353	0.697613	0.675601	0.8898	0.733414	0.738978	0.783372	0.914142	0.720219	0.698525	0.626288	0.800256	0.824308	0.907433	0.707482
TCGA-BA-4078-01A-01R-1436-07	0.717839	0.823437	0.681424	0.571161	0.607358	0.68625	0.654585	0.681883	0.733626	0.878935	0.763309	0.668427	0.767283	0.528946	0.990264	0.666489	0.313048	0.823076	0.584804	0.618174	0.647438	0.912465	0.534995	0.532575	0.525944	0.67895	0.79197	0.751442	0.728154
TCGA-CV-7430-01A-11R-2132-07	0.563145	0.64868	0.643425	0.492574	0.614111	0.651487	0.596604	0.705011	0.632825	0.798902	0.607215	0.63774	0.767333	0.54361	0.984642	0.676448	0.448946	0.837742	0.570361	0.566121	0.555591	0.743299	0.500225	0.555117	0.504844	0.61378	0.793731	0.758139	0.706675
TCGA-CN-A63V-01A-11R-A466-07	0.43481	0.728278	0.6599	0.51485	0.626642	0.682489	0.618214	0.771345	0.625815	0.850869	0.587477	0.640077	0.796003	0.575845	0.975313	0.70919	0.364773	0.807397	0.626637	0.600661	0.656382	0.847208	0.552587	0.600387	0.49581	0.684015	0.787377	0.67422	0.722381
TCGA-CN-6994-01A-11R-1915-07	0.540821	0.749141	0.662022	0.530169	0.627034	0.679948	0.638818	0.790224	0.736581	0.885882	0.705502	0.699762	0.816562	0.498838	0.985929	0.694187	0.57037	0.863134	0.636022	0.606993	0.644176	0.883343	0.602733	0.616057	0.511066	0.679918	0.804257	0.753671	0.680154
TCGA-CV-5432-01A-02R-1686-07	0.471712	0.664371	0.652144	0.578682	0.630806	0.725104	0.635249	0.759054	0.69088	0.864684	0.614649	0.723434	0.794294	0.612945	0.979785	0.676112	0.496692	0.830744	0.584907	0.594413	0.64524	0.796638	0.619328	0.642946	0.500492	0.676113	0.77991	0.756011	0.718562
TCGA-CR-7385-01A-11R-2016-07	0.754374	0.814743	0.724753	0.722675	0.668594	0.858414	0.718157	0.901864	0.783448	0.913029	0.799159	0.815084	0.802016	0.471449	0.99238	0.782755	0.63178	0.86228	0.711732	0.724579	0.755746	0.952031	0.740626	0.687898	0.679064	0.790685	0.809589	0.828555	0.743172
TCGA-CN-5374-01A-01R-1436-07	0.68293	0.749101	0.700655	0.747268	0.638359	0.858338	0.699399	0.918555	0.723836	0.91753	0.756383	0.831836	0.777018	0.637246	0.9961	0.737341	0.628065	0.852276	0.723321	0.686659	0.764137	0.918106	0.73746	0.692533	0.631705	0.792505	0.793837	0.779964	0.719001
TCGA-CR-7399-01A-11R-2016-07	0.587411	0.885268	0.724351	0.618665	0.661439	0.92883	0.726055	0.925661	0.728989	0.932899	0.70215	0.827703	0.80502	0.428015	0.996549	0.730565	0.479909	0.861398	0.712117	0.76885	0.739164	0.964127	0.746291	0.695323	0.669065	0.780095	0.828149	0.74951	0.711199
TCGA-MT-A51W-01A-21R-A266-07	0.779266	0.804662	0.639708	0.526875	0.671651	0.78411	0.652773	0.893889	0.725517	0.876149	0.654365	0.778911	0.798287	0.577045	0.997309	0.69037	0.58784	0.887023	0.704613	0.657499	0.645868	0.785483	0.622277	0.697412	0.573535	0.689372	0.796936	0.906614	0.674123
TCGA-BA-6873-01A-11R-1873-07	0.777168	0.807967	0.654011	0.566018	0.652066	0.776792	0.655536	0.886813	0.720747	0.882416	0.65864	0.799935	0.75317	0.532123	0.998968	0.705924	0.594631	0.866439	0.657744	0.654123	0.680585	0.817654	0.638353	0.695974	0.604795	0.706896	0.79938	0.879611	0.705688
TCGA-CQ-A4CB-01A-11R-A24Z-07	0.749182	0.802721	0.693691	0.627623	0.689959	0.675933	0.673936	0.738054	0.836289	0.84788	0.682148	0.748169	0.814146	0.657261	0.996152	0.741748	0.527136	0.892496	0.681912	0.671195	0.68537	0.888146	0.626611	0.691937	0.587042	0.72223	0.815251	0.887521	0.738788
TCGA-IQ-A61G-01A-11R-A30B-07	0.752172	0.692793	0.630623	0.467444	0.624196	0.594107	0.58575	0.728301	0.685721	0.85678	0.70802	0.688068	0.794093	0.250201	0.991641	0.666365	0.39432	0.829995	0.561819	0.559398	0.612912	0.75443	0.504439	0.632391	0.593161	0.609755	0.771579	0.821374	0.612471
TCGA-CN-6023-01A-11R-1686-07	0.758992	0.896136	0.688059	0.697739	0.636846	0.930253	0.729854	0.894669	0.720771	0.915984	0.598132	0.806999	0.784712	0.656311	0.997419	0.71686	0.604003	0.872657	0.716491	0.764784	0.727352	0.934954	0.750997	0.66227	0.597196	0.789406	0.80737	0.841386	0.746668
TCGA-DQ-7592-01A-11R-2081-07	0.765291	0.741667	0.649169	0.547065	0.644936	0.773742	0.63655	0.848663	0.667772	0.867487	0.586353	0.7824	0.796925	0.684225	0.998773	0.689488	0.448681	0.875035	0.642422	0.665766	0.676207	0.85689	0.633247	0.702441	0.585501	0.701577	0.808668	0.879625	0.748607
TCGA-CV-6954-01A-11R-1915-07	0.747817	0.761601	0.722169	0.563523	0.638393	0.721445	0.657008	0.746218	0.678007	0.936002	0.723277	0.746356	0.768995	0.498755	0.998899	0.685186	0.461552	0.866739	0.62676	0.638888	0.676553	0.883572	0.641409	0.681372	0.588865	0.681018	0.799428	0.864803	0.718695
TCGA-P3-A5Q6-01A-11R-A28V-07	0.532884	0.732322	0.629916	0.546819	0.622353	0.599265	0.618161	0.66401	0.790651	0.861593	0.682765	0.66954	0.802277	0.49772	0.989595	0.659136	0.442411	0.841796	0.62969	0.593196	0.629503	0.830411	0.612298	0.651377	0.502473	0.655315	0.783013	0.726187	0.681684
TCGA-CN-4730-01A-01R-1436-07	0.698847	0.674196	0.644569	0.508144	0.61816	0.564223	0.598836	0.750296	0.66297	0.81362	0.457558	0.650976	0.774071	0.548772	0.991926	0.649667	0.407808	0.79737	0.52695	0.544255	0.593427	0.756793	0.553161	0.589054	0.453687	0.628161	0.78037	0.653919	0.751689
TCGA-HD-7831-01A-11R-2132-07	0.493745	0.794789	0.650794	0.587029	0.641301	0.6091	0.623341	0.694531	0.801969	0.88083	0.773563	0.671157	0.819813	0.701374	0.989466	0.682414	0.16303	0.821226	0.583815	0.592748	0.660601	0.854984	0.644579	0.623025	0.433931	0.678527	0.804199	0.683652	0.655951
TCGA-F7-7848-01A-11R-2132-07	0.655725	0.712368	0.704755	0.674767	0.661137	0.7989	0.673623	0.855011	0.720826	0.864531	0.625395	0.730983	0.788819	0.629624	0.971357	0.731916	0.492325	0.845066	0.716626	0.650875	0.710078	0.89516	0.723868	0.572812	0.584108	0.763428	0.801634	0.753779	0.802847
TCGA-CV-A6K2-01A-11R-A31N-07	0.543748	0.807456	0.65233	0.549388	0.650724	0.72884	0.663157	0.889991	0.658428	0.827772	0.660283	0.769569	0.79603	0.543254	0.994547	0.754431	0.565498	0.884775	0.623168	0.683881	0.652224	0.863471	0.650764	0.639703	0.571436	0.691922	0.800896	0.823414	0.691766
TCGA-P3-A6T0-01A-12R-A34R-07	0.444845	0.718207	0.59624	0.424674	0.598251	0.599774	0.564856	0.787936	0.695574	0.811066	0.587253	0.642719	0.788708	0.3349	0.983253	0.609287	0.579912	0.797417	0.50761	0.565306	0.568686	0.72574	0.514955	0.641551	0.541125	0.598622	0.783288	0.605629	0.637179
TCGA-F7-A61V-01A-11R-A28V-07	0.724037	0.767583	0.656039	0.593454	0.631177	0.725943	0.62241	0.838268	0.680495	0.854423	0.750989	0.721834	0.788812	0.580527	0.990986	0.649401	0.53654	0.817277	0.604108	0.623463	0.638139	0.777554	0.652802	0.630913	0.621117	0.677308	0.784241	0.720178	0.685133
TCGA-BA-4077-01B-01R-1436-07	0.806472	0.859606	0.71995	0.605894	0.696121	0.830563	0.715702	0.917307	0.761675	0.936937	0.84566	0.811981	0.828103	0.652106	0.99901	0.7308	0.647376	0.902248	0.737066	0.695917	0.72236	0.948906	0.681994	0.717357	0.648246	0.746887	0.819175	0.834486	0.690099
TCGA-CN-4735-01A-01R-1436-07	0.598606	0.814893	0.711531	0.587867	0.637425	0.74739	0.701643	0.871234	0.738903	0.940381	0.853256	0.807023	0.786041	0.480006	0.994156	0.675263	0.368591	0.86595	0.627094	0.672185	0.695503	0.957215	0.64413	0.630446	0.533494	0.74422	0.83253	0.801241	0.714272
TCGA-CV-5443-01A-01R-1514-07	0.653066	0.884725	0.672668	0.650887	0.653185	0.878312	0.711329	0.931682	0.767635	0.920709	0.698397	0.833979	0.788842	0.599838	0.991099	0.695602	0.191581	0.856461	0.643553	0.750935	0.743683	0.946771	0.703544	0.701265	0.663539	0.782777	0.831543	0.774406	0.715035
TCGA-CR-7404-01A-11R-2132-07	0.689268	0.831024	0.678761	0.708619	0.665876	0.830792	0.701443	0.902883	0.801229	0.914858	0.616128	0.825226	0.820439	0.717196	0.996327	0.702228	0.600186	0.885609	0.716302	0.717014	0.745355	0.933684	0.743877	0.719815	0.59395	0.790594	0.819942	0.849151	0.75477
TCGA-CN-5355-01A-01R-1436-07	0.67721	0.747435	0.690715	0.627275	0.670807	0.595276	0.628093	0.7113	0.731038	0.858776	0.601965	0.671945	0.755383	0.696151	0.990186	0.718785	0.280017	0.82721	0.594904	0.612479	0.66602	0.811733	0.600961	0.618843	0.592112	0.704704	0.806587	0.700713	0.773552
TCGA-CN-6013-01A-11R-1686-07	0.799751	0.876479	0.683307	0.629703	0.674114	0.871832	0.746791	0.936301	0.869756	0.944776	0.673509	0.847439	0.838417	0.620209	0.999458	0.734747	0.600081	0.89527	0.727894	0.775506	0.770582	0.961561	0.730195	0.763716	0.6604	0.79732	0.832559	0.877738	0.760851
TCGA-HD-7832-01A-11R-2132-07	0.770579	0.857204	0.728297	0.474136	0.64133	0.75908	0.692101	0.820199	0.695791	0.887432	0.502218	0.784748	0.817756	0.501674	0.998849	0.711414	0.491259	0.879424	0.627772	0.675373	0.673145	0.858694	0.624741	0.720859	0.50747	0.689056	0.812472	0.924783	0.642005
TCGA-DQ-5630-01A-01R-1873-07	0.718891	0.838109	0.711646	0.612118	0.680571	0.798646	0.719008	0.971568	0.730626	0.946924	0.772899	0.833887	0.835992	0.644772	0.998993	0.745382	0.749837	0.893597	0.703394	0.752008	0.717221	0.91183	0.658446	0.741323	0.656368	0.765745	0.820833	0.887717	0.723517
TCGA-CV-7423-01A-11R-2081-07	0.514304	0.728836	0.636035	0.450194	0.629324	0.604068	0.588395	0.635389	0.712368	0.834521	0.667501	0.650701	0.791969	0.54812	0.991465	0.661248	0.449832	0.850553	0.564649	0.576236	0.584521	0.742435	0.517537	0.624829	0.463569	0.616022	0.780594	0.782109	0.658016
TCGA-CR-5249-01A-01R-1514-07	0.806868	0.835756	0.740213	0.791182	0.680775	0.863014	0.727269	0.861244	0.735807	0.910879	0.830757	0.815426	0.800254	0.70622	0.995349	0.77072	0.601178	0.868255	0.718579	0.716801	0.776659	0.95287	0.797167	0.684919	0.590778	0.821158	0.821265	0.790652	0.785592
TCGA-BA-A6DA-01A-31R-A31N-07	0.708929	0.767485	0.673737	0.555976	0.65378	0.73067	0.65446	0.785983	0.671028	0.877305	0.530802	0.774358	0.793397	0.68074	0.987911	0.688909	0.550348	0.836683	0.637018	0.640242	0.650732	0.774556	0.648548	0.63475	0.435004	0.680065	0.769851	0.816213	0.624416
TCGA-UF-A71A-01A-22R-A34R-07	0.492035	0.756279	0.639528	0.469881	0.592865	0.565214	0.597994	0.650154	0.73384	0.835263	0.66864	0.586517	0.789958	0.590625	0.96619	0.636956	0.360574	0.80736	0.558842	0.563692	0.572972	0.795571	0.492955	0.455027	0.422914	0.612501	0.767501	0.654914	0.728209
TCGA-QK-A6IH-01A-11R-A31N-07	0.669948	0.701109	0.596725	0.472727	0.624279	0.693213	0.599148	0.799283	0.756676	0.863794	0.616818	0.692337	0.808576	0.537968	0.988293	0.63236	0.471565	0.81623	0.604236	0.595399	0.598398	0.822101	0.613459	0.577088	0.519277	0.633069	0.760654	0.777568	0.624301
TCGA-BA-5557-01A-01R-1514-07	0.799143	0.862049	0.752273	0.630214	0.713659	0.800374	0.705407	0.830734	0.814838	0.903973	0.726869	0.780488	0.865653	0.643339	0.988234	0.830768	0.584943	0.873538	0.729252	0.722748	0.744462	0.957825	0.703769	0.717098	0.627846	0.765746	0.822299	0.806597	0.740681
TCGA-CN-A642-01A-12R-A30B-07	0.718714	0.799633	0.659508	0.567256	0.637241	0.859787	0.682468	0.914008	0.669106	0.921163	0.743877	0.80646	0.748649	0.661674	0.995413	0.684989	0.56305	0.865914	0.630204	0.704464	0.696029	0.871552	0.657905	0.681352	0.625357	0.722614	0.794511	0.849267	0.60071
TCGA-UF-A7JD-01A-11R-A34R-07	0.663005	0.725068	0.616356	0.525989	0.634423	0.592963	0.587689	0.648923	0.668684	0.848334	0.509246	0.69603	0.774335	0.609732	0.980282	0.676066	0.350318	0.827426	0.581509	0.537305	0.590865	0.813918	0.573691	0.581566	0.542203	0.655803	0.786313	0.768865	0.71071
TCGA-T2-A6X2-01A-12R-A34R-07	0.488029	0.782839	0.662644	0.524838	0.634152	0.830868	0.675039	0.926172	0.707184	0.913884	0.615332	0.787657	0.775311	0.465159	0.998087	0.654893	0.579398	0.857557	0.622559	0.684822	0.674974	0.867969	0.646383	0.720104	0.592367	0.711282	0.79344	0.836076	0.626878
TCGA-CN-6998-01A-23R-2016-07	0.740996	0.820228	0.644231	0.513137	0.645696	0.739182	0.64556	0.823864	0.71903	0.832738	0.619962	0.749118	0.812784	0.588946	0.997249	0.688306	0.284658	0.859525	0.630858	0.67852	0.6624	0.811606	0.608362	0.71064	0.612153	0.67663	0.80367	0.846339	0.733876
TCGA-CN-A641-01A-11R-A30B-07	0.567688	0.655171	0.609646	0.54342	0.620723	0.562317	0.574584	0.632465	0.661927	0.832559	0.659249	0.586695	0.756029	0.645565	0.985926	0.651331	0.406632	0.81885	0.549625	0.536201	0.589031	0.765306	0.508079	0.603478	0.550851	0.63485	0.773755	0.705709	0.718605
TCGA-MT-A7BN-01A-12R-A34R-07	0.662118	0.777374	0.620199	0.538503	0.624128	0.816104	0.663188	0.892317	0.830732	0.925797	0.558532	0.786027	0.81324	0.738456	0.978861	0.64511	0.358587	0.826353	0.714913	0.677112	0.69424	0.904028	0.643257	0.653259	0.651801	0.722874	0.758634	0.758974	0.576673
TCGA-CV-7089-01A-11R-2016-07	0.783731	0.876754	0.678815	0.599086	0.671192	0.751634	0.662568	0.825723	0.743169	0.899708	0.798623	0.775153	0.777182	0.69052	0.995963	0.687004	0.605985	0.88298	0.678643	0.663533	0.670488	0.838669	0.630685	0.673538	0.605388	0.710991	0.810457	0.849424	0.73967
TCGA-CX-7219-01A-11R-2016-07	0.738364	0.789055	0.694675	0.625842	0.676036	0.796461	0.680192	0.82548	0.747436	0.890763	0.605334	0.78171	0.814658	0.573265	0.996531	0.766137	0.516364	0.880913	0.682399	0.687455	0.691636	0.92601	0.654288	0.651175	0.593632	0.738776	0.819345	0.821077	0.729346
TCGA-D6-A6EP-01A-11R-A31N-07	0.660625	0.576393	0.531379	0.530081	0.566464	0.658297	0.55073	0.78692	0.725965	0.848897	0.30203	0.655252	0.682924	0.331788	0.963729	0.576335	0.0865156	0.762781	0.572796	0.529266	0.599075	0.75908	0.512043	0.523178	0.469823	0.633096	0.713639	0.786329	0.658343
TCGA-CV-7097-01A-11R-2016-07	0.562489	0.832227	0.690881	0.567844	0.675759	0.719006	0.692953	0.931012	0.823135	0.876294	0.441014	0.776747	0.829473	0.661145	0.993688	0.687794	0.600475	0.888411	0.701565	0.71591	0.693556	0.910508	0.634285	0.700188	0.593298	0.734497	0.819611	0.886659	0.700616
TCGA-CV-7433-01A-11R-2132-07	0.778283	0.852867	0.741736	0.608443	0.693203	0.909136	0.745956	0.948191	0.859575	0.938019	0.708259	0.835	0.853507	0.583898	0.998451	0.790646	0.51211	0.899946	0.750095	0.748958	0.765221	0.962602	0.717173	0.742747	0.635723	0.792012	0.842097	0.868616	0.725323
TCGA-QK-A6VC-01A-23R-A34R-07	0.790845	0.784908	0.731536	0.632641	0.675746	0.843421	0.706773	0.845672	0.767476	0.925912	0.792393	0.827216	0.774234	0.462968	0.996802	0.717365	0.560931	0.882491	0.678646	0.697653	0.743256	0.885656	0.664364	0.660952	0.582786	0.757871	0.807736	0.856016	0.738359
TCGA-CV-5444-01A-02R-1514-07	0.745656	0.813916	0.696046	0.61369	0.65325	0.734405	0.677936	0.921787	0.733504	0.930445	0.812727	0.804193	0.813918	0.649972	0.997766	0.747459	0.545247	0.896976	0.692565	0.704434	0.700514	0.955208	0.695197	0.666228	0.48918	0.75561	0.814367	0.896375	0.78675
TCGA-CV-A6JM-01A-11R-A31N-07	0.520582	0.713114	0.596942	0.494032	0.611324	0.635248	0.580139	0.761247	0.796972	0.831876	0.548018	0.710258	0.830472	0.479352	0.963874	0.59526	0.424899	0.788411	0.653348	0.596879	0.631431	0.784568	0.614527	0.677586	0.406463	0.652846	0.758327	0.807046	0.580686
TCGA-CQ-6223-01A-11R-1915-07	0.708984	0.7777	0.66202	0.592992	0.65744	0.731838	0.650592	0.837939	0.792983	0.890035	0.679024	0.775774	0.824761	0.717159	0.995846	0.732892	0.547189	0.882163	0.687133	0.65267	0.675438	0.862023	0.675513	0.672331	0.565896	0.709338	0.801566	0.829474	0.717569
TCGA-CX-7085-01A-21R-2016-07	0.740494	0.869946	0.713503	0.722935	0.725769	0.892161	0.728349	0.921862	0.812716	0.907911	0.688318	0.830038	0.827297	0.793553	0.995939	0.818204	0.55173	0.891805	0.804185	0.746948	0.767911	0.960519	0.753837	0.742514	0.593901	0.82366	0.845608	0.821701	0.807716
TCGA-CV-5430-01A-02R-1686-07	0.572993	0.763381	0.725278	0.662086	0.636128	0.788253	0.701981	0.798136	0.740469	0.902424	0.809008	0.783931	0.791143	0.558974	0.995787	0.726262	0.584284	0.875433	0.692069	0.670668	0.719409	0.928144	0.655559	0.616221	0.58411	0.751847	0.800557	0.835393	0.739228
TCGA-CR-6467-01A-11R-1873-07	0.685093	0.779034	0.702302	0.753878	0.647058	0.954293	0.713903	0.936366	0.691759	0.896107	0.730822	0.854977	0.757563	0.576007	0.993271	0.722249	0.570501	0.844636	0.731035	0.727784	0.773393	0.93747	0.78122	0.685091	0.647126	0.814858	0.814721	0.767225	0.742427
TCGA-CR-7392-01A-11R-2016-07	0.580776	0.844351	0.690953	0.731164	0.696532	0.874627	0.705225	0.902724	0.84619	0.922221	0.690224	0.813982	0.837359	0.779525	0.997943	0.778356	0.611064	0.888434	0.741408	0.726228	0.75701	0.934218	0.772881	0.732856	0.63946	0.803367	0.842339	0.862452	0.783609
TCGA-UF-A7JS-01A-11R-A34R-07	0.772961	0.767983	0.664288	0.516738	0.633402	0.670876	0.674402	0.928605	0.808183	0.905801	0.651555	0.743451	0.80755	0.647326	0.989966	0.671537	0.527715	0.851984	0.660531	0.682636	0.73722	0.88375	0.595224	0.639929	0.498143	0.684806	0.778576	0.913977	0.596364
TCGA-CV-7183-01A-11R-2016-07	0.450755	0.707176	0.632412	0.508381	0.617313	0.689757	0.572958	0.722426	0.689568	0.80867	0.636884	0.677542	0.768893	0.621403	0.985005	0.671441	0.377378	0.81435	0.605836	0.567556	0.574666	0.747238	0.576426	0.592719	0.509047	0.635894	0.784668	0.726395	0.709687
TCGA-UF-A7J9-01A-12R-A34R-07	0.534145	0.797005	0.663207	0.49315	0.622334	0.605949	0.653738	0.767838	0.743093	0.877646	0.480621	0.697762	0.816069	0.447698	0.98402	0.68961	0.324002	0.831125	0.575611	0.61553	0.639478	0.86492	0.543845	0.624839	0.50517	0.672055	0.796572	0.741884	0.702366
TCGA-F7-A624-01A-22R-A30B-07	0.694844	0.92906	0.661071	0.64904	0.630327	0.952234	0.721379	0.972671	0.720689	0.888967	0.539663	0.887783	0.799397	0.345749	0.997124	0.691846	0.632595	0.839431	0.746712	0.81879	0.766283	0.937013	0.739775	0.757777	0.692627	0.812448	0.791204	0.828282	0.59078
TCGA-DQ-5631-01A-01R-1873-07	0.490536	0.719676	0.644045	0.566774	0.613996	0.546079	0.604103	0.648075	0.704445	0.87558	0.815557	0.580136	0.810101	0.477748	0.985667	0.604906	0.347301	0.81491	0.555404	0.573998	0.599535	0.799485	0.545825	0.554952	0.49443	0.630725	0.80053	0.717515	0.664001
TCGA-CV-7414-01A-11R-2081-07	0.566554	0.798394	0.650799	0.531602	0.588833	0.665971	0.649375	0.885115	0.415659	0.853745	0.6977	0.719063	0.748629	0.670994	0.992919	0.652203	0.639969	0.853169	0.592937	0.620581	0.622821	0.789523	0.596721	0.533266	0.518465	0.667821	0.783342	0.797127	0.692704
TCGA-UF-A7JT-01A-11R-A34R-07	0.750592	0.913574	0.722015	0.595049	0.678479	0.923418	0.735409	0.965504	0.749628	0.941094	0.410335	0.857185	0.828225	0.48251	0.998578	0.757467	0.584319	0.886314	0.741048	0.763705	0.739256	0.926264	0.703702	0.794722	0.638038	0.790719	0.816803	0.878961	0.677937
TCGA-CR-6471-01A-11R-1873-07	0.556179	0.801424	0.667062	0.67538	0.678793	0.903622	0.682066	0.886969	0.794221	0.904882	0.821656	0.810341	0.816423	0.684667	0.995702	0.750353	0.514402	0.877238	0.732759	0.716356	0.747541	0.928906	0.73575	0.699142	0.662275	0.782963	0.819608	0.839255	0.75195
TCGA-HD-A6I0-01A-11R-A31N-07	0.524804	0.854662	0.635481	0.551098	0.650422	0.806193	0.654629	0.906827	0.774903	0.91832	0.286189	0.790483	0.792137	0.649353	0.995332	0.680428	0.215243	0.834701	0.69958	0.685442	0.685659	0.842989	0.659204	0.687467	0.569928	0.706227	0.788573	0.864984	0.633626
TCGA-CV-6942-01A-21R-2016-07	0.821263	0.924543	0.688607	0.703685	0.684723	0.893406	0.727568	0.965703	0.835086	0.922821	0.511786	0.843341	0.803867	0.799464	0.997098	0.7466	0.42726	0.897213	0.703841	0.768901	0.74497	0.929491	0.679265	0.724465	0.618148	0.802302	0.825672	0.89878	0.770102
TCGA-CR-6487-01A-11R-1873-07	0.799739	0.923308	0.748163	0.756299	0.665009	0.974368	0.780027	0.968993	0.822216	0.922378	0.716596	0.888342	0.795963	0.7374	0.998671	0.745314	0.599554	0.868974	0.775536	0.816895	0.810958	0.972589	0.81613	0.782478	0.664828	0.852261	0.83076	0.831592	0.743208
TCGA-CV-7245-01A-11R-2016-07	0.585366	0.685971	0.625639	0.513006	0.636738	0.700328	0.608537	0.795201	0.753538	0.852061	0.66391	0.6611	0.795648	0.603998	0.992851	0.674301	0.427089	0.822545	0.59814	0.567762	0.61556	0.775267	0.562017	0.633694	0.495542	0.639912	0.800038	0.761998	0.728089
TCGA-MT-A51X-01A-11R-A266-07	0.487646	0.706042	0.611866	0.572881	0.636121	0.703631	0.590059	0.780714	0.686628	0.846317	0.698775	0.717018	0.784364	0.6776	0.994066	0.695954	0.530474	0.846193	0.662477	0.605138	0.638587	0.77697	0.603764	0.59516	0.601493	0.674657	0.790284	0.775988	0.697828
TCGA-CR-5247-01A-01R-2016-07	0.527661	0.684286	0.618495	0.512503	0.61299	0.500312	0.570948	0.687646	0.63438	0.831336	0.576515	0.568263	0.798719	0.697558	0.988068	0.643417	0.457563	0.816674	0.552594	0.48117	0.554845	0.715092	0.518459	0.514687	0.463079	0.617366	0.763004	0.745667	0.626204
TCGA-DQ-5625-01A-01R-1873-07	0.765376	0.892617	0.705733	0.577774	0.679232	0.938233	0.711253	0.971668	0.725764	0.921721	0.802251	0.842923	0.791309	0.593509	0.99917	0.712716	0.648473	0.88337	0.727017	0.783248	0.739932	0.938461	0.671671	0.748471	0.675412	0.7735	0.825654	0.895496	0.732193
TCGA-CR-5248-01A-01R-2016-07	0.739928	0.81293	0.72041	0.741996	0.662792	0.922147	0.740328	0.986618	0.804931	0.935516	0.628613	0.873342	0.817839	0.450717	0.992268	0.725955	0.723732	0.846867	0.737862	0.814568	0.808215	0.961993	0.801637	0.790584	0.66332	0.851083	0.823864	0.786153	0.740131
TCGA-CV-A460-01A-21R-A24Z-07	0.607337	0.812031	0.752486	0.662709	0.677458	0.799383	0.724399	0.87964	0.739537	0.906544	0.784284	0.821352	0.782897	0.673786	0.993726	0.694666	0.573727	0.882177	0.676509	0.731438	0.760934	0.929262	0.718874	0.69642	0.639705	0.781963	0.834944	0.804734	0.741707
TCGA-CR-7393-01A-11R-2016-07	0.810533	0.797885	0.708951	0.729781	0.7025	0.869748	0.719409	0.915189	0.843863	0.922065	0.847929	0.800946	0.817386	0.798468	0.991096	0.810441	0.634227	0.874976	0.862559	0.712367	0.754222	0.972818	0.729868	0.664867	0.650875	0.822625	0.832983	0.800587	0.844553
TCGA-BB-A6UM-01A-12R-A34R-07	0.581374	0.848089	0.695237	0.536623	0.642258	0.872645	0.692644	0.928974	0.708151	0.927014	0.599436	0.831344	0.721073	0.465157	0.998942	0.706056	0.652897	0.869225	0.662907	0.720153	0.713615	0.842989	0.683014	0.70195	0.613823	0.724603	0.791377	0.894822	0.685278
TCGA-QK-A64Z-01A-11R-A30B-07	0.558018	0.763119	0.653511	0.489356	0.623709	0.720378	0.622887	0.838436	0.626594	0.874229	0.630891	0.737132	0.765977	0.6267	0.997757	0.660402	0.548767	0.875401	0.607182	0.642728	0.595882	0.799205	0.623825	0.644036	0.515822	0.652796	0.787213	0.886153	0.709331
TCGA-DQ-7588-01A-11R-2081-07	0.466322	0.66537	0.666836	0.435363	0.593204	0.625363	0.533046	0.601451	0.517377	0.750016	0.489456	0.593377	0.712941	0.496399	0.985359	0.618358	0.0458055	0.773803	0.468324	0.4487	0.508395	0.595225	0.57334	0.617269	0.531091	0.555534	0.750747	0.658331	0.651375
TCGA-CR-7371-01A-11R-2016-07	0.717238	0.778987	0.694542	0.64636	0.675975	0.803169	0.694297	0.841217	0.821983	0.876733	0.676686	0.771498	0.80284	0.69082	0.991627	0.77276	0.559916	0.874866	0.709671	0.667436	0.718305	0.907154	0.691317	0.654601	0.620586	0.76352	0.828361	0.800828	0.803534
TCGA-F7-A620-01A-11R-A28V-07	0.572302	0.884236	0.696038	0.65593	0.686502	0.850842	0.71765	0.964958	0.728939	0.908486	0.58162	0.860057	0.793103	0.696826	0.99901	0.707257	0.67066	0.878831	0.754381	0.745065	0.730532	0.857982	0.713049	0.764968	0.594678	0.771905	0.819332	0.887726	0.702025
TCGA-CN-4738-01A-02R-1514-07	0.679816	0.786724	0.654657	0.618151	0.668951	0.839356	0.678021	0.857078	0.73591	0.90952	0.711289	0.788196	0.827997	0.726451	0.995636	0.769228	0.483743	0.892315	0.697213	0.693001	0.70622	0.912008	0.692793	0.690401	0.644432	0.75847	0.821711	0.824373	0.772688
TCGA-HD-7754-01A-11R-2081-07	0.464966	0.69827	0.681302	0.593415	0.615513	0.665412	0.627572	0.693776	0.736041	0.856883	0.637056	0.622131	0.80733	0.583805	0.953576	0.7352	0.51396	0.817969	0.565921	0.580354	0.649882	0.867817	0.48728	0.557106	0.469027	0.686411	0.785948	0.721013	0.66988
TCGA-CV-6962-01A-11R-1915-07	0.540545	0.687796	0.563003	0.477878	0.576172	0.603026	0.556754	0.694554	0.701583	0.768148	0.417887	0.594631	0.759893	0.565953	0.963923	0.623028	0.377995	0.799844	0.546687	0.514342	0.529194	0.71987	0.452364	0.508803	0.467448	0.584176	0.759122	0.717013	0.742131
TCGA-CQ-5323-01A-01R-1686-07	0.735506	0.757192	0.687851	0.638995	0.664329	0.793996	0.678904	0.831995	0.744286	0.912649	0.659667	0.790345	0.766496	0.637842	0.996809	0.70942	0.49103	0.87407	0.636259	0.636197	0.716102	0.851452	0.667155	0.693553	0.559018	0.722877	0.813843	0.869972	0.749422
TCGA-CV-6938-01A-11R-1915-07	0.868763	0.91334	0.776036	0.549777	0.677724	0.9038	0.743507	0.939469	0.906887	0.929837	0.752767	0.839634	0.853102	0.44658	0.999043	0.76433	0.556635	0.914632	0.735468	0.759315	0.729464	0.945221	0.703002	0.732718	0.68292	0.764064	0.820618	0.879074	0.690051
TCGA-CV-5440-01A-01R-1514-07	0.471567	0.703901	0.598599	0.473464	0.600601	0.599875	0.585808	0.706678	0.633628	0.841406	0.638505	0.667521	0.7793	0.54953	0.995548	0.603495	0.53492	0.848869	0.555044	0.549446	0.553188	0.752676	0.507191	0.56594	0.459304	0.602189	0.762558	0.746363	0.806158
TCGA-UF-A718-01A-22R-A34R-07	0.735701	0.741175	0.692931	0.640664	0.657575	0.766525	0.675066	0.826091	0.759838	0.906424	0.692364	0.755939	0.7903	0.584836	0.994412	0.695691	0.538064	0.867214	0.644666	0.643189	0.713748	0.851477	0.656492	0.664351	0.597466	0.722143	0.811819	0.757889	0.72457
TCGA-KU-A66T-01A-11R-A30B-07	0.535652	0.659749	0.620587	0.424622	0.597136	0.418664	0.560507	0.710684	0.648936	0.774543	0.610909	0.558271	0.734929	0.329331	0.972605	0.648906	0.624591	0.83814	0.464049	0.489138	0.536477	0.675602	0.400362	0.547687	0.427257	0.555872	0.758498	0.748692	0.635926
TCGA-BB-A5HU-01A-11R-A28V-07	0.72086	0.712806	0.672909	0.551647	0.647976	0.644549	0.637885	0.652721	0.791868	0.869134	0.786969	0.687707	0.78573	0.576374	0.98343	0.697916	0.308841	0.827812	0.598635	0.578123	0.68413	0.863344	0.621109	0.621051	0.539436	0.674284	0.800625	0.688764	0.639764
TCGA-HD-7753-01A-11R-2081-07	0.828193	0.776816	0.66799	0.590329	0.679119	0.729399	0.654894	0.83952	0.798993	0.862003	0.656314	0.749117	0.791718	0.6248	0.994793	0.720433	0.577471	0.882823	0.637024	0.654172	0.691499	0.823524	0.644365	0.706946	0.631525	0.709643	0.816162	0.807551	0.724923
TCGA-UF-A71A-06A-11R-A39I-07	0.545027	0.723251	0.577032	0.39368	0.559304	0.568136	0.553995	0.50565	0.674347	0.806733	0.657309	0.521823	0.764782	0.500481	0.954686	0.640163	0.305027	0.766431	0.518024	0.49584	0.490253	0.71001	0.486994	0.445624	0.38081	0.541917	0.74551	0.631801	0.60507
TCGA-CV-7177-01A-11R-2016-07	0.50312	0.712968	0.691557	0.551108	0.628218	0.627269	0.618085	0.688219	0.73356	0.861344	0.763196	0.622216	0.799013	0.726746	0.975769	0.691863	0.547739	0.833811	0.617785	0.575342	0.624287	0.879862	0.557726	0.546962	0.508944	0.662114	0.782363	0.687206	0.738923
TCGA-CV-7263-01A-11R-2016-07	0.728208	0.742482	0.694714	0.661824	0.651374	0.722589	0.665947	0.792835	0.750318	0.90313	0.791196	0.763667	0.858316	0.712945	0.993231	0.703729	0.507445	0.846412	0.68062	0.655497	0.708029	0.923468	0.668194	0.641513	0.582142	0.735771	0.802745	0.776964	0.760186
TCGA-CV-6955-01A-11R-2016-07	0.79338	0.808876	0.713048	0.595982	0.669705	0.826802	0.703563	0.89785	0.750322	0.926935	0.862383	0.791603	0.802334	0.682846	0.996826	0.742667	0.660006	0.876653	0.698665	0.719227	0.713784	0.911194	0.614788	0.677199	0.599696	0.739819	0.811249	0.83063	0.737699
TCGA-MT-A67F-01A-11R-A30B-07	0.813238	0.942239	0.736453	0.630054	0.716858	0.954293	0.750197	0.970744	0.835488	0.943389	0.676562	0.884092	0.826286	0.816375	0.996921	0.79473	0.713924	0.900145	0.772614	0.813955	0.8007	0.941434	0.745696	0.809059	0.692525	0.824849	0.847542	0.906955	0.692655
TCGA-D6-A4Z9-01A-11R-A24Z-07	0.70226	0.777453	0.67196	0.579442	0.654853	0.67517	0.653524	0.850508	0.699833	0.864945	0.603843	0.768128	0.777344	0.675017	0.9984	0.720036	0.568081	0.86042	0.671357	0.650452	0.66411	0.831427	0.609991	0.646771	0.572689	0.696707	0.80092	0.817422	0.716717
TCGA-CV-A45X-01A-21R-A24Z-07	0.511207	0.652685	0.606633	0.534537	0.626207	0.609913	0.595818	0.659735	0.620116	0.842699	0.750764	0.644974	0.776452	0.343128	0.985461	0.690671	0.369087	0.844237	0.581507	0.60266	0.608497	0.776563	0.526401	0.593773	0.393695	0.649529	0.785388	0.771457	0.699313
TCGA-CR-6481-01A-11R-1873-07	0.825379	0.871226	0.782981	0.784935	0.704768	0.945246	0.776141	0.963467	0.805119	0.940785	0.75118	0.867448	0.834815	0.723099	0.996091	0.780178	0.706385	0.882666	0.806464	0.800331	0.809161	0.980823	0.838963	0.781552	0.705515	0.86634	0.838013	0.830698	0.823206
TCGA-CR-7386-01A-11R-2016-07	0.598539	0.844455	0.726254	0.594808	0.673363	0.828352	0.728789	0.862769	0.7721	0.937337	0.824702	0.803782	0.860128	0.778653	0.996938	0.793486	0.636685	0.905043	0.746376	0.7365	0.742785	0.965194	0.72519	0.700738	0.638809	0.778836	0.830554	0.865175	0.771746
TCGA-4P-AA8J-01A-11R-A39I-07	0.697179	0.799747	0.64814	0.634994	0.660354	0.720251	0.668546	0.846629	0.735776	0.913147	0.793056	0.776211	0.799202	0.692455	0.992345	0.715682	0.454605	0.869583	0.67887	0.662298	0.700253	0.881437	0.678901	0.658972	0.619565	0.731703	0.796645	0.815187	0.694816
TCGA-CN-5364-01A-01R-1436-07	0.733551	0.779071	0.744746	0.548994	0.659743	0.652884	0.668213	0.86279	0.703003	0.884786	0.817327	0.74311	0.848837	0.60263	0.987641	0.668988	0.564467	0.889081	0.649822	0.661031	0.6677	0.897193	0.609474	0.603321	0.569373	0.699085	0.797765	0.818475	0.745718
TCGA-H7-7774-01A-21R-2081-07	0.726763	0.780736	0.70559	0.625921	0.643604	0.845683	0.664125	0.835019	0.793482	0.914326	0.860106	0.776549	0.788903	0.705641	0.996167	0.651775	0.48654	0.873417	0.693846	0.694277	0.689331	0.884639	0.693058	0.655119	0.606539	0.734513	0.810938	0.845055	0.731752
TCGA-QK-A8Z9-01B-11R-A39I-07	0.789916	0.794426	0.652985	0.590703	0.63615	0.769194	0.664413	0.792494	0.687193	0.92798	0.761441	0.750443	0.823312	0.592897	0.996811	0.708431	0.458837	0.887329	0.658812	0.665498	0.701476	0.92385	0.639001	0.659355	0.611292	0.724957	0.803704	0.828546	0.673353
TCGA-BB-8601-01A-11R-2403-07	0.724172	0.706798	0.598909	0.538032	0.577535	0.545062	0.557021	0.623856	0.528954	0.727629	0.537039	0.498577	0.706809	0.635039	0.961533	0.624888	0.385723	0.735807	0.444426	0.502773	0.54849	0.63751	0.453741	0.4128	0.525164	0.56154	0.755802	0.592995	0.670091
TCGA-CV-6433-01A-11R-1686-07	0.776787	0.77111	0.71797	0.639048	0.659771	0.976249	0.725894	0.960402	0.711654	0.93006	0.735946	0.850253	0.789193	0.426296	0.998621	0.694617	0.581807	0.85573	0.693659	0.753382	0.754606	0.942985	0.752858	0.720792	0.677435	0.788557	0.821821	0.841854	0.683465
TCGA-CN-A6V3-01A-12R-A34R-07	0.710926	0.771892	0.671046	0.609072	0.66648	0.82515	0.673676	0.883883	0.72304	0.924272	0.661367	0.798969	0.787006	0.586279	0.998493	0.696883	0.524135	0.884438	0.63213	0.675846	0.702765	0.82543	0.663486	0.728184	0.57802	0.725067	0.813093	0.8844	0.712262
TCGA-CN-4739-01A-02R-1514-07	0.548295	0.712159	0.768508	0.703599	0.647541	0.840499	0.692853	0.830516	0.687944	0.878764	0.719283	0.766077	0.777504	0.622481	0.985368	0.752584	0.507625	0.8392	0.656617	0.659664	0.709197	0.871374	0.69462	0.611862	0.599727	0.762073	0.81117	0.712596	0.762537
TCGA-CN-6024-01A-11R-1686-07	0.476493	0.741269	0.699792	0.467383	0.611636	0.495103	0.607588	0.550619	0.719575	0.793192	0.640312	0.602199	0.791942	0.556391	0.969928	0.629646	0.421111	0.829252	0.521568	0.569457	0.568161	0.729653	0.461136	0.556498	0.563886	0.58594	0.783496	0.693015	0.750269
TCGA-CV-6940-01A-11R-1915-07	0.538105	0.727273	0.661362	0.548899	0.632642	0.643812	0.635117	0.831103	0.685649	0.841488	0.760525	0.675643	0.793535	0.621965	0.970067	0.686022	0.557583	0.824141	0.619412	0.613835	0.656139	0.832266	0.570206	0.605897	0.579991	0.679633	0.785266	0.653256	0.749033
TCGA-UF-A7JF-01A-11R-A34R-07	0.682491	0.697209	0.648458	0.542633	0.630033	0.637485	0.639806	0.818374	0.723916	0.900483	0.805978	0.707682	0.810554	0.561512	0.981321	0.651468	0.559957	0.821844	0.630598	0.599375	0.637581	0.868401	0.505939	0.609057	0.51602	0.66896	0.774085	0.699183	0.679936
TCGA-CN-4723-01A-01R-1436-07	0.700804	0.768179	0.662836	0.583004	0.64614	0.759004	0.66367	0.809252	0.737113	0.869544	0.560609	0.780509	0.808514	0.609179	0.996979	0.699116	0.521044	0.878412	0.604689	0.63387	0.682811	0.892822	0.642355	0.669539	0.561743	0.728225	0.81677	0.83908	0.727048
TCGA-HD-8314-01A-11R-2403-07	0.58179	0.762126	0.630257	0.641361	0.62176	0.758038	0.653209	0.757321	0.771685	0.867661	0.671904	0.728446	0.814125	0.680623	0.981435	0.718689	0.525947	0.858497	0.669488	0.664315	0.693441	0.950024	0.644594	0.596889	0.531315	0.747261	0.786863	0.805449	0.753212
TCGA-D6-A6EK-01A-11R-A31N-07	0.791526	0.80758	0.667748	0.653357	0.673603	0.843523	0.709948	0.922047	0.886929	0.914899	0.812655	0.829707	0.787646	0.541979	0.995508	0.708032	0.623216	0.857671	0.735351	0.705245	0.765388	0.878235	0.725055	0.742741	0.689238	0.769616	0.81426	0.84067	0.727007
TCGA-CV-6952-01A-11R-1915-07	0.803011	0.860386	0.691343	0.600333	0.673976	0.774988	0.687265	0.863996	0.772151	0.894556	0.706633	0.802421	0.798643	0.650289	0.998248	0.713013	0.522558	0.884625	0.708859	0.700874	0.691179	0.859507	0.658657	0.699787	0.550816	0.727372	0.817333	0.912092	0.719723
TCGA-BA-6871-01A-11R-1873-07	0.666799	0.780501	0.680876	0.542494	0.636804	0.796384	0.65909	0.943302	0.711309	0.866188	0.502662	0.78449	0.750051	0.656175	0.99453	0.699041	0.608626	0.839107	0.611327	0.63625	0.689434	0.879049	0.661968	0.63453	0.525894	0.715875	0.810291	0.80249	0.732149
TCGA-CR-7390-01A-11R-2016-07	0.692435	0.686216	0.64503	0.53457	0.644956	0.569305	0.614004	0.577397	0.745507	0.83474	0.412289	0.577458	0.795226	0.590426	0.979815	0.746218	0.220242	0.772568	0.576029	0.579509	0.606841	0.767288	0.603819	0.571873	0.528099	0.651935	0.800891	0.678959	0.709626
TCGA-CX-7086-01A-11R-2081-07	0.759798	0.739165	0.656317	0.5376	0.638879	0.717176	0.633514	0.766018	0.641174	0.842547	0.678551	0.717595	0.751732	0.460903	0.990899	0.724186	0.411631	0.864043	0.66971	0.623049	0.656255	0.794834	0.568535	0.643045	0.556366	0.678428	0.793156	0.85705	0.748413
TCGA-CR-7388-01A-11R-2016-07	0.736575	0.748527	0.699022	0.689928	0.681043	0.771252	0.691095	0.803893	0.819162	0.891399	0.719851	0.757057	0.80088	0.767943	0.991053	0.790587	0.42726	0.857812	0.711612	0.666942	0.751319	0.917776	0.717864	0.656733	0.604737	0.778153	0.823399	0.782748	0.818048
TCGA-CV-A6JU-01A-11R-A31N-07	0.526173	0.691516	0.634544	0.486544	0.599952	0.575048	0.613148	0.621969	0.698297	0.913747	0.631719	0.683118	0.789262	0.617711	0.992812	0.584469	0.0963927	0.861722	0.608351	0.592753	0.635836	0.800577	0.630043	0.531323	0.507567	0.644356	0.772523	0.836819	0.699222
TCGA-D6-A6EM-01A-21R-A31N-07	0.74775	0.866063	0.71727	0.623441	0.668897	0.868909	0.717894	0.948257	0.838549	0.941497	0.552316	0.854803	0.821252	0.720602	0.998697	0.685841	0.594466	0.872569	0.756266	0.742354	0.744352	0.905375	0.685269	0.724537	0.655942	0.769857	0.793014	0.895767	0.75181
TCGA-CQ-A4CG-01A-11R-A266-07	0.719274	0.778534	0.661255	0.475935	0.635208	0.568568	0.616572	0.814326	0.643289	0.823817	0.631976	0.689913	0.764044	0.490571	0.993264	0.676724	0.452771	0.887682	0.556728	0.581632	0.546452	0.765992	0.660928	0.614585	0.394141	0.617703	0.793384	0.823614	0.644516
TCGA-P3-A6T7-01A-11R-A34R-07	0.561536	0.811451	0.637418	0.495582	0.643531	0.748991	0.633701	0.814638	0.657803	0.86705	0.605836	0.77173	0.773516	0.426767	0.996252	0.697966	0.55615	0.875363	0.57006	0.634549	0.600657	0.756996	0.635651	0.658028	0.496041	0.660822	0.77689	0.886228	0.689338
TCGA-CV-A6JY-01A-11R-A31N-07	0.45209	0.609971	0.564879	0.522845	0.608641	0.634562	0.558794	0.695373	0.615841	0.844146	0.673559	0.636294	0.764907	0.705444	0.986117	0.662651	0.410033	0.81945	0.563812	0.549297	0.608763	0.751863	0.533611	0.554104	0.495832	0.642653	0.78573	0.765729	0.739888
TCGA-CV-7415-01A-11R-2081-07	0.572928	0.910441	0.729663	0.548486	0.629596	0.815494	0.694611	0.873331	0.580472	0.933265	0.643006	0.802241	0.810148	0.446427	0.998908	0.701202	0.485975	0.890456	0.67148	0.697964	0.705475	0.870434	0.688104	0.659503	0.518249	0.707672	0.806683	0.888008	0.721744
TCGA-CN-6018-01A-11R-1686-07	0.774546	0.83954	0.726243	0.620099	0.689756	0.783323	0.704186	0.914914	0.785192	0.91289	0.588703	0.809405	0.827822	0.542956	0.998215	0.759427	0.553302	0.895505	0.693639	0.689904	0.693923	0.92545	0.672796	0.707451	0.608318	0.748358	0.817384	0.857406	0.796842
TCGA-CV-5971-01A-11R-1686-07	0.578426	0.806987	0.675683	0.653548	0.671459	0.799586	0.681313	0.86432	0.863196	0.901	0.726677	0.807723	0.807673	0.857737	0.991561	0.728056	0.510344	0.860742	0.767576	0.692298	0.730866	0.940393	0.704649	0.688055	0.638694	0.779739	0.812925	0.765067	0.838565
TCGA-CN-6010-01A-11R-1686-07	0.679291	0.808472	0.663327	0.670528	0.629479	0.741266	0.649983	0.811045	0.676366	0.872775	0.647534	0.734743	0.793692	0.698353	0.98884	0.702718	0.502431	0.846584	0.647403	0.641968	0.661003	0.838492	0.679931	0.574656	0.423872	0.714237	0.801551	0.718043	0.801512
TCGA-CR-6478-01A-11R-1873-07	0.848179	0.934741	0.706794	0.697078	0.704981	0.888959	0.743129	0.969735	0.868335	0.933644	0.631201	0.859076	0.823338	0.617492	1	0.773873	0.629259	0.898923	0.784256	0.766081	0.765638	0.963822	0.760312	0.786854	0.640105	0.81286	0.83639	0.859709	0.786256
TCGA-CQ-7071-01A-12R-A30B-07	0.745024	0.796261	0.730267	0.600218	0.668592	0.774581	0.68229	0.888788	0.74204	0.887726	0.721138	0.797837	0.786923	0.592415	0.99507	0.708756	0.547421	0.862327	0.641435	0.68152	0.696286	0.869367	0.652635	0.699777	0.563055	0.720331	0.825007	0.80473	0.624276
TCGA-H7-8501-01A-11R-2403-07	0.557382	0.90367	0.725881	0.63308	0.686204	0.9501	0.755292	0.982149	0.785238	0.949022	0.537946	0.875885	0.814106	0.567956	0.999899	0.721126	0.741348	0.87726	0.753835	0.809873	0.755549	0.923519	0.732297	0.798277	0.572744	0.804101	0.830195	0.903019	0.675471
TCGA-CR-6473-01A-11R-1873-07	0.734455	0.761847	0.727096	0.581739	0.661066	0.721394	0.669449	0.764025	0.718119	0.83525	0.701124	0.742017	0.718656	0.423012	0.985138	0.694548	0.478749	0.849438	0.630301	0.603527	0.691606	0.818569	0.600105	0.716567	0.562344	0.686572	0.806428	0.815021	0.669088
TCGA-QK-A6VB-01A-12R-A34R-07	0.452613	0.665833	0.594531	0.486353	0.558124	0.581249	0.542018	0.641213	0.651126	0.772869	0.463463	0.573368	0.771377	0.366809	0.98273	0.625919	0.368119	0.803475	0.520568	0.494981	0.505075	0.735066	0.469561	0.500204	0.475932	0.573055	0.743778	0.723278	0.662896
TCGA-CQ-A4C7-01A-11R-A24Z-07	0.536653	0.830858	0.628941	0.53025	0.646091	0.691231	0.639178	0.841459	0.714238	0.883897	0.644051	0.765101	0.76643	0.479036	0.998485	0.681759	0.484016	0.867667	0.599346	0.652133	0.630696	0.813766	0.640519	0.685113	0.56311	0.662614	0.807569	0.869019	0.72976
TCGA-CV-A6JZ-01A-11R-A31N-07	0.735787	0.847918	0.693957	0.63273	0.656438	0.941434	0.716965	0.941376	0.80128	0.924376	0.743712	0.848404	0.834561	0.537081	0.9989	0.731128	0.50616	0.886779	0.72992	0.771731	0.739684	0.958384	0.719959	0.755128	0.608427	0.794215	0.819847	0.842047	0.716959
TCGA-CV-A6K0-01B-21R-A31N-07	0.745342	0.882072	0.693288	0.651595	0.679456	0.846344	0.708644	0.855317	0.8281	0.929841	0.868078	0.815017	0.799295	0.624888	0.995678	0.697527	0.581317	0.882949	0.76162	0.721036	0.740618	0.946796	0.716719	0.7235	0.633527	0.781813	0.833306	0.862303	0.760102
TCGA-BB-4223-01A-01R-1436-07	0.714715	0.759668	0.700702	0.732591	0.618962	0.928119	0.68969	0.900667	0.671653	0.862746	0.763895	0.834111	0.764196	0.482225	0.988636	0.72305	0.541327	0.84409	0.685283	0.694375	0.741761	0.918564	0.757002	0.667601	0.542665	0.788989	0.813288	0.802135	0.709815
TCGA-BA-5555-01A-01R-1514-07	0.752036	0.749784	0.652963	0.599594	0.638099	0.760732	0.669478	0.859466	0.643764	0.931246	0.655788	0.757993	0.79468	0.692519	0.998045	0.669931	0.508002	0.870701	0.648497	0.634903	0.694065	0.858872	0.616111	0.676433	0.606172	0.706408	0.806783	0.787519	0.79031
TCGA-CV-7104-01A-11R-2016-07	0.77585	0.849799	0.730192	0.603117	0.68613	0.750643	0.707472	0.807117	0.826008	0.906474	0.804307	0.782144	0.818469	0.747362	0.998223	0.758753	0.414713	0.900056	0.717215	0.709822	0.712758	0.935336	0.667788	0.727955	0.64859	0.742756	0.830168	0.91113	0.760538
TCGA-CV-7407-01A-11R-2081-07	0.759867	0.863424	0.640656	0.566514	0.635426	0.757682	0.685565	0.915824	0.659667	0.915173	0.874111	0.784556	0.795929	0.472169	0.998739	0.698825	0.694028	0.901081	0.667984	0.699502	0.695978	0.940494	0.598844	0.669644	0.606164	0.730875	0.812712	0.816637	0.707999
TCGA-CV-7434-01A-11R-2132-07	0.578811	0.906646	0.680519	0.48141	0.654527	0.779003	0.668559	0.883608	0.676874	0.843399	0.388036	0.775526	0.797181	0.472613	0.998172	0.709638	0.593503	0.87261	0.664193	0.687113	0.662251	0.857322	0.653972	0.684145	0.524126	0.679908	0.795144	0.87942	0.652161
TCGA-HD-A634-01A-11R-A28V-07	0.841086	0.556754	0.465983	0.564562	0.538757	0.528214	0.454702	0.5339	0.645991	0.786251	0.356955	0.540818	0.665807	0.451112	0.960294	0.616574	0.0827883	0.672746	0.485664	0.455352	0.460935	0.634461	0.374971	0.429707	0.368171	0.528823	0.724035	0.53288	0.584362
TCGA-CV-7252-01A-11R-2016-07	0.55932	0.802126	0.716009	0.567419	0.660706	0.724622	0.651704	0.856826	0.715258	0.910758	0.784496	0.740524	0.811928	0.411048	0.995865	0.702819	0.301089	0.878541	0.67714	0.645684	0.66539	0.853027	0.616372	0.629471	0.546186	0.706602	0.805056	0.814718	0.707078
TCGA-CQ-6227-01A-11R-1915-07	0.5146	0.766644	0.653167	0.628737	0.663047	0.68381	0.625928	0.733781	0.758971	0.87561	0.676243	0.738064	0.798316	0.708241	0.987989	0.712828	0.525667	0.869186	0.656066	0.605793	0.64204	0.830334	0.621386	0.663683	0.508752	0.707847	0.790381	0.771844	0.763806
TCGA-CV-5976-01A-11R-1686-07	0.498269	0.72259	0.618803	0.51137	0.613997	0.610523	0.603198	0.772834	0.692921	0.866006	0.622441	0.684427	0.782084	0.566541	0.994393	0.686775	0.579377	0.863739	0.582271	0.604946	0.603339	0.805177	0.522917	0.597303	0.499719	0.635812	0.78554	0.816894	0.733537
TCGA-CN-4740-01A-01R-1436-07	0.731073	0.810027	0.718531	0.610079	0.681378	0.809624	0.694177	0.877425	0.870125	0.910287	0.675791	0.776463	0.861131	0.75341	0.991056	0.791276	0.506656	0.872512	0.68948	0.691749	0.707459	0.964813	0.68143	0.647745	0.585751	0.762965	0.813424	0.753274	0.790444
TCGA-CV-A45U-01A-12R-A24H-07	0.592622	0.703555	0.607716	0.51766	0.604455	0.799942	0.630891	0.845408	0.600237	0.84951	0.608126	0.761008	0.752844	0.45815	0.996161	0.643813	0.494705	0.835925	0.578914	0.626724	0.675285	0.77824	0.64015	0.655671	0.597431	0.677184	0.797231	0.799836	0.639375
TCGA-CV-7435-01A-11R-2132-07	0.775016	0.808718	0.714439	0.620721	0.676671	0.71095	0.689248	0.863041	0.803227	0.883909	0.564241	0.770757	0.838613	0.69352	0.995391	0.717616	0.50762	0.898394	0.685289	0.687433	0.709557	0.929923	0.663323	0.707698	0.54858	0.7388	0.824526	0.85383	0.745736
TCGA-H7-8502-01A-11R-2403-07	0.748693	0.754569	0.658014	0.504591	0.632453	0.68254	0.630464	0.771023	0.646676	0.848823	0.458617	0.730116	0.79127	0.525807	0.997056	0.704757	0.423998	0.866932	0.625961	0.62881	0.626913	0.828784	0.614244	0.639832	0.472215	0.659104	0.791945	0.79386	0.735459
TCGA-CV-A461-01A-41R-A266-07	0.752649	0.836281	0.726936	0.655319	0.659567	0.928449	0.736216	0.955075	0.802232	0.9314	0.802671	0.8605	0.817036	0.680389	0.998637	0.713798	0.634939	0.894748	0.725723	0.738736	0.742984	0.923824	0.753325	0.743595	0.633569	0.775747	0.816489	0.908218	0.693381
TCGA-BB-4217-01A-11R-2081-07	0.611834	0.753873	0.692653	0.831677	0.673903	0.792344	0.702723	0.849551	0.749016	0.931599	0.657785	0.775162	0.750477	0.621514	0.988716	0.753743	0.567286	0.86493	0.728568	0.685708	0.791496	0.9362	0.82698	0.688731	0.620953	0.846514	0.82024	0.783543	0.796259
TCGA-CQ-7063-01A-11R-2403-07	0.816198	0.918496	0.718404	0.646766	0.690983	0.887053	0.751252	0.926441	0.765782	0.93232	0.819782	0.845166	0.850804	0.742268	0.998239	0.748334	0.576037	0.89071	0.777086	0.771401	0.766684	0.93808	0.708144	0.787599	0.690764	0.779532	0.831089	0.868545	0.73809
TCGA-CV-7427-01A-11R-2081-07	0.748772	0.902552	0.696903	0.616073	0.68835	0.864564	0.720689	0.924474	0.775414	0.947959	0.739085	0.832274	0.791064	0.675021	0.999026	0.774057	0.557803	0.90773	0.741706	0.760452	0.730352	0.938868	0.683783	0.735742	0.674702	0.767928	0.829817	0.851838	0.759474
TCGA-BA-5152-01A-02R-1873-07	0.754661	0.830578	0.694345	0.651107	0.694213	0.842735	0.711669	0.908201	0.84545	0.923405	0.782341	0.809975	0.806208	0.719604	0.995543	0.758252	0.633137	0.894499	0.757208	0.735215	0.748952	0.938538	0.714429	0.719277	0.643629	0.768056	0.830903	0.849601	0.731431
TCGA-IQ-A6SG-01A-12R-A34R-07	0.547067	0.653009	0.628975	0.491297	0.633896	0.64216	0.601646	0.706305	0.733409	0.797271	0.52954	0.638468	0.799419	0.535046	0.966322	0.668788	0.451718	0.819718	0.547115	0.554818	0.609961	0.782332	0.567007	0.590864	0.499418	0.626817	0.784091	0.731602	0.717853
TCGA-WA-A7GZ-01A-11R-A34R-07	0.779349	0.658908	0.602915	0.45081	0.608288	0.524936	0.571061	0.596011	0.698105	0.819533	0.648097	0.589527	0.751195	0.586862	0.995551	0.614055	0.0139173	0.860216	0.500266	0.542607	0.528469	0.738191	0.490514	0.458236	0.554105	0.591477	0.785782	0.840314	0.600551
TCGA-CV-6003-01A-11R-1686-07	0.72069	0.788584	0.623495	0.483165	0.626464	0.648996	0.620301	0.728531	0.716955	0.848097	0.611186	0.685187	0.802413	0.557925	0.995899	0.632793	0.49129	0.867557	0.626542	0.577558	0.622651	0.74429	0.548522	0.672626	0.483003	0.617525	0.792958	0.836024	0.603205
TCGA-CR-7389-01A-11R-2016-07	0.790636	0.7505	0.668868	0.623416	0.673543	0.658246	0.657815	0.726923	0.803109	0.92163	0.736861	0.672077	0.783833	0.709625	0.995797	0.738604	0.457464	0.880603	0.661388	0.637859	0.70144	0.900547	0.596719	0.581978	0.646965	0.72694	0.812236	0.857831	0.829521
TCGA-DQ-5629-01A-01R-1873-07	0.579918	0.731251	0.590469	0.557775	0.598034	0.610243	0.606459	0.709992	0.636398	0.81941	0.517241	0.643253	0.761378	0.407131	0.988897	0.665789	0.384052	0.828663	0.578496	0.549159	0.593562	0.73715	0.579511	0.57787	0.395921	0.627142	0.78851	0.72563	0.773718
TCGA-CR-7374-01A-11R-2016-07	0.61965	0.696435	0.645832	0.667194	0.627796	0.727264	0.648348	0.760965	0.759424	0.877979	0.649053	0.697916	0.739179	0.668264	0.994109	0.702976	0.398121	0.838492	0.677578	0.619271	0.7073	0.876914	0.632913	0.616792	0.610332	0.739088	0.817704	0.783212	0.760334
TCGA-CV-5979-01A-11R-1686-07	0.530206	0.721964	0.654806	0.511808	0.627095	0.617384	0.614571	0.797952	0.680003	0.884856	0.712258	0.683434	0.764076	0.513975	0.995883	0.642838	0.597839	0.864239	0.635256	0.607843	0.605554	0.799688	0.545404	0.639305	0.474922	0.639344	0.786271	0.848045	0.679522
TCGA-BA-5556-01A-01R-1514-07	0.790702	0.877911	0.693396	0.688114	0.710004	0.92296	0.737048	0.961643	0.818122	0.9343	0.734305	0.863049	0.800261	0.690502	0.99923	0.752214	0.59684	0.903476	0.828634	0.768814	0.754331	0.944941	0.778092	0.773456	0.61156	0.806427	0.840452	0.915878	0.77211
TCGA-CN-A63W-01A-11R-A30B-07	0.71578	0.676085	0.65465	0.411239	0.644208	0.709807	0.61671	0.858733	0.667944	0.882705	0.498252	0.74628	0.794803	0.580468	0.996481	0.614184	0.514017	0.878801	0.543374	0.553709	0.621658	0.712297	0.569776	0.703416	0.551107	0.626184	0.786852	0.84806	0.664956
TCGA-BB-4228-01A-01R-1436-07	0.52056	0.73518	0.691939	0.565812	0.630992	0.759969	0.659355	0.789703	0.68279	0.875356	0.811475	0.761507	0.766934	0.59071	0.985687	0.627808	0.586164	0.816066	0.604923	0.623865	0.662769	0.863649	0.643488	0.600626	0.447878	0.701769	0.814058	0.735001	0.638619
TCGA-CQ-6229-01A-11R-1915-07	0.742823	0.821931	0.69499	0.596309	0.654726	0.806727	0.655539	0.846539	0.748841	0.923955	0.716867	0.797667	0.795292	0.68348	0.997148	0.705988	0.590284	0.879689	0.682875	0.675722	0.668163	0.832698	0.664052	0.724449	0.525815	0.712183	0.803191	0.855963	0.721885
TCGA-D6-6825-01A-21R-1915-07	0.74942	0.862333	0.713458	0.669205	0.693865	0.893076	0.724407	0.910856	0.809795	0.919864	0.734239	0.841795	0.817184	0.717598	0.998713	0.783562	0.616641	0.894192	0.76128	0.754767	0.768142	0.938207	0.73388	0.74465	0.664892	0.795495	0.83894	0.853746	0.770684
TCGA-CV-7250-01A-11R-2016-07	0.526353	0.756758	0.68562	0.554838	0.650389	0.749449	0.647041	0.807388	0.677503	0.868013	0.527498	0.754536	0.799749	0.454513	0.994014	0.701761	0.455051	0.857435	0.615206	0.618334	0.664107	0.818315	0.605154	0.678946	0.573434	0.695488	0.802701	0.805798	0.74134
TCGA-RS-A6TO-01A-32R-A34R-07	0.563073	0.827461	0.638269	0.483886	0.630168	0.798366	0.661837	0.861221	0.722474	0.928095	0.379242	0.788819	0.809679	0.349025	0.997054	0.682354	0.396707	0.870826	0.61033	0.65641	0.663711	0.913177	0.646985	0.678399	0.537758	0.685819	0.80065	0.886826	0.524118
TCGA-CR-7380-01A-11R-2016-07	0.829176	0.781773	0.68898	0.622226	0.670507	0.733948	0.657674	0.753721	0.79816	0.883109	0.684304	0.706164	0.819763	0.833625	0.995104	0.732384	0.552087	0.871212	0.693921	0.655671	0.67715	0.916963	0.580479	0.64597	0.524603	0.730798	0.810101	0.81689	0.780133
TCGA-CR-6474-01A-11R-1873-07	0.758958	0.797142	0.700239	0.601891	0.68722	0.716185	0.679392	0.815928	0.813157	0.885926	0.71062	0.770694	0.823498	0.765744	0.99228	0.754254	0.472174	0.875349	0.689693	0.671745	0.71368	0.901386	0.684965	0.663063	0.545816	0.734874	0.826307	0.766873	0.772542
TCGA-CV-A6JT-01A-11R-A31N-07	0.734402	0.84505	0.648527	0.527511	0.659741	0.788354	0.661072	0.853401	0.788675	0.901641	0.888393	0.774507	0.81934	0.654238	0.990767	0.71572	0.596005	0.871205	0.695113	0.704838	0.686634	0.876126	0.620994	0.66939	0.605606	0.706413	0.792311	0.873547	0.653772
TCGA-CV-6933-01A-11R-1915-07	0.822574	0.80239	0.717219	0.534045	0.641453	0.629836	0.660701	0.703162	0.808099	0.887295	0.704984	0.658334	0.86366	0.423283	0.985845	0.72857	0.376438	0.846277	0.606703	0.643084	0.640393	0.953886	0.511625	0.606706	0.52069	0.70313	0.792403	0.767826	0.730701
TCGA-T2-A6WZ-01A-21R-A34R-07	0.791017	0.758519	0.609458	0.610786	0.640862	0.707265	0.608837	0.82689	0.695793	0.90603	0.65842	0.743019	0.794397	0.574755	0.988099	0.628935	0.245235	0.848235	0.647641	0.584934	0.661438	0.81003	0.647321	0.626037	0.531512	0.695094	0.772304	0.887733	0.686674
TCGA-IQ-A6SH-01A-12R-A34R-07	0.593287	0.789001	0.676502	0.575446	0.664665	0.774403	0.692768	0.933286	0.818647	0.907579	0.617586	0.803223	0.81581	0.570856	0.997842	0.686905	0.553706	0.881708	0.684265	0.693791	0.702472	0.854196	0.664321	0.755667	0.649775	0.718576	0.805448	0.915919	0.683828
TCGA-CR-6484-01A-11R-1873-07	0.734971	0.854906	0.715479	0.677995	0.686214	0.860981	0.724799	0.877501	0.745657	0.953493	0.762041	0.824464	0.850117	0.704825	0.999145	0.746436	0.425202	0.892428	0.730662	0.754748	0.745758	0.973326	0.749352	0.698376	0.688482	0.794082	0.826403	0.835473	0.744869
TCGA-QK-A6IF-01A-11R-A31N-07	0.729764	0.793397	0.711991	0.819831	0.658185	0.865047	0.728145	0.894672	0.657854	0.922685	0.674875	0.823846	0.738998	0.611672	0.990203	0.71085	0.559304	0.849123	0.739672	0.729953	0.777578	0.948855	0.801063	0.667492	0.58198	0.825941	0.812517	0.78783	0.708898
TCGA-CX-7082-01A-11R-2016-07	0.735225	0.736499	0.652791	0.498332	0.625683	0.756615	0.63514	0.762685	0.719975	0.866454	0.474693	0.749366	0.764274	0.55905	0.994597	0.679217	0.392887	0.842061	0.607331	0.614828	0.641401	0.831808	0.62785	0.6543	0.55206	0.664266	0.784569	0.777753	0.717445
TCGA-CN-5359-01A-01R-1436-07	0.609551	0.812112	0.719721	0.653681	0.690487	0.866394	0.711943	0.880699	0.832489	0.886849	0.642684	0.801619	0.857039	0.622417	0.992996	0.818697	0.571129	0.887028	0.760385	0.714552	0.750195	0.963492	0.709511	0.698836	0.611337	0.798502	0.827944	0.866199	0.784989
TCGA-CN-4741-01A-01R-1436-07	0.579821	0.721797	0.6514	0.531461	0.615936	0.72579	0.624359	0.777065	0.648418	0.888554	0.738802	0.709764	0.770012	0.485596	0.995415	0.675083	0.394444	0.843071	0.580101	0.602162	0.630633	0.862404	0.524841	0.566219	0.541951	0.671564	0.78078	0.772361	0.67956
TCGA-CN-5358-01A-01R-1514-07	0.764869	0.819595	0.714198	0.733478	0.711692	0.89981	0.715423	0.921186	0.906243	0.926982	0.756798	0.832716	0.839291	0.791169	0.993539	0.809618	0.558762	0.889914	0.773785	0.745442	0.773844	0.971217	0.770702	0.738066	0.665329	0.834754	0.842728	0.818903	0.800744
TCGA-KU-A66S-01A-21R-A30B-07	0.597381	0.692074	0.590999	0.448342	0.618944	0.664243	0.592908	0.834494	0.688464	0.862084	0.450718	0.706916	0.691332	0.629155	0.991204	0.624732	0.377311	0.817543	0.548634	0.569484	0.605359	0.820907	0.557731	0.573266	0.586765	0.648116	0.767132	0.775424	0.63388
TCGA-BA-A6DG-01A-21R-A30B-07	0.691831	0.817846	0.672875	0.515977	0.666684	0.747213	0.654247	0.800779	0.81568	0.878715	0.654042	0.716774	0.833818	0.460996	0.984421	0.778604	0.446527	0.840449	0.620551	0.660369	0.687706	0.860422	0.636391	0.645632	0.550915	0.716541	0.810602	0.759684	0.709856
TCGA-CV-5978-01A-11R-1686-07	0.794644	0.87397	0.722839	0.619078	0.645759	0.654155	0.670099	0.739844	0.831852	0.873864	0.652029	0.693259	0.877147	0.686421	0.990385	0.741251	0.46907	0.87648	0.647985	0.685707	0.689395	0.963568	0.627145	0.595406	0.577124	0.738649	0.820985	0.829054	0.73334
TCGA-CN-4737-01A-01R-1436-07	0.677494	0.715286	0.646549	0.511495	0.627794	0.592913	0.631086	0.637115	0.785779	0.833621	0.675508	0.641478	0.815438	0.705402	0.986168	0.690817	0.25499	0.841508	0.616668	0.60842	0.641295	0.879709	0.543074	0.560834	0.445399	0.668558	0.783678	0.789866	0.769213
TCGA-CQ-7072-01A-21R-A30B-07	0.556828	0.699401	0.626316	0.503532	0.613616	0.382453	0.611048	0.784174	0.830738	0.888348	0.73655	0.585262	0.806353	0.46492	0.982836	0.637125	0.349998	0.795952	0.549376	0.557872	0.588571	0.880497	0.457449	0.590351	0.53871	0.652707	0.803471	0.712966	0.714958
TCGA-F7-A50I-01A-11R-A28V-07	0.720906	0.822167	0.630429	0.570642	0.669255	0.801772	0.660367	0.819722	0.745247	0.907431	0.706784	0.784719	0.754992	0.590194	0.995164	0.668549	0.535683	0.878226	0.596781	0.666484	0.645744	0.784542	0.642293	0.703999	0.606939	0.692874	0.806988	0.805767	0.701322
TCGA-BA-5151-01A-01R-1436-07	0.762834	0.782014	0.662109	0.623431	0.691138	0.732067	0.657425	0.77336	0.812509	0.868854	0.62686	0.728079	0.803161	0.738665	0.993515	0.796225	0.54051	0.888452	0.680641	0.659312	0.689069	0.892314	0.631184	0.67855	0.610157	0.73908	0.82286	0.849252	0.748044
TCGA-DQ-5624-01A-01R-1873-07	0.764063	0.784071	0.692171	0.598634	0.669253	0.661448	0.669894	0.700789	0.811049	0.891398	0.887925	0.687996	0.80783	0.710523	0.986113	0.747189	0.471618	0.861297	0.635662	0.650667	0.687974	0.890357	0.608718	0.651888	0.611772	0.704148	0.815539	0.804008	0.721766
TCGA-CQ-6218-01A-11R-1915-07	0.753058	0.815193	0.696621	0.566174	0.689413	0.749957	0.68149	0.836562	0.760661	0.886086	0.658686	0.777476	0.817056	0.751931	0.996912	0.746834	0.558884	0.89974	0.705401	0.68166	0.696648	0.866826	0.635818	0.663966	0.420383	0.72397	0.816306	0.92287	0.741356
TCGA-MZ-A5BI-01A-31R-A34R-07	0.902955	0.88553	0.794424	0.697199	0.713309	0.860523	0.761532	0.874191	0.769449	0.96231	0.8505	0.852224	0.765793	0.58456	0.995441	0.735192	0.532287	0.857444	0.72064	0.736205	0.800038	0.963441	0.762017	0.739342	0.698377	0.800401	0.840877	0.853445	0.722265
TCGA-CN-A49B-01A-31R-A24H-07	0.756877	0.825277	0.710502	0.553805	0.681396	0.839533	0.720197	0.891869	0.758234	0.917436	0.611232	0.81547	0.802721	0.541647	0.998714	0.716901	0.652831	0.887661	0.685748	0.733491	0.745924	0.931397	0.697195	0.750269	0.646805	0.756499	0.821851	0.90168	0.680003
TCGA-CV-7440-01A-11R-2132-07	0.742628	0.750268	0.689733	0.517709	0.659911	0.665819	0.632422	0.778687	0.715733	0.872982	0.545483	0.725009	0.764128	0.515144	0.994231	0.701535	0.486927	0.864466	0.609678	0.598652	0.643824	0.804745	0.561753	0.646087	0.610544	0.677801	0.805209	0.826382	0.779021
TCGA-CV-5439-01A-01R-1686-07	0.52594	0.757962	0.703406	0.611977	0.634376	0.804516	0.651317	0.813975	0.625118	0.932351	0.765194	0.774437	0.779373	0.584167	0.998316	0.695638	0.523892	0.865337	0.67863	0.639267	0.670112	0.816358	0.666864	0.653488	0.590544	0.705964	0.800757	0.782437	0.764758
TCGA-BB-A5HY-01A-11R-A28V-07	0.700822	0.72186	0.623299	0.469148	0.628454	0.633902	0.597253	0.739422	0.711912	0.822373	0.53619	0.709787	0.756383	0.394914	0.992867	0.678883	0.384038	0.822005	0.523654	0.565251	0.627025	0.737836	0.578631	0.646532	0.589149	0.616107	0.780052	0.812376	0.615553
TCGA-CN-5361-01A-01R-1436-07	0.559697	0.781898	0.685718	0.521996	0.633257	0.652503	0.650121	0.887192	0.669975	0.912468	0.74444	0.740563	0.814582	0.673845	0.997875	0.657534	0.62407	0.882448	0.630499	0.643657	0.641648	0.879582	0.602057	0.627492	0.572945	0.676964	0.798489	0.827318	0.754553
TCGA-CV-7432-01A-11R-2132-07	0.763316	0.744259	0.651861	0.519313	0.63242	0.635833	0.611176	0.756316	0.712007	0.836516	0.534747	0.719981	0.761953	0.624611	0.996709	0.682893	0.527096	0.847735	0.599345	0.598677	0.629875	0.761469	0.578063	0.636744	0.554841	0.634019	0.789101	0.774026	0.709152
TCGA-CV-7101-01A-11R-2016-07	0.692017	0.791415	0.653531	0.668369	0.658064	0.729196	0.68117	0.837487	0.753734	0.901149	0.650917	0.769658	0.832864	0.676952	0.990722	0.722363	0.538899	0.874781	0.67104	0.662933	0.68047	0.905883	0.648112	0.610222	0.586901	0.737929	0.810757	0.771307	0.802111
TCGA-CR-7373-01A-11R-2016-07	0.808121	0.899405	0.695815	0.617085	0.685281	0.827005	0.708114	0.966521	0.795539	0.905287	0.588499	0.835037	0.806923	0.58017	0.998866	0.709327	0.662326	0.880261	0.703245	0.760128	0.751332	0.919987	0.690149	0.780887	0.669927	0.767961	0.846375	0.871319	0.687577
TCGA-CV-7099-01A-41R-2016-07	0.762397	0.883988	0.699513	0.579878	0.675031	0.836332	0.708135	0.919314	0.734052	0.88935	0.634272	0.811851	0.815398	0.668582	0.997409	0.73177	0.598452	0.913249	0.69026	0.732949	0.684907	0.899403	0.657058	0.735969	0.608471	0.735506	0.820644	0.862752	0.712374
TCGA-CR-7397-01A-11R-2016-07	0.591786	0.760476	0.710104	0.596571	0.661169	0.730695	0.681417	0.774841	0.738099	0.904171	0.779096	0.737247	0.821684	0.738716	0.991466	0.729037	0.534354	0.883084	0.689046	0.655889	0.703634	0.929288	0.628083	0.627371	0.54711	0.735476	0.812478	0.789951	0.79178
TCGA-P3-A6T6-01A-11R-A34R-07	0.504113	0.651897	0.524953	0.483076	0.578678	0.586483	0.51075	0.68472	0.587245	0.826544	0.475012	0.667537	0.696395	0.330708	0.992801	0.629955	0.343671	0.799702	0.591369	0.459627	0.516036	0.705969	0.601412	0.51117	0.415757	0.588681	0.737807	0.735923	0.691629
TCGA-UF-A7JC-01A-21R-A34R-07	0.500518	0.763271	0.595155	0.473215	0.607217	0.609456	0.566793	0.69288	0.600318	0.809434	0.575678	0.614791	0.769764	0.466678	0.994225	0.670154	0.399494	0.847052	0.537105	0.566166	0.540605	0.701726	0.523296	0.494168	0.346047	0.577053	0.7733	0.812908	0.670593
TCGA-CV-7255-01A-11R-2016-07	0.463387	0.75764	0.685067	0.465453	0.62875	0.527071	0.605927	0.743891	0.594976	0.8079	0.584796	0.621964	0.772482	0.579441	0.993056	0.670312	0.526326	0.860407	0.54473	0.529085	0.593943	0.684827	0.423097	0.552467	0.543201	0.605349	0.777977	0.817896	0.706043
TCGA-QK-A6IG-01A-11R-A31N-07	0.696509	0.859994	0.630201	0.550218	0.660539	0.808861	0.671125	0.923536	0.760946	0.875416	0.551637	0.817283	0.771518	0.420618	0.997512	0.696522	0.575914	0.867448	0.688002	0.703877	0.693552	0.85102	0.677435	0.749067	0.633598	0.713718	0.798153	0.847877	0.674189
TCGA-MZ-A7D7-01A-21R-A34R-07	0.52706	0.718229	0.614864	0.47451	0.622133	0.606533	0.577522	0.672798	0.561373	0.786674	0.686889	0.655884	0.734931	0.541544	0.969132	0.648322	0.37019	0.848915	0.572131	0.556722	0.555588	0.667852	0.54594	0.592522	0.510431	0.59912	0.778454	0.815221	0.643151
TCGA-F7-8298-01A-11R-2403-07	0.598338	0.802858	0.641036	0.531489	0.655976	0.679948	0.629076	0.868252	0.756509	0.857056	0.638809	0.720723	0.786933	0.54446	0.992348	0.677958	0.563663	0.83567	0.602817	0.639499	0.660976	0.810742	0.599966	0.676963	0.516086	0.668285	0.798787	0.73561	0.734507
TCGA-CR-7395-01A-11R-2016-07	0.823452	0.889388	0.720456	0.690305	0.716145	0.884233	0.745539	0.945739	0.876941	0.940163	0.693707	0.849271	0.845763	0.714404	0.996936	0.752943	0.622773	0.887579	0.762475	0.759521	0.776708	0.939452	0.757983	0.728875	0.726475	0.799771	0.83961	0.831322	0.774706
TCGA-CR-7398-01A-11R-2016-07	0.735398	0.672869	0.59499	0.534242	0.618381	0.625135	0.611167	0.763694	0.758977	0.807922	0.515381	0.676204	0.766154	0.789335	0.988807	0.676298	0.453584	0.836164	0.58247	0.603165	0.639912	0.89859	0.590239	0.583591	0.615182	0.680894	0.803345	0.85696	0.728553
TCGA-CV-7261-01A-11R-2016-07	0.544437	0.761425	0.647411	0.615288	0.627517	0.682667	0.628441	0.713056	0.746949	0.853063	0.58593	0.695072	0.800972	0.670413	0.992968	0.716911	0.442535	0.846994	0.618672	0.600249	0.626103	0.824515	0.574716	0.604727	0.499164	0.674885	0.79247	0.755791	0.737707
TCGA-DQ-7591-01A-11R-2081-07	0.844515	0.742849	0.720208	0.664806	0.621326	0.895465	0.687329	0.91629	0.769951	0.915336	0.855366	0.838963	0.747805	0.290353	0.990985	0.719424	0.339219	0.828828	0.691417	0.700221	0.74705	0.926264	0.683179	0.685402	0.593183	0.767676	0.817152	0.798879	0.711953
TCGA-P3-A5Q5-01A-11R-A28V-07	0.752378	0.822822	0.719782	0.716482	0.655619	0.948346	0.733303	0.960381	0.846229	0.941862	0.74196	0.866591	0.862041	0.607135	0.988686	0.738134	0.605642	0.857514	0.74211	0.786544	0.798048	0.965576	0.796473	0.739067	0.660114	0.831945	0.80726	0.769608	0.686485
TCGA-CV-7236-01A-11R-2016-07	0.551115	0.766212	0.663268	0.578879	0.662631	0.702793	0.643777	0.770886	0.754822	0.885296	0.757386	0.739042	0.795729	0.516899	0.994126	0.704474	0.512229	0.893044	0.638458	0.629672	0.655482	0.848555	0.591993	0.647271	0.451881	0.692346	0.800733	0.79566	0.785431
TCGA-CQ-5331-01A-02R-1873-07	0.827752	0.868349	0.698301	0.640924	0.70326	0.870637	0.72326	0.94379	0.754197	0.941392	0.544589	0.844182	0.800517	0.617496	0.999221	0.759497	0.597284	0.895833	0.812777	0.753399	0.755603	0.94268	0.723616	0.76423	0.635084	0.787107	0.831683	0.880763	0.773993
TCGA-CV-6945-01A-11R-1915-07	0.514519	0.668313	0.627617	0.419637	0.604953	0.630903	0.576187	0.633152	0.657132	0.843413	0.54884	0.635486	0.817992	0.378462	0.988238	0.660884	0.106094	0.835892	0.521098	0.546064	0.568543	0.732474	0.517622	0.577428	0.417526	0.596722	0.759422	0.760445	0.607225
TCGA-CV-A6JE-01A-11R-A31N-07	0.536023	0.817427	0.627013	0.499667	0.635245	0.872391	0.658871	0.943151	0.7641	0.90391	0.731635	0.801239	0.794773	0.527449	0.994608	0.657583	0.620168	0.857877	0.666024	0.701962	0.696554	0.857881	0.698251	0.704543	0.644706	0.705066	0.776163	0.839112	0.520521
TCGA-CN-4742-01A-02R-1514-07	0.527775	0.763056	0.68752	0.635638	0.666437	0.684928	0.653054	0.779126	0.788423	0.881267	0.677114	0.727419	0.82304	0.658989	0.992331	0.721875	0.446891	0.861851	0.692754	0.667599	0.674335	0.881946	0.657035	0.639447	0.524144	0.71806	0.815182	0.826453	0.742105
TCGA-CV-6441-01A-11R-1686-07	0.4935	0.616159	0.647443	0.470924	0.567555	0.62544	0.602455	0.753869	0.644815	0.842031	0.654007	0.633769	0.678692	0.522413	0.990505	0.575425	0.190092	0.856099	0.569364	0.512783	0.555283	0.728687	0.504023	0.444884	0.345328	0.591114	0.738551	0.850107	0.74351
TCGA-HD-8634-01A-11R-2403-07	0.540915	0.818143	0.665918	0.558967	0.651805	0.698549	0.640594	0.744268	0.685013	0.844696	0.642414	0.732136	0.772752	0.595816	0.996742	0.696536	0.18497	0.870042	0.720176	0.635199	0.658801	0.786448	0.596123	0.64604	0.434833	0.686757	0.797994	0.865436	0.732152
TCGA-CV-A6JO-01B-11R-A34R-07	0.775284	0.876203	0.707033	0.580474	0.671354	0.875288	0.709076	0.927531	0.700513	0.919363	0.654778	0.839376	0.81278	0.436911	0.998679	0.715024	0.490705	0.895637	0.732077	0.734272	0.717405	0.873941	0.700595	0.717213	0.602839	0.741789	0.811561	0.86631	0.722326
TCGA-CR-7394-01A-11R-2016-07	0.815057	0.86099	0.693114	0.704073	0.699468	0.958943	0.727468	0.960525	0.814329	0.922913	0.737121	0.855443	0.84322	0.733992	0.996844	0.781962	0.620345	0.889821	0.770687	0.766949	0.762363	0.95104	0.760844	0.738151	0.610505	0.828454	0.843858	0.859228	0.754067
TCGA-HD-A633-01A-11R-A28V-07	0.523242	0.692056	0.631085	0.494961	0.617973	0.558048	0.585007	0.798689	0.577712	0.830082	0.592192	0.646463	0.799062	0.482063	0.989112	0.664305	0.440479	0.822108	0.540458	0.579223	0.570372	0.805837	0.541251	0.524921	0.558283	0.634813	0.774971	0.709802	0.710885
TCGA-CV-5431-01A-01R-1514-07	0.733063	0.832712	0.740132	0.684384	0.689797	0.885452	0.734025	0.914866	0.760886	0.924046	0.802757	0.84109	0.815603	0.615291	0.994309	0.708047	0.597959	0.857814	0.665235	0.74451	0.768227	0.948397	0.723992	0.757573	0.682731	0.794216	0.837597	0.764798	0.745086
TCGA-CV-5436-01A-01R-1514-07	0.718154	0.733414	0.696161	0.569046	0.652525	0.728332	0.65356	0.816304	0.750699	0.863748	0.683653	0.757482	0.766172	0.687907	0.996136	0.645154	0.434698	0.862463	0.58373	0.62672	0.646538	0.797706	0.588277	0.649276	0.494815	0.674076	0.798791	0.859231	0.659406
TCGA-CN-A6V7-01A-12R-A34R-07	0.563475	0.760075	0.691366	0.554736	0.611393	0.787617	0.655084	0.806232	0.636949	0.820474	0.581095	0.767174	0.734215	0.267761	0.975594	0.649183	0.439481	0.833722	0.598159	0.63355	0.648825	0.817628	0.633832	0.612488	0.587933	0.670616	0.775021	0.808163	0.602779
TCGA-CV-7438-01A-21R-2132-07	0.737497	0.810977	0.664148	0.5607	0.664005	0.669249	0.650833	0.778737	0.751683	0.908447	0.801141	0.760072	0.808721	0.424888	0.997554	0.70113	0.471485	0.88357	0.650344	0.665189	0.698029	0.88995	0.617044	0.695034	0.586206	0.720724	0.817155	0.849172	0.760166
TCGA-CN-4727-01A-01R-1436-07	0.691496	0.693393	0.63631	0.484002	0.621666	0.508291	0.575868	0.690124	0.619295	0.785437	0.382732	0.534779	0.717457	0.515656	0.991663	0.719553	0.462449	0.788601	0.556963	0.529398	0.58738	0.741724	0.429926	0.56523	0.46675	0.618497	0.781543	0.697564	0.737466
TCGA-CQ-5326-01A-01R-1873-07	0.793519	0.805393	0.691231	0.520192	0.668537	0.695398	0.651717	0.769543	0.806927	0.880043	0.256244	0.71098	0.824944	0.635104	0.996396	0.758839	0.496534	0.870596	0.630061	0.650554	0.652645	0.898031	0.590717	0.658286	0.541213	0.685956	0.807114	0.820875	0.621252
TCGA-CN-4731-01A-01R-1436-07	0.532034	0.713503	0.645716	0.527037	0.629039	0.648056	0.63969	0.857104	0.697006	0.933261	0.711509	0.71635	0.795152	0.518745	0.993209	0.651804	0.475217	0.848098	0.596206	0.559907	0.609769	0.802102	0.645591	0.615346	0.567922	0.649298	0.788298	0.788143	0.677624
TCGA-CV-5434-01A-01R-1686-07	0.76237	0.864194	0.713547	0.565799	0.641465	0.684623	0.682024	0.776262	0.810347	0.900012	0.571701	0.722736	0.837359	0.572025	0.99223	0.715224	0.381983	0.883723	0.675111	0.675325	0.702236	0.94921	0.615564	0.619838	0.494028	0.731839	0.81811	0.840572	0.788969
TCGA-CN-6989-01A-11R-1915-07	0.78566	0.8291	0.720772	0.57781	0.672737	0.63103	0.698546	0.734299	0.883719	0.902262	0.771268	0.67501	0.861731	0.666154	0.990276	0.710269	0.470481	0.862297	0.651919	0.68212	0.728272	0.962806	0.559334	0.638999	0.590879	0.738989	0.840488	0.805939	0.772836
TCGA-F7-A622-01A-11R-A28V-07	0.716845	0.71656	0.62065	0.399313	0.626737	0.586229	0.581362	0.709702	0.58389	0.82798	0.462363	0.691752	0.763481	0.550656	0.991484	0.645444	0.320488	0.869226	0.5685	0.518626	0.589081	0.737963	0.527693	0.645885	0.449961	0.600688	0.771091	0.85806	0.712618
TCGA-CN-6016-01A-11R-1686-07	0.544681	0.791067	0.690243	0.576282	0.636332	0.717303	0.679163	0.921016	0.712078	0.909616	0.742482	0.748579	0.85319	0.730799	0.991039	0.740718	0.568248	0.878542	0.664549	0.679747	0.714502	0.937775	0.628255	0.630701	0.551155	0.73803	0.810712	0.844375	0.752214
TCGA-CV-6953-01A-11R-1915-07	0.706586	0.740871	0.632774	0.6301	0.648255	0.777707	0.620752	0.809627	0.747631	0.870414	0.625086	0.760936	0.791289	0.47825	0.960326	0.691534	0.525679	0.822772	0.62975	0.629951	0.694618	0.869799	0.648724	0.665688	0.588171	0.72861	0.801066	0.750546	0.739903
TCGA-KU-A6H7-06A-21R-A31N-07	0.821477	0.855886	0.680251	0.645798	0.624752	0.858923	0.695271	0.925904	0.732802	0.924333	0.842566	0.844112	0.76199	0.466939	0.99141	0.63112	0.502981	0.809818	0.700692	0.702865	0.723949	0.882174	0.698955	0.653141	0.514579	0.7444	0.792959	0.699879	0.675735
TCGA-IQ-A61I-01A-11R-A30B-07	0.721111	0.792384	0.737367	0.648966	0.655514	0.778571	0.69874	0.90024	0.668184	0.918194	0.687274	0.824048	0.740213	0.357199	0.991675	0.698192	0.667613	0.860095	0.710106	0.681154	0.709704	0.845454	0.664932	0.651991	0.584594	0.731033	0.803481	0.884361	0.64986
TCGA-CR-6477-01A-11R-1873-07	0.798791	0.808923	0.687077	0.626054	0.681469	0.702285	0.679664	0.74527	0.875058	0.896518	0.803291	0.727859	0.867233	0.702907	0.989923	0.745936	0.420199	0.8646	0.731513	0.691792	0.736179	0.945221	0.662325	0.686323	0.622848	0.750865	0.817883	0.816778	0.75873
TCGA-CV-A45W-01A-11R-A24Z-07	0.721052	0.874671	0.692168	0.702754	0.646843	0.855085	0.702105	0.872867	0.73271	0.897244	0.493253	0.81976	0.815859	0.696639	0.993724	0.712068	0.460142	0.857814	0.701535	0.694596	0.715835	0.920597	0.724887	0.657928	0.558365	0.778043	0.810252	0.799179	0.765867
TCGA-CV-7095-01A-21R-2016-07	0.750438	0.73971	0.688958	0.592174	0.653155	0.69273	0.626516	0.747257	0.750971	0.89616	0.763013	0.731991	0.821232	0.27831	0.990088	0.687078	0.55727	0.884058	0.633065	0.637928	0.64727	0.837602	0.584732	0.681007	0.576852	0.678665	0.797731	0.861617	0.700315
TCGA-CR-7372-01A-11R-2016-07	0.730297	0.70117	0.642114	0.581956	0.649609	0.685843	0.633925	0.723209	0.7525	0.860083	0.675571	0.697705	0.815494	0.805772	0.986418	0.715353	0.470038	0.840239	0.683884	0.612131	0.668893	0.860828	0.649796	0.64693	0.60314	0.692391	0.806858	0.796591	0.788274
TCGA-C9-A47Z-01A-11R-A24H-07	0.714424	0.870412	0.658248	0.505496	0.646453	0.70386	0.622966	0.790335	0.70585	0.863354	0.51312	0.731442	0.797312	0.57207	0.995813	0.696515	0.279903	0.853428	0.644492	0.654147	0.637326	0.75415	0.598685	0.624301	0.556979	0.655147	0.798097	0.831778	0.691378
TCGA-QK-A6IJ-01A-11R-A31N-07	0.802964	0.754137	0.61569	0.577798	0.659766	0.624194	0.658319	0.807718	0.782609	0.933482	0.684539	0.76874	0.807141	0.575734	0.994563	0.680044	0.550814	0.855679	0.689438	0.666999	0.704888	0.857703	0.58695	0.701743	0.634108	0.70246	0.796962	0.821496	0.610148
TCGA-CV-A463-01A-11R-A266-07	0.706557	0.716995	0.604753	0.570169	0.613193	0.76988	0.606002	0.798807	0.641796	0.893747	0.643808	0.752071	0.713378	0.579063	0.99604	0.707093	0.51649	0.826863	0.583205	0.602798	0.591706	0.739487	0.594579	0.607282	0.407964	0.66907	0.781292	0.806547	0.707412
TCGA-CN-5367-01A-01R-1436-07	0.563622	0.736457	0.658793	0.558911	0.625828	0.641525	0.638133	0.686505	0.738077	0.905779	0.89441	0.699337	0.816619	0.523173	0.995855	0.677803	0.329258	0.897237	0.637149	0.62103	0.629114	0.890662	0.581425	0.615849	0.545764	0.676659	0.792284	0.889175	0.730503
TCGA-UF-A7JO-01A-11R-A34R-07	0.806025	0.87851	0.685845	0.579288	0.669635	0.882733	0.727706	0.942978	0.877537	0.937577	0.763817	0.842423	0.843344	0.462581	0.999026	0.739623	0.561912	0.886042	0.762718	0.766316	0.744658	0.95719	0.691657	0.771578	0.675689	0.781812	0.825331	0.889955	0.678422
TCGA-CV-A45V-01A-21R-A24Z-07	0.73838	0.77998	0.691496	0.583495	0.662193	0.764213	0.670396	0.892197	0.718385	0.875981	0.606277	0.786397	0.787374	0.741738	0.996514	0.723733	0.600974	0.876519	0.671317	0.672792	0.700717	0.86464	0.6604	0.665713	0.59732	0.721323	0.808284	0.838082	0.764695
TCGA-BA-A8YP-01A-11R-A39I-07	0.541024	0.717411	0.625943	0.540822	0.614881	0.554185	0.614777	0.621578	0.713933	0.848249	0.427449	0.622256	0.813132	0.495866	0.977046	0.672326	0.388141	0.817415	0.559321	0.586262	0.620073	0.839	0.541403	0.539883	0.488126	0.657172	0.794015	0.759973	0.680382
TCGA-CN-6988-01A-11R-1915-07	0.659563	0.671396	0.580797	0.431128	0.581347	0.588821	0.542916	0.628432	0.642248	0.817402	0.434718	0.60063	0.747498	0.446903	0.975853	0.595329	0.0772348	0.805899	0.503446	0.462761	0.513554	0.664701	0.49158	0.42113	0.50922	0.551067	0.753927	0.742505	0.649212
TCGA-CV-A45Z-01A-21R-A24Z-07	0.581075	0.813798	0.707444	0.586339	0.643255	0.749195	0.699808	0.883076	0.759455	0.919607	0.649163	0.790524	0.801836	0.403721	0.995839	0.674085	0.550168	0.865659	0.633503	0.685289	0.715992	0.863319	0.650655	0.64211	0.635023	0.716511	0.823652	0.806974	0.715239
TCGA-UF-A7JH-01A-21R-A34R-07	0.742339	0.741014	0.718301	0.561391	0.654678	0.76035	0.67615	0.794859	0.687195	0.887916	0.681131	0.782552	0.799692	0.534573	0.994665	0.698141	0.476891	0.84835	0.66098	0.653129	0.706547	0.904842	0.656114	0.684169	0.585493	0.703787	0.791454	0.813696	0.717445
TCGA-CV-7413-01A-11R-2081-07	0.567535	0.760822	0.663144	0.537774	0.648221	0.688461	0.678767	0.837746	0.752258	0.895849	0.76189	0.714095	0.807099	0.54296	0.99693	0.706098	0.543474	0.881923	0.66367	0.668019	0.682725	0.903444	0.653553	0.634541	0.63595	0.706268	0.810491	0.825896	0.683884
TCGA-CR-7376-01A-11R-2132-07	0.798222	0.901428	0.741512	0.693011	0.713313	0.918208	0.760788	0.962595	0.861781	0.929482	0.716182	0.855552	0.85624	0.819241	0.997386	0.794531	0.62271	0.904383	0.77778	0.782749	0.774535	0.980314	0.78238	0.729855	0.6592	0.828569	0.843091	0.837488	0.815851
TCGA-CN-6011-01A-11R-1686-07	0.549135	0.859123	0.683105	0.475512	0.634746	0.755827	0.660942	0.871953	0.603166	0.853676	0.0346046	0.753913	0.795522	0.598207	0.998637	0.72792	0.523628	0.869501	0.654421	0.660097	0.648121	0.824566	0.604012	0.630428	0.42772	0.683144	0.788497	0.876625	0.709794
TCGA-BB-4224-01A-01R-1436-07	0.683725	0.65378	0.578701	0.364097	0.539744	0.605949	0.532431	0.621797	0.402037	0.840064	0.804305	0.627262	0.77737	0.412988	0.992316	0.662602	0.237743	0.804126	0.610107	0.514174	0.488108	0.782255	0.42445	0.520301	0.512595	0.556497	0.747077	0.791283	0.588414
TCGA-CV-A464-01A-11R-A266-07	0.572943	0.759638	0.687714	0.610282	0.650157	0.717557	0.67683	0.826062	0.740512	0.881801	0.788968	0.783325	0.784812	0.714416	0.997361	0.680136	0.575194	0.891837	0.718981	0.636806	0.688497	0.856407	0.667954	0.656125	0.596421	0.71357	0.799884	0.871114	0.744889
TCGA-CR-7370-01A-11R-2132-07	0.590337	0.857055	0.634558	0.566122	0.629289	0.75786	0.645235	0.813767	0.692399	0.826126	0.481556	0.744014	0.750705	0.617084	0.988032	0.681918	0.426921	0.849072	0.579117	0.649195	0.648032	0.80848	0.602972	0.615437	0.581282	0.680893	0.804274	0.782249	0.762397
TCGA-CQ-5330-01A-01R-1686-07	0.707922	0.886765	0.707735	0.601805	0.658581	0.821923	0.70993	0.932057	0.772065	0.912113	0.65845	0.823639	0.816155	0.611481	0.998535	0.706655	0.592316	0.887286	0.783882	0.742174	0.720072	0.956402	0.702888	0.74468	0.646415	0.770827	0.829553	0.848907	0.753579
TCGA-QK-A8ZB-01A-11R-A39I-07	0.700253	0.677782	0.671746	0.621842	0.637534	0.627574	0.63659	0.688704	0.681625	0.873492	0.677733	0.6846	0.784821	0.573102	0.98815	0.677044	0.408257	0.864598	0.559144	0.594189	0.649418	0.787897	0.569756	0.616334	0.506947	0.681337	0.805541	0.788889	0.736553
TCGA-CV-7235-01A-11R-2016-07	0.773581	0.798012	0.717483	0.58032	0.664039	0.841134	0.708654	0.936063	0.655963	0.905869	0.755136	0.821912	0.790198	0.673013	0.999027	0.707871	0.604339	0.886711	0.717131	0.715751	0.722763	0.933938	0.693828	0.713871	0.63598	0.743995	0.810763	0.861131	0.812046
TCGA-CR-7368-01A-11R-2132-07	0.769062	0.751535	0.666869	0.631459	0.661177	0.763197	0.677691	0.88314	0.759464	0.886877	0.694116	0.770656	0.816363	0.7277	0.996929	0.731391	0.607701	0.872132	0.664625	0.677478	0.715754	0.895261	0.651635	0.657975	0.629699	0.737848	0.807744	0.815256	0.766289
TCGA-CN-6012-01A-11R-1686-07	0.727061	0.791005	0.690583	0.628872	0.664073	0.781747	0.694556	0.842814	0.762696	0.906006	0.629634	0.785938	0.807952	0.574315	0.99256	0.735995	0.499966	0.875149	0.700555	0.666769	0.716097	0.912338	0.693886	0.651993	0.596118	0.748863	0.806438	0.831402	0.81118
TCGA-CR-7401-01A-11R-2016-07	0.766479	0.751466	0.668461	0.560135	0.66963	0.694178	0.652612	0.748546	0.780956	0.89785	0.805478	0.716769	0.798419	0.800011	0.994133	0.724285	0.456633	0.86834	0.721279	0.636512	0.683811	0.875821	0.604946	0.658154	0.557226	0.714085	0.81476	0.819519	0.801587
TCGA-CN-5363-01A-01R-1436-07	0.537326	0.876585	0.674614	0.622093	0.654141	0.826446	0.686393	0.933602	0.707041	0.923606	0.599799	0.817254	0.791996	0.461931	0.999238	0.720571	0.681498	0.878151	0.654433	0.714375	0.682015	0.878617	0.683448	0.717958	0.643571	0.740287	0.810209	0.819022	0.767523
TCGA-QK-A652-01A-11R-A30B-07	0.737097	0.802086	0.681467	0.641044	0.667877	0.753413	0.677994	0.820101	0.815531	0.909644	0.795509	0.783152	0.800731	0.618395	0.99654	0.729672	0.53766	0.896187	0.729932	0.670135	0.716365	0.876965	0.67992	0.668235	0.589522	0.745923	0.804754	0.875123	0.743375
TCGA-CN-6017-01A-11R-1686-07	0.753745	0.905298	0.713216	0.722841	0.706044	0.949083	0.754828	0.967201	0.858452	0.945804	0.779532	0.87696	0.812474	0.739241	0.998206	0.782062	0.629218	0.899486	0.815797	0.789598	0.771509	0.966872	0.782467	0.761898	0.641309	0.836529	0.836606	0.870069	0.820661
TCGA-CV-A45O-01A-21R-A24H-07	0.510574	0.855518	0.625622	0.550288	0.642362	0.783704	0.649514	0.80243	0.666111	0.89226	0.663917	0.751168	0.78135	0.520329	0.994815	0.730756	0.524201	0.864144	0.663317	0.697152	0.6234	0.839406	0.658595	0.626824	0.554099	0.70306	0.808421	0.886915	0.689353
TCGA-D6-6516-01A-11R-1873-07	0.739833	0.841585	0.668065	0.581654	0.668064	0.8498	0.684797	0.925936	0.780424	0.895959	0.709494	0.807397	0.816483	0.736483	0.997756	0.708733	0.629112	0.861548	0.72514	0.70927	0.697207	0.849241	0.671231	0.690097	0.613096	0.731749	0.817338	0.855396	0.763359
TCGA-CN-6022-01A-21R-1686-07	0.702991	0.757455	0.696421	0.562825	0.653696	0.62051	0.674952	0.736954	0.686934	0.895076	0.76697	0.67732	0.858375	0.667863	0.991421	0.715272	0.317684	0.859315	0.620324	0.658877	0.702149	0.94672	0.560332	0.609223	0.52354	0.717132	0.814639	0.73363	0.772393
TCGA-KU-A6H8-01A-21R-A34R-07	0.636509	0.696614	0.671125	0.572735	0.629709	0.855695	0.627806	0.861851	0.777222	0.866927	0.742714	0.765831	0.735107	0.731417	0.987828	0.635759	0.562584	0.832673	0.6707	0.637207	0.651713	0.794428	0.602566	0.586578	0.555482	0.719416	0.768364	0.754186	0.729099
TCGA-CV-6959-01A-11R-1915-07	0.707138	0.823051	0.667378	0.632294	0.676298	0.745129	0.665236	0.83126	0.777354	0.903495	0.619772	0.78205	0.793157	0.700336	0.998046	0.735927	0.547774	0.877316	0.710007	0.672965	0.684176	0.892187	0.631115	0.695198	0.58028	0.729015	0.819252	0.839811	0.79366
TCGA-QK-A8Z7-01A-11R-A39I-07	0.457608	0.623236	0.597731	0.580139	0.565674	0.602645	0.587426	0.679606	0.565277	0.820204	0.53415	0.646901	0.727888	0.519954	0.989418	0.622867	0.185741	0.784403	0.508348	0.551597	0.603805	0.782764	0.531181	0.448213	0.482925	0.639688	0.769698	0.714068	0.608435
TCGA-CV-6943-01A-11R-1915-07	0.742141	0.898143	0.722817	0.69626	0.701647	0.963568	0.750514	0.960045	0.760697	0.955722	0.708658	0.864297	0.817223	0.76577	0.998476	0.785663	0.652086	0.905008	0.785231	0.778463	0.773539	0.965042	0.783459	0.74633	0.660677	0.829844	0.840639	0.878054	0.802112
TCGA-F7-A623-01A-11R-A28V-07	0.547377	0.667963	0.612638	0.593969	0.634023	0.730797	0.622474	0.774683	0.634534	0.844525	0.588725	0.760332	0.741926	0.502456	0.991425	0.674673	0.535527	0.863948	0.672228	0.623829	0.674744	0.809497	0.64252	0.615574	0.53377	0.689305	0.784314	0.867016	0.73037
TCGA-CR-6482-01A-11R-1873-07	0.770802	0.804276	0.690134	0.786833	0.676911	0.857982	0.729465	0.881991	0.789892	0.959744	0.816288	0.823027	0.784215	0.671195	0.99813	0.773142	0.596238	0.880855	0.760773	0.736548	0.772473	0.9779	0.813162	0.716415	0.674066	0.837549	0.838089	0.8133	0.823114
TCGA-BA-5559-01A-01R-1514-07	0.707756	0.862331	0.723672	0.656755	0.662392	0.959604	0.742047	0.957952	0.780766	0.939161	0.718397	0.868869	0.799036	0.722445	0.99868	0.725686	0.610315	0.874993	0.735636	0.783092	0.792223	0.971369	0.770441	0.747075	0.655178	0.824294	0.841156	0.817844	0.768547
TCGA-UP-A6WW-01A-12R-A34R-07	0.672956	0.767025	0.664541	0.617088	0.643631	0.709324	0.671701	0.777976	0.711802	0.916714	0.859251	0.772961	0.798311	0.568296	0.991648	0.710805	0.369312	0.843025	0.649144	0.648353	0.707964	0.917446	0.634252	0.643136	0.53699	0.713074	0.801274	0.786138	0.643161
TCGA-T3-A92M-01A-31R-A39I-07	0.755683	0.753732	0.673265	0.621167	0.641992	0.817476	0.670734	0.858968	0.704023	0.923565	0.725821	0.795379	0.80456	0.542567	0.996666	0.706983	0.523366	0.858707	0.633028	0.668896	0.725367	0.91648	0.643701	0.705633	0.611509	0.744292	0.804598	0.813127	0.736599
TCGA-CV-A6JD-01A-11R-A31N-07	0.586774	0.894323	0.699256	0.573027	0.667537	0.850156	0.705587	0.899935	0.802732	0.948508	0.902263	0.807462	0.815954	0.432086	0.998274	0.708244	0.499035	0.865216	0.682855	0.712698	0.677233	0.941257	0.703419	0.722261	0.633771	0.735565	0.813377	0.892099	0.576404
TCGA-CN-A6UY-01A-12R-A34R-07	0.795173	0.819336	0.727268	0.616998	0.669491	0.900649	0.728364	0.963839	0.701906	0.944655	0.851084	0.836522	0.764618	0.318223	0.99589	0.675163	0.582837	0.813444	0.638456	0.718659	0.763891	0.898209	0.739857	0.682612	0.688538	0.758496	0.808836	0.840925	0.666357
TCGA-BA-4075-01A-01R-1436-07	0.541139	0.818608	0.712529	0.533189	0.648792	0.540895	0.617443	0.710283	0.7341	0.875031	0.715726	0.607925	0.830265	0.494995	0.987316	0.720703	0.553946	0.844549	0.571702	0.621724	0.58235	0.775165	0.543464	0.56915	0.498782	0.649073	0.783593	0.754098	0.703886
TCGA-CN-6996-01A-11R-1915-07	0.843525	0.898698	0.722215	0.672053	0.703588	0.796943	0.719805	0.931898	0.880095	0.920671	0.703489	0.839808	0.813614	0.777287	0.999069	0.75853	0.559577	0.888319	0.756744	0.757757	0.764586	0.950811	0.71077	0.756719	0.661442	0.794021	0.847095	0.903894	0.772183
TCGA-IQ-A61E-01A-22R-A30B-07	0.572873	0.826012	0.657992	0.575937	0.653918	0.789396	0.664281	0.923416	0.697996	0.89062	0.601235	0.79292	0.787788	0.600002	0.998299	0.695433	0.601219	0.878311	0.644925	0.700413	0.679404	0.779917	0.626192	0.722868	0.592261	0.712172	0.820818	0.87648	0.629082
TCGA-BB-4225-01A-01R-1436-07	0.774807	0.782781	0.74958	0.686576	0.66622	0.908653	0.728957	0.930626	0.697342	0.916743	0.824667	0.84171	0.772795	0.526156	0.993632	0.701115	0.606945	0.854201	0.719084	0.720902	0.772437	0.932032	0.739521	0.69654	0.615421	0.779935	0.840345	0.882344	0.713604

## Sheet: Supplementary Table 5
Supplementary Table 5. Construction of the immune cell function (ICF) gene signature in HNSCC.
Immune related genes in IMMPORT	Differentially expressed genes (DEGs) between Immunity-H and Immunity-L	Immune related differentially expressed genes (IRDEGs)	Prognosis-related immune genes (PIGs)	ICF gene signature
AZGP1	ATP2C2	CD3G	CD3E	CD19
B2M	UBE2L6	TNFSF4	ICOS	ZAP70
CALR	ALOX5	COLEC12	IL16	TNFRSF4
CANX	KRT42P	SAA1	CD19	CCL22
CD1A	ADRA2C	IGKV1D-43	ZAP70	RBP5
CD1B	TMEM176B	CCR5	PRKCB	STC2
CD1C	LMO2	ICAM1	SH2D1A	ROBO1
CD1D	CD3G	MICB	CD79B	CTSG
CD1E	IGLL5	CXCL9	TNFRSF4
CD4	IRX2	AQP9	CCL22
CD8A	C5orf38	A2M	CXCR6
CD8B	AC087783.1	IGHV3-66	LCK
CD74	IRF4	S1PR1	IL2RG
CREB1	HAVCR2	IGHV3-43	CD79A
CTSB	TNFSF4	IGHV3-15	TNFRSF13C
CTSE	COLEC12	PDIA2	CXCR3
CTSL	SAA1	IGLC2	CCR4
CTSS	MAL	IGLV3-9	INPP5D
FCER1G	CES1	CSF1R	CSF2RB
FCGRT	BCL2	VAV1	CD3D
PDIA3	IGKV1D-43	HCST	RBP5
HFE	P2RY10	TRBV6-5	CCR7
HLA-A	SERPINB9P1	RSAD2	TNFRSF17
HLA-B	GCAT	IGKV3-11	ITGAL
HLA-C	CCR5	CD3E	CD247
HLA-DMA	PSTPIP1	IL32	STC2
HLA-DMB	LINC02541	IGHD3-3	ROBO1
HLA-DOA	FITM1	IGHJ2	LTB
HLA-DOB	ICAM1	TRBC2	CTSG
HLA-DPA1	PDE4B	HLA-DRB5	CTLA4
HLA-DPB1	GNGT2	CCL2
HLA-DQA1	RNASE1	CCR1
HLA-DQA2	MICB	ICOS
HLA-DQB1	CXCL9	IGHV3-7
HLA-DRA	AQP9	IL16
HLA-DRB1	NEXN	LGR6
HLA-DRB3	B4GALNT1	CXCL12
HLA-DRB4	A2M	FPR1
HLA-DRB5	IGHV3-66	IGHV3-11
HLA-E	S1PR1	IGLV7-46
HLA-F	LILRB4	IFIH1
HLA-G	SYTL3	HLA-DRA
HLA-H	ME1	TRBV29-1
MR1	C1S	IGHV4-31
HSPA1A	LAMP3	CD19
HSPA1B	TNFAIP6	PTGDS
HSPA1L	AGAP2	CX3CL1
HSPA2	IGHV3-43	ELN
HSPA4	RFTN1	ZAP70
HSPA5	AC134879.2	GAL
HSPA6	HLA-DQB2	IGHV4-61
HSPA8	DDIT4L	TRAV13-1
HSP90AA1	ADAM28	IGHJ3
HSP90AB1	PTGIS	TYMP
ICAM1	CLDN8	IGKV6D-21
IFNA1	CTSW	ARG2
IFNA2	IGHV3-15	IGHV7-81
IFNA4	HNMT	INHBB
IFNA5	KCNMB2-AS1	HCK
IFNA6	PDIA2	TNFSF12
IFNA7	LINC01564	CCL18
IFNA8	IGLC2	IGKC
IFNA10	FMO1	IGHV3-73
IFNA13	FOLR3	CCL11
IFNA14	LINC02031	HLA-A
IFNA16	BATF2	IL33
IFNA17	PIR	MARCO
IFNA21	SH2B3	PLA2G2A
IFNG	SLC15A3	PRKCB
KIR2DL1	LINC00392	IGHD
KIR2DL2	ARHGAP9	CD4
KIR2DL3	FAHD2B	C3AR1
KIR2DL4	IGHV3-19	SH2D1A
KIR2DS1	HCP5	CD79B
KIR2DS3	IGLV3-9	ERAP2
KIR2DS4	CSF1R	IGLV3-27
KIR2DS5	VAV1	CXCL11
KIR3DL1	ALOX5AP	CD40
KIR3DL2	GBP1P1	IGHV1-69
KLRC1	IGLV1-41	TNFRSF10D
KLRC2	PLA2R1	HLA-DMB
KLRC3	HCST	IGHG1
KLRD1	POU2AF1	IGKV1-17
LTA	SEPTIN1	C3
CIITA	S1PR4	CRLF1
MICA	TRBV6-5	DDX58
MICB	PSMB8-AS1	IGLV6-57
NFYA	RSAD2	CD74
NFYB	C7	IGLV2-8
NFYC	IGKV3-11	NTS
LGMN	FOLR1	BMP7
PSMB8	CD3E	CD8A
PSMC1	MYO7A	TYROBP
PSMC2	DDX60	CHIT1
PSMC3	IL32	SEMA3B
PSMC4	HERC6	IGLV8-61
PSMC5	TRANK1	TRBV28
PSMC6	IGHD3-3	TRBJ2-7
PSMD1	IGFL1P1	VIM
PSMD2	IGKV1OR2-6	IGHV3-49
PSMD3	AC135068.1	IGKV1-13
PSMD4	GFI1	PSME2
PSMD5	IGHJ2	BST2
PSMD7	CD274	TNFRSF4
PSMD8	WAS	IGLV9-49
PSMD10	TRBC2	CCL22
PSMD11	HLA-DRB5	PML
PSMD13	CCL2	IGHV3-33
PSME1	TMC8	IGKV2D-40
PSME2	IGHV3OR15-7	IGKV2D-28
RELB	HVCN1	IGKV1D-12
RFX5	CCR1	IL15RA
RFXAP	FOLR2	PDCD1
SLC10A2	SFRP1	HLA-DPB1
TAP1	ICOS	MX1
TAP2	MPEG1	CTSS
TAPBP	IGHV3-7	IGHV1-3
THBS1	IL16	HLA-F
SEM1	TPSAB1	EGFR
KLRC4	LAMA1	CXCR6
AP3B1	CD69	IGKV1D-39
RFXANK	LGR6	LCK
PSMD6	CXCR2P1	S100B
PSME3	WARS1	IGLV2-11
PSMD14	CTSO	C5AR1
CLEC4M	CXCL12	OSGIN1
IFI30	HCLS1	PTPRC
PROCR	EPCAM	IGHD3-9
ADRM1	MEF2C	GNLY
ECPAS	SFRP4	LCP2
TRPC4AP	IGF2BP1	IRF7
CD209	ARHGAP31	IGKV1-9
UBXN1	FPR3	NFATC2
ERAP1	FPR1	CSF3R
TAPBPL	IGHV1OR15-2	CCL8
KIR2DL5A	IGHV3-11	CD86
ERAP2	PCAT6	IL2RG
ULBP3	IGLV7-46	CD72
ULBP2	HLA-DRB6	IGHV3-13
ULBP1	PLA2G2D	HLA-DQA1
KIR3DL3	IFIH1	TNFSF10
RAET1E	HLA-DRA	ISG15
RAET1L	TRBV29-1	ACKR1
UBR1	SASH3	CD79A
RAET1G	IGHV4-31	CD209
PDIA2	CD19	RAC3
HAMP	MFAP4	IGLV10-54
PI3	PTGDS	IGHV2-70
CAMP	PI16	OAS1
DEFB4A	CX3CL1	ICAM2
PPBP	ELN	IL36B
REG3G	ZAP70	IFITM1
CXCL14	APOL6	PSMB8
CXCL16	PCED1B-AS1	IGHV3-38
SLPI	GAL	TNFRSF13C
CXCL8	IGHV4-61	IGLV3-1
CXCL10	AOAH	IGHV3-20
CXCL9	MFAP5	FAS
CXCL5	SLAMF9	TNFSF13B
CXCL11	GIMAP1	IGHV3-21
CXCL6	TRAV13-1	IGHV1-58
CXCL1	RHEX	APLNR
CXCL12	VAMP5	NOS2
CXCL13	IGHJ3	SLC40A1
CXCL2	SPANXB1	CXCR3
PF4	ACAP1	TRIM22
XCL1	AL118516.1	IGLJ2
CXCL3	TYMP	NMB
DEFB103B	IGKV6D-21	TNFRSF9
CCL13	PSMB9	IL12RB2
CCL1	DNASE1L3	IGKV3D-20
DEFB1	ARG2	IGLV1-51
CCL8	IGHV7-81	OSM
ELANE	CYP1B1	HLA-B
DEFB103A	KHDC1L	IL21R
DEFA3	CALHM6	STAT1
DEFA1	SELP	CCR4
TMSB10	PRKAR2B	IGLC3
DEFA6	PECAM1	IGKV1-27
DEFA5	MS4A7	INPP5D
DEFA4	KLRG2	CSF2RB
LCN2	EXOC3L4	IGLV1-36
LCN1	IFIT5	IGKV4-1
COLEC10	SH3KBP1	IGKV1-39
BPI	INHBB	IL2RA
S100A9	U62317.1	CD3D
S100A8	AC087612.1	IGLV3-16
DCD	TSKS	TRBV7-9
LCN6	PILRA	IGHJ1
S100A12	PIM2	NR5A1
HTN3	PADI2	IDO1
LCN8	HCK	GMFG
DEFA1B	GPR34	IGHV3-23
CCR10	SKAP1	CCL3
CELA1	TNFSF12	IGLV2-23
DEFB106A	CLEC10A	ITGB2
PENK	CCL18	PLAAT4
BPIFC	IGKC	TAP2
MMP12	IGHV3-73	IGLV3-10
BPIFB6	MLLT11	IGKV2-30
LEAP2	PAQR8	TRAC
SFTPD	AC004687.1	IGHV1-2
LCN9	CCL11	TRBV20-1
BPIFB2	HLA-A	TNFRSF1B
PTGDS	IL33	NR4A3
TMSB4X	MARCO	IGKV2-28
PGLYRP1	PLA2G2A	FGF19
ZC3HAV1	PPM1K	IGLV5-45
TMSB15A	SLC7A7	TRDC
S100B	THBS4	B2M
S100A13	CYFIP2	ARTN
S100A6	MAGEA12	HLA-DPA1
DEFB119	PRKCB	HLA-DQB1
DEFB107A	IGHD	IGHV3-48
DEFB105A	UPK1A	RBP5
SERPIND1	AC011287.1	IGLV3-19
DEFB129	DOK3	HLA-DQA2
DEFB127	AL512326.5	IGKV1D-13
S100P	ATP2A3	IGHA2
S100A7	CD4	CD14
DEFB104A	TNFAIP8L2	IGLV1-47
DEFB126	FRZB	IGLV4-60
DEFB106B	C3AR1	CD48
DEFB104B	PTPN22	IGKV2D-24
DEFB107B	PARM1	TRBJ2-3
PGLYRP3	IGHV3OR16-17	APOBEC3A
PGLYRP2	RHOH	FASLG
S100A10	AC005336.1	CCR7
S100A2	IGF2BP3	IGKV1-5
DEFB125	SH2D1A	ISG20
DEFB123	CD79B	IGHG3
DEFB105B	CYP27A1	CXCL13
DEFB132	GDPD2	IGLV2-14
BPIFB3	ERAP2	IGKV1D-17
LCN12	MYOSLID	CD8B
PGLYRP4	IFIT2	IGKV1-12
S100A11	C2	TNFRSF17
S100A5	IGLV3-27	TNFRSF14
S100A3	CXCL11	TAPBPL
S100A1	CD40	IGLV3-21
DEFB128	NCF1	IGKV5-2
DEFB108B	IGHV1-69	CCL4
HTN1	AC008011.2	JAK2
LMBR1L	FZD7	PTHLH
S100A7A	RCOR2	CXCR4
DEFB118	ST8SIA4	PRF1
COLEC12	CHI3L1	PIK3R5
TMSB4Y	TNFRSF10D	CCL19
DEFB131A	BEX5	IGKV1-6
DEFB134	TOX	FGR
DEFB130A	MIR8071-2	IGHV4-34
DEFB124	IFI6	IL12RB1
DEFB121	HLA-DMB	SAA2
DEFB116	CD300E	HLA-H
DEFB115	ENPP4	ITGAL
DEFB114	PIGR	CD1C
DEFB113	PELATON	IGLV2-18
DEFB112	PPP1R16B	CCL4L2
DEFB110	IGHG1	MX2
TMSB15B	IGKV1-17	CCL3L3
DEFB133	REEP1	CIITA
S100Z	C3	IGLC6
MAVS	IKZF3	IGKJ5
TMSB4XP8	C19orf38	IGHV4-39
S100A14	MGAT3	LYZ
LCN10	CYTIP	MMP12
S100A16	CD300C	EBI3
DEFB136	IGFL2-AS1	IGHV3-64
DEFB135	CRLF1	GZMB
DEFB117	CCNA1	IGKV1D-16
ZC3HAV1L	DDX58	ANXA6
S100A7L2	IGLV6-57	IGLC7
MBL3P	PHYHD1	IGHV3-72
DEFB4B	SIGLEC1	TLR4
BPIFB4	CD74	CSF2RA
IFNAR1	IGLV2-8	IL18R1
AZU1	ITGAM	FCGR3A
DEFB131B	NTS	IGLV1-50
DEFA1A3	JSRP1	IGKV1-16
LCN1P1	BMP7	CCL21
S100G	CD8A	IGKV6-21
DEFA7P	TYROBP	ERAP1
DEFB130B	CHIT1	TRBJ2-1
DEFB108F	SYT8	IGLV5-37
DEFB131C	TBXAS1	CD247
TCHHL1	OAS3	VCAM1
TINAGL1	CCDC190	IGHV4-4
IFNGR1	IGHGP	STC2
SLC22A17	GSTM2	IGHV3-53
WFIKKN1	CD300A	IGHV5-51
WFDC2	SEMA3B	HLA-DMA
IL6	CLEC5A	RAC2
UMODL1	IGLV8-61	IGHV3-35
TGFB1	TRBV28	IGKV2-24
PF4V1	XAF1	NPR3
MMP9	AC244153.1	PTGS2
ANOS1	CLEC4A	TLR3
TLR4	JAK3	IGLV7-43
SPAG11B	IRF8	RASGRP1
A2M	LST1	IGLV1-44
NFKB1	TRBJ2-7	IGKV3-15
APOBEC3G	VASH1	GAST
FABP6	CALB1	CCL5
NOD2	IFIT3	IGHV1-24
MBL2	LAMC2	HLA-DOA
SFTPA1	GLRX	BTK
RBP1	VIM	IGHV2-5
TLR2	IGHV3-49	IGKV3D-11
SLC40A1	USH1G	TLR1
PLAU	IGKV1-13	PLXNC1
IL1B	PSME2	IGHG4
PAEP	SCN4B	SECTM1
HJV	IFITM3P2	IGHV6-1
MUC5AC	CD2	IL3RA
OBP2A	MS4A6A	IGKV2D-29
PLTP	RNF128	TAP1
MX1	BST2	HLA-DRB1
DDX58	TNFRSF4	IGHV1-45
IFNL1	IGLV9-49	ROBO1
IRF3	SERPINB9	IGKV1D-8
SFTPA2	ALDH3A1	CXCL10
LPA	CCL22	HLA-E
LBP	AKNA	IGHM
RBP4	SLC35G1	MSR1
NOX4	ARHGEF6	TRBV19
LTF	PML	LTB
IFNB1	BTN3A1	IGKV3-7
RBP5	PYCR1	IGHG2
FABP7	IGHV3-33	IGHV1-18
FABP5	NCF1C	IRF1
FABP3	PINLYP	FYN
FABP2	SMTNL1	ACKR4
FABP4	IGKV2D-40	IGKV1D-42
R3HDML	GNG2	MAP3K14
BPIFA3	LINC01752	NGF
BPIFB1	GIMAP2	DUOX2
OASL	SPDYC	CCL24
CRABP2	IGKV2D-28	HLA-C
CRABP1	CD96	CCL13
RBP7	IGKV1D-12	FCER1G
DUOX1	COL14A1	CSF1
OBP2B	IGFBP2	IGLV3-25
RBP2	MAN1A1	IGHA1
LCN15	IL15RA	IGHV2-26
CETP	ELFN1	CD1A
FABP12	UCHL1	IL7R
FABP9	PDCD1	IGHV3-30
BPIFA1	PKDCC	IGLV4-69
LCNL1	HLA-DPB1	CHP2
C8G	GLB1L2	IGKV1-8
SPAG11A	GSTA4	APOBEC3G
PI15	MX1	IGHV3-74
NOX1	GSTA9P	CYBB
PMP2	C1R	ADA2
APOD	TASL	CMKLR1
ORM2	IGHV3-47	IGHV4-28
ORM1	DCUN1D5	IGKV3-20
TNF	CTSS	TEK
CTSG	P2RX7	HLA-DOB
PRTN3	CMPK2	IL2RB
MAPK1	SDS	IGLV3-12
PML	IGHV1-3	CTSG
AEN	MUC21	CTLA4
CYBB	NFAM1	IGKV1-33
BPIFA2	STAT4	NR1H3
ISG20	HLA-F	LTF
BCL3	ABCA3	IGKV3D-15
ISG20L2	LAG3	IGLV1-40
NOX5	PLAC1	GBP2
NOX3	CARD18	IGHV4-59
DUOX2	IKZF1	IGHV1-46
TLR3	ITGB7	IL10RA
TFRC	JAM2	OASL
IFIH1	MIR200CHG
LRP1	CERKL
TRIM5	EGFR
IDO1	CLEC3B
GDF15	PLEK
NEDD4	CXCR6
ADIPOQ	AC138207.5
STAT3	IGKV1D-39
STAT1	RAB6B
IFNL2	EVI2B
SOCS3	MS4A4A
SEMG1	LCK
TNFSF10	S100B
CCL20	IGLV2-11
SOCS1	C5AR1
RNASEL	IGHV1OR15-9
IRF1	MEX3A
IL15	PTPN7
APOBEC3F	MSLN
PLAAT4	LCP1
CHIT1	FMOD
CD40	IGLVI-70
TLR7	OSGIN1
PPIA	RCSD1
ZYX	PTPRC
NLRX1	NMRAL2P
PGC	IGHD3-9
VEGFA	N4BP2L1
IKBKE	MGAT4A
ISG15	CLEC2B
DHX58	GGTA1
TNFAIP3	GNLY
TFR2	CYCSP6
FCN2	LCP2
MUC4	SAMD9L
F2R	IGHV3-63
ELN	IRF7
IL27	PYGM
MAPT	UPK1B
LYZ	RNASE10
CCL5	IGKV3OR2-268
LEP	IGKV1-9
CYLD	APOBEC3D
KLKB1	LILRB1
CST4	LINC01133
CSRP1	CST7
MAPK14	DGUOK-AS1
JUN	C1QA
ITGAV	LGI3
IRF5	SLC7A8
CCR6	IGKV2OR22-4
IL12B	NFATC2
TLR8	CSF3R
GNLY	BCHE
CD81	CCL8
EIF2AK2	KCNJ2
APOM	CD86
CACYBP	KRT24
NOD1	PDK4
MAPK8	IL2RG
MAPK3	NUPR2
BST2	CD72
BPHL	IGHV3-13
PLA2G2A	HLA-DQA1
GRN	RAB42
NEWENTRY	TNFSF10
PDGFRA	CPA3
GNAI1	AL645929.1
WNT5A	ITGAX
FURIN	EIF4E3
ADAR	AC026412.1
TYK2	TKTL1
NOS2	FCER1A
TRAF3	SEC61G
TPT1	ISG15
TPM2	ACKR1
NEO1	TAGAP
AHNAK	CD79A
TLR1	COA6-AS1
TK2	ENPP2
PRDX2	CD209
MX2	AC064836.2
FGF2	RAC3
FGA	IGLV10-54
TCF7L2	PRSS3
F2RL1	SERPING1
TKFC	B4GALNT4
MSR1	AC007991.2
NFKBIZ	IGHV2-70
LMBR1	OAS1
EPPIN	ICAM2
SRC	IL36B
MPO	MIR8071-1
ELAVL1	UCP2
ROBO3	CISH
SP1	IGKV1OR2-108
SOD1	SLC6A2
PDF	SAMD12
DLL4	IFITM1
ECD	PSMB8
SLC11A1	IGHV3-38
DMBT1	TNFRSF13C
STING1	IGLV3-1
SKIV2L	IGHV2-70D
SEMG2	IGHV3-20
DES	FERMT3
DCK	FAS
DAXX	TNFSF13B
TNFRSF10A	AL118508.1
TNFRSF10B	PLA2G4A
EED	IGHV3-21
CCL4	TPPP
LIMS1	CHRDL1
LALBA	SELL
APOBEC3H	IGHV1-58
TMPRSS6	ADRA2A
SPINK5	IGLV2-34
MARCO	SLAMF6
BECN1	PRELP
TNFSF11	LINC01871
KNG1	FDCSP
CSK	MSI1
KLRK1	DOCK10
KCNH2	IGHJ3P
JUND	APLNR
JAK1	AC007785.1
CLDN4	NOS2
CCL28	SLC40A1
RNASE3	HMGA2
RN7SL1	LINC02446
IRF7	VGLL1
IREB2	CXCR3
ILK	FAM78A
IL18	TRIM22
IL17A	DPYD
LTB4R	IGLJ2
APOBEC3A	NMB
MASP2	MS4A1
TRIM27	UGT1A10
RELA	TNFRSF9
IL7R	BTN3A2
IL1A	PLEKHO2
PTX3	CABYR
IFNAR2	GIMAP6
IFN1@	IL12RB2
SYTL1	GJA5
APOBEC3C	PLCL2
DDX17	AKR1C3
PTGS2	AMPD1
HTR1A	JCHAIN
SEPTIN7	IGKV3D-20
CD40LG	ITGA9
CD14	IGLV1-51
MASP1	NCF4
PROC	OSM
MAP2K2	PARP10
MAP2K1	STAB1
HRG	SCARF1
NDRG1	XIRP1
IRF9	RASSF2
TRIM22	ST6GAL1
LANCL1	AC245884.12
PPP4C	SLC16A5
HMOX1	HLA-B
HMGB1	LY86
RNASE7	PSME2P1
ABCC4	IL21R
HGF	CD5
HDAC1	CH25H
IFNLR1	MMP25
PLSCR1	STAT1
BACH2	IGHV1-69D
TANK	APOC1
PIK3CG	FKBP9P1
ARRB1	CCR4
RSAD2	SIGLEC10
STAB2	IGLC3
TBK1	ARG1
PDYN	SLC7A11
PDGFRB	SOSTDC1
PDCD1	IGKV1-27
PCSK2	ARHGAP26
PCSK1	INPP5D
ARG2	CSF2RB
AQP9	MCOLN2
FASLG	GLIPR2
APOH	IGLV1-36
BIRC5	DOCK2
ANXA6	IGKV4-1
IL22	FOXP3
VTN	BATF
VIM	IGKV1-39
VCAM1	IL2RA
PRDX1	BTN2A2
GFAP	SH2D3C
GBP2	TDO2
ALB	CLEC2D
SLC29A3	MAP4K1
OAS1	ARHGAP45
AGER	CD3D
UNC93B1	AC093278.2
TNFSF4	IGLV3-16
NOS1	RNF213
ACTG1	SUSD3
ACTA1	FBLN5
ACO1	LGALS2
SERPINA3	TRBV7-9
CXCR1	HLA-J
CCL15	AC019080.4
CCL14	EPSTI1
CCL16	AC124067.2
CCL19	KRT9
CCL18	PLA2G7
CCL17	SP140
CCL26	IGHJ1
CCL22	TMEM229B
CCR3	NR5A1
CCL4L1	FGD5
ACKR2	WIPF1
CCR7	GBP5
CCL27	IDO1
CCR8	IGSF6
ACKR4	IGHV1OR21-1
CCL2	GMFG
CCL21	FGL2
CCL7	IGHV3-23
CCL3	KCTD14
CCL11	MLF1
CCR5	ZBP1
CCL23	ENO2
CCL25	PLA2G4C
CCL3L3	CCL3
CCL4L2	IGLV2-23
CCL3L1	ITGB2
CCR1	CCDC69
CCL24	PLAAT4
XCL2	ODC1
CXCR4	TAP2
CXCR6	IGLV3-10
CCR4	C1QTNF12
TAFA5	IGKV2-30
TAFA3	TRAC
TAFA4	CNTN1
TAFA1	TAF5LP1
TAFA2	SNX20
CCL15-CCL14	TRIM69
PTK2B	ACY3
IL4	SPRR4
CDH1	IGHV1-2
LTBP1	HSD11B1
IL13	PRR16
IL10	AL031058.1
IL2	C16orf54
PPARG	APOL4
FGR	TRBV20-1
MIF	LY6E
CRP	CASQ1
JAK2	TNFRSF1B
PTK2	SLC2A5
PTGDR	NR4A3
CD86	VPREB3
HCK	NCKAP1L
VDR	IGKV2-28
OLR1	SLC34A2
GRK2	AIF1
TXK	AC103563.1
RNASE2	IL4I1
CD79A	NAP1L2
CD79B	FGF19
LYN	WNT3
SYK	ZDHHC11B
BTK	BIN2
BLNK	CALB2
VAV3	AL390198.1
VAV1	UPK3B
VAV2	IGLV5-45
RAC1	AC114956.1
RAC2	TRPV2
RAC3	TRDC
PPP3CA	IGFL3
PPP3CB	PREX1
PPP3CC	ARHGAP25
CHP1	RND1
PPP3R1	B2M
PPP3R2	RHBDL1
CHP2	ARTN
NFAT5	IFIT1
NFATC1	IGHV3OR16-9
NFATC2	FLI1
NFATC3	USP18
NFATC4	HLA-DPA1
HRAS	HLA-DQB1
KRAS	GIMAP8
NRAS	IGHV3-48
FOS	RBP5
CARD11	IGLV3-19
BCL10	ACSL5
MALT1	APOBR
CHUK	ZEB2
IKBKB	HLA-DQA2
IKBKG	KLHDC7B
NFKBIA	C1orf162
NFKBIB	IGKV1D-13
NFKBIE	CYTH4
CD19	OTOP3
CR2	IGHA2
PIK3R5	IRX4-AS1
PIK3R1	FBXO6
PIK3R2	FCGR2A
PIK3R3	CD14
PIK3CA	IGLV1-47
PIK3CB	IGLV4-60
PIK3CD	CD48
AKT3	CD37
AKT1	IGKV2D-24
AKT2	PCED1B
GSK3B	TRBJ2-3
INPP5D	APOBEC3A
CD22	FASLG
CD72	GLI2
PTPN6	SPIB
LILRB3	PSMB10
FCGR2B	LINC02195
RASGRP3	DNAJC19P5
PLCG2	MAGEA3
PRKCB	SYNPO2
IFITM1	HLA-L
IGH	CCR7
IGHA1	IGKV1-5
IGHA2	ADAMDEC1
IGHD	ITM2A
IGHD1-1	ISG20
IGHD1-14	CASP10
IGHD1-20	IGHG3
IGHD1-26	AC122685.1
IGHD1-7	SP110
IGHD2-15	IQGAP2
IGHD2-2	IGHV1-67
IGHD2-21	CXCL13
IGHD2-8	IGLV2-14
IGHD3-10	AKR1C1
IGHD3-16	CD163
IGHD3-22	CELF2
IGHD3-3	FIBCD1
IGHD3-9	UNC5B-AS1
IGHD4-11	LINC02582
IGHD4-17	CD6
IGHD4-23	NPW
IGHD4-4	IGKV1D-17
IGHD5-12	CD8B
IGHD5-18	IGKV1-12
IGHD5-24	PIK3AP1
IGHD5-5	TNFRSF17
IGHD6-13	GLI1
IGHD6-19	BCL2L10
IGHD6-25	APOL1
IGHD6-6	AL671277.1
IGHD7-27	IGHV3-41
IGHE	THEMIS2
IGHG1	AL512363.1
IGHG2	AMN
IGHG3	TNFRSF14
IGHG4	ASNS
IGHJ1	IL18BP
IGHJ2	SAA2-SAA4
IGHJ3	SAMSN1
IGHJ4	RASSF4
IGHJ5	TAPBPL
IGHJ6	PARP8
IGHM	GTF2IRD2P1
IGHV1-18	IGLV3-21
IGHV1-2	TCIM
IGHV1-24	IGKV5-2
IGHV1-3	MGP
IGHV1-45	CCL4
IGHV1-46	JAK2
IGHV1-58	GPR15
IGHV1-69	DUOXA2
IGHV1-8	PTHLH
IGHV1-38-4	RGS1
IGHV1-69-2	SLA2
IGHV2-26	AC007906.2
IGHV2-5	PLCXD2
IGHV2-70	CXCR4
IGHV3-11	PRF1
IGHV3-13	UGT1A7
IGHV3-15	TIGIT
IGHV3-16	ADGRE2
IGHV3-20	SH3BP5
IGHV3-21	RNU6-8
IGHV3-23	MAGEA6
IGHV3-30	RARRES1
IGHV3-30-3	CCNJL
IGHV3-30-5	C1orf68
IGHV3-33	FMO3
IGHV3-35	CARD16
IGHV3-38	GIMAP4
IGHV3-43	MILR1
IGHV3-48	PIK3R5
IGHV3-49	CCL19
IGHV3-53	IGKV1-6
IGHV3-64	MPP1
IGHV3-66	AL590617.2
IGHV3-7	SMIM22
IGHV3-72	FGR
IGHV3-73	POU2F2
IGHV3-74	AQP1
IGHV3-9	TCN2
IGHV3-38-3	ACE
IGHV3-69-1	AC124852.1
IGHV4-28	KIT
IGHV4-30-1	AC011374.1
IGHV4-30-2	PRKAR1B-AS1
IGHV4-30-4	SELPLG
IGHV4-31	ATP6V1C2
IGHV4-34	GPSM3
IGHV4-39	IGHV4-34
IGHV4-4	ZNF683
IGHV4-59	IL12RB1
IGHV4-61	AC022034.1
IGHV4-38-2	GPR132
IGHV5-51	CPVL
IGHV5-10-1	AC073365.1
IGHV6-1	GPR171
IGHV7-4-1	DANCR
IGHV7-81	CHI3L2
IGK	ABI3
IGKC	AC245297.1
IGKDEL	IGHV3-52
IGKJ	SAA2
IGKJ1	HLA-H
IGKJ2	MGST1
IGKJ3	ITGAL
IGKJ4	FMNL1
IGKJ5	GBP1
IGKV@	AC010168.1
IGKV1-12	FAM20A
IGKV1-13	TPSB2
IGKV1-16	LPL
IGKV1-17	CD1C
IGKV1-27	IGLV2-18
IGKV1-33	OTULINL
IGKV1-37	STAT5A
IGKV1-39	LINC01629
IGKV1-5	CCL4L2
IGKV1-6	B4GALNT3
IGKV1-8	APOL2
IGKV1-9	MX2
IGKV1D-12	LINC00519
IGKV1D-13	CYRIA
IGKV1D-16	CCL3L3
IGKV1D-17	LAPTM5
IGKV1D-33	DOCK8
IGKV1D-37	AKR1C2
IGKV1D-39	CIITA
IGKV1D-42	OLFML1
IGKV1D-43	IGLC6
IGKV1D-8	ALDOC
IGKV2-24	IGKJ5
IGKV2-28	IGHV3OR16-13
IGKV2-30	SAMHD1
IGKV2-40	CD200
IGKV2D-24	APOE
IGKV2D-28	IGLV2-28
IGKV2D-29	GBP4
IGKV2D-30	PDZRN3
IGKV2D-40	IGHV4-39
IGKV3-11	LYZ
IGKV3-15	MRC1
IGKV3-20	MMP12
IGKV3-7	CD300LF
IGKV3D-11	EBI3
IGKV3D-15	MLKL
IGKV3D-20	FAM107B
IGKV3D-7	IGHV3-64
IGKV4-1	HERC5
IGKV5-2	GZMB
IGKV6-21	CYP4F11
IGKV6D-21	IFI44L
IGKV6D-41	AP002387.1
IGL	IFI35
IGLC1	PSPC1P1
IGLC2	CYP2W1
IGLC3	IGKV1D-16
IGLC6	ANXA6
IGLC7	FMO2
IGLJ	SPOCK2
IGLJ1	LILRB2
IGLJ2	IFFO1
IGLJ3	UBA7
IGLJ4	LAIR1
IGLJ5	ADGRE5
IGLJ6	ABI3BP
IGLJ7	IGLC7
IGLV@	IGHV3-72
IGLV1-36	CD27
IGLV1-40	KRT79
IGLV1-44	CFH
IGLV1-47	BX470102.1
IGLV1-50	OR2I1P
IGLV1-51	TLR4
IGLV10-54	CSF2RA
IGLV11-55	LINC01980
IGLV2-11	CLIC2
IGLV2-14	AIM2
IGLV2-18	IL18R1
IGLV2-23	FCGR3A
IGLV2-33	NKG7
IGLV2-8	IGLV1-50
IGLV3-1	RAMP3
IGLV3-10	GNG8
IGLV3-12	IGKV1-16
IGLV3-16	CCL21
IGLV3-19	IGKV6-21
IGLV3-21	AC034105.1
IGLV3-22	LILRA5
IGLV3-25	ERAP1
IGLV3-27	PARP9
IGLV3-32	IGHV3-71
IGLV3-9	AC103563.3
IGLV4-3	ABAT
IGLV4-60	EVI2A
IGLV4-69	ELOBP2
IGLV5-37	PKIA
IGLV5-39	GPX2
IGLV5-45	TRBJ2-1
IGLV5-48	DPT
IGLV5-52	IGLV5-37
IGLV6-57	KRT84
IGLV7-43	IFI44
IGLV7-46	C1QC
IGLV8-61	NAPSB
IGLV9-49	LPXN
C3	AC105460.1
C5	TCHH
CCL3P1	AC023157.2
CKLF	CD53
CMA1	AL033397.1
CX3CL1	CD247
CXCL17	DAPL1
CCN1	IFITM3
EDN1	FNBP1
EDN2	VCAM1
EDN3	IGHV4-4
FGF10	HAPLN3
LECT2	LINC02154
PPBPP1	DOK2
PROK2	STC2
SAA1	IGHV3-53
SAA2	STAT2
SBDS	CRIP1
SEMA3A	GZMH
SEMA3B	IGHV5-51
SEMA3C	EMB
SEMA3D	DUSP9
SEMA3E	HKDC1
SEMA3F	HLA-DMA
SEMA3G	H19
SEMA4A	GS1-124K5.4
SEMA4B	AC018695.6
SEMA4C	GLDC
SEMA4D	RTP4
SEMA4F	CPNE5
SEMA4G	RAC2
SEMA5A	IGHV3-35
SEMA5B	GBP3
SEMA6A	PNLDC1
SEMA6B	IGKV2-24
SEMA6C	TMEM140
SEMA6D	SEPTIN6
SEMA7A	ARHGDIB
SLIT1	ICAM3
SLIT2	LINC01315
TNC	AF274858.1
TYMP	BAALC
C5AR1	NPR3
CCR9	CYP4X1
CCRL2	PTGS2
CMKLR1	P2RY8
CX3CR1	MNDA
CXCR3	TLR3
CXCR5	LINC01705
ACKR3	AC073957.1
CYSLTR1	FCMR
CYSLTR2	MEI1
ACKR1	TXLNB
EDNRA	AC023906.2
EDNRB	ARHGAP18
FPR1	IGLV7-43
FPR2	ID2
GPR17	IGKV1OR22-1
GPR32	RASGRP1
GPR33	LGALS9
PTGDR2	SLAMF8
C5AR2	NRROS
CXCR2	DRAM1
LTB4R2	HSH2D
PLAUR	IGLV1-44
PLXNA1	SRGN
PLXNA2	IGKV3-15
PLXNA3	GZMA
PLXNA4	LINC01322
PLXNB1	GAST
PLXNB2	CCL5
PLXNB3	IGHV1-24
PLXNC1	SPI1
PLXND1	HLA-DOA
PTAFR	UGT1A6
ROBO1	KLRB1
ROBO2	BTK
RXFP3	IGHV2-5
XCR1	STAC3
ADM	CHODL
ADM2	IGKV3D-11
AGRP	HLA-DQB1-AS1
AGT	TLR1
AMBN	GALM
AMELX	SMARCA2
AMH	AC142381.1
ANGPTL5	PLXNC1
ANGPTL7	CORO1A
APLN	DYNAP
AREG	IGHG4
MANF	TCF7
CDNF	FCGR1A
ARTN	LAP3
AVP	RNASE6
BDNF	CYP26A1
BMP1	PEG10
BMP10	SYT11
BMP15	SLCO2B1
BMP2	FGD3
BMP3	SECTM1
BMP4	CDR2L
BMP5	RIPOR2
BMP6	IGHV6-1
BMP7	CD52
BMP8A	IL3RA
BMP8B	IGKV2D-29
BTC	PTPRJ
MYDGF	TMEM119
CALCA	TAP1
CALCB	LIMD2
CAT	MZB1
CCK	APOL3
CD320	PPP1R1B
CD70	HNRNPA1P21
ADA2	C1QB
CER1	AL161431.1
CGA	HLA-DRB1
CGB3	CASP1
CGB1	RUNX3
CGB2	ENTPD1
CGB5	IGHV1-45
CGB7	LTO1
CGB8	SERPINB4
CHGA	PARVG
CHGB	ANKRD39
CLCF1	HAP1
CLEC11A	RAP1GAP
CMTM1	TXNIP
CMTM2	LRRC25
CMTM3	COL4A6
CMTM4	SIGLEC12
CMTM5	ROBO1
CMTM6	TRIM21
CMTM7	IGKV1D-8
CMTM8	SDSL
CNTF	CXCL10
CORT	F13A1
CRH	LAT2
CSF1	PYY2
CSF2	HLA-E
CSF3	IGHM
CSH1	OAS2
CSH2	MSR1
CSHL1	SELE
CSPG5	FYB1
CTF1	TRBV19
CCN2	LTB
DKK1	RGS5
EBI3	IGKV3-7
EGF	IGHG2
EPGN	IGHV1-18
EPO	IGHV3OR16-8
EREG	AC025575.2
ESM1	IRF1
FAM3B	FYN
FAM3C	ACKR4
FAM3D	IGKV1D-42
FGF1	VSIG4
FGF11	MAP3K14
FGF12	USP30-AS1
FGF13	NGF
FGF14	DUOX2
FGF16	CCL24
FGF17	PODN
FGF18	HLA-C
FGF19	MAGEA10
FGF20	AC113346.1
FGF21	CFB
FGF22	CCL13
FGF23	SIRPG
FGF3	DOK1
FGF4	FCER1G
FGF5	CSF1
FGF6	GZMK
FGF7	UBD
FGF8	BTN3A3
FGF9	CD7
VEGFD	ETV7
FIGNL2	IGKV1D-27
FLT3LG	SPN
FSHB	IGLV3-25
GAL	IGHA1
GALP	IGHV2-26
GAST	MRAP2
GCG	GIMAP7
GDF1	IGKV2-29
GDF10	TMEM176A
GDF11	CD1A
GDF2	PSME2P2
GDF3	UCA1
GDF5	SLC22A20P
GDF6	IL7R
GDF7	KLK1
GDF9	IGHV3-30
GDNF	CLDN23
GH1	TSPAN11
GH2	IGLV4-69
GHRH	MYO1F
GHRL	CHP2
GIP	IGKV1-8
GKN1	GZMM
GMFB	APOBEC3G
GMFG	IGHV3-74
GNRH1	PDCD1LG2
GNRH2	GSTM3
GPHA2	TNIP3
GPHB5	RASAL3
GPI	BCL2A1
GREM1	CYBB
GREM2	CKB
GRP	ADA2
GUCA2A	SLA
HBEGF	SLC29A4
HDGF	GPRC5D
HDGFL3	CMKLR1
IAPP	IGHV4-28
IFNE	CRNN
IFNK	SIT1
IFNW1	IGKV3-20
IGF1	TMEM63C
IGF2	SPTSSB
IL11	SIGLEC14
IL12A	TEK
IL16	TRAF1
IL17B	ARHGAP30
IL17C	SLAMF7
IL17D	IGHV4-55
IL17F	HLA-DOB
IL19	GPR183
IL1F10	HK3
IL36RN	APBB1IP
IL36A	CEACAM1
IL37	IL2RB
IL36B	PLCB2
IL36G	IGLV3-12
IL1RN	GYPC
IL20	CTSG
IL21	IGHV1-12
IL23A	TBC1D10C
IL24	TENT5C
IL25	TMEM273
IL26	AC010275.1
IFNL3	STX11
IL3	GNG4
IL31	ADAM19
IL32	DERL3
IL33	CTLA4
IL34	NLRC5
IL5	IGKV1-33
IL6ST	NR1H3
IL7	LTF
IL9	PARP14
INHA	TNNT2
INHBA	IGKV3D-15
INHBB	GABRP
INHBC	IGLV1-40
INHBE	GBP2
INS	MOXD1
INS-IGF2	ITGA4
INSL3	IGHV4-59
INSL4	IGHV5-78
INSL5	CD84
INSL6	P2RY13
JAG1	IGHV1-46
JAG2	KLHL6
FGF7P6	LYL1
FGF7P3	LAX1
KITLG	IL10RA
KL	FCGBP
LACRT	IRAK3
LEFTY1	OASL
LEFTY2
LHB
LIF
LRSAM1
LTB
LTBP2
LTBP3
LTBP4
MDK
MIA
MLN
MSTN
NAMPT
NDP
NENF
NGF
NMB
NODAL
CCN3
NPFF
NPPA
NPPB
NPPC
NPY
NRG1
NRG2
NRG3
NRG4
NRTN
NTF3
NTF4
NTS
NUDT6
OGN
OSGIN1
OSM
OSTN
OXT
ENDOU
PDGFA
PDGFB
PDGFC
PDGFD
PDGFRL
PGF
PMCH
PNOC
POMC
PPBPP2
PPY
PRL
PRLH
PROK1
PSPN
PTH
PTH2
PTHLH
PTN
PYY
QRFP
RABEP1
RABEP2
REG1A
RETN
RETNLB
RLN1
RLN2
RLN3
SCG2
SCGB3A1
SCT
AIMP1
SECTM1
SLURP1
SPP1
SST
STC1
STC2
TAC1
TDGF1
TDGF1P3
TG
TGFA
TGFB2
TGFB3
THPO
TNFRSF11B
TNFSF12
TNFSF13
TNFSF13B
TNFSF14
TNFSF15
TNFSF18
TNFSF8
TNFSF9
TOR2A
TRH
TSHB
TSLP
TXLNA
UCN
UCN2
UCN3
UTS2
UTS2B
VEGFB
VEGFC
VGF
VIP
ACVR1B
ACVR1C
ACVR2A
ACVR2B
ACVRL1
ADCYAP1R1
ADIPOR1
ADIPOR2
ADRB1
ADRB2
AGTR1
AGTR2
AMHR2
ANGPT1
ANGPT4
ANGPTL1
ANGPTL2
ANGPTL3
ANGPTL4
ANGPTL6
APLNR
AR
AVPR1A
AVPR1B
AVPR2
BMPR1A
BMPR1B
BMPR2
BRD8
C3AR1
CALCR
CALCRL
CNTFR
CRHR1
CRHR2
CRIM1
CRLF1
CRLF2
CRLF3
CSF1R
CSF2RA
CSF2RB
CSF3R
EGFR
ENG
EPOR
ESR1
ESR2
ESRRA
ESRRB
ESRRG
FGFR1
FGFR2
FGFR3
FGFR4
FGFRL1
FLT1
FLT3
FLT4
FSHR
GALR2
GALR3
GCGR
GHR
GHRHR
GHSR
GIPR
GLP1R
GLP2R
GNRHR
GPER1
HNF4A
HNF4G
HTR3A
HTR3B
HTR3C
HTR3D
HTR3E
IFNGR2
IGF1R
IGF2R
IL10RA
IL10RB
IL11RA
IL12RB1
IL12RB2
IL13RA1
IL13RA2
IL15RA
IL2RB
IL17RA
IL17RB
IL17RC
IL17RD
IL17RE
IL18R1
IL18RAP
IL1R1
IL1R2
IL1RAP
IL1RL1
IL1RL2
IL20RA
IL20RB
IL21R
IL22RA1
IL22RA2
IL23R
IL27RA
IL2RA
IL2RG
IL31RA
IL3RA
IL4R
IL5RA
IL6R
IL9R
INSR
KDR
LEPR
LGR4
LGR5
LGR6
LHCGR
LIFR
LTBR
MC1R
MC2R
MC3R
MC4R
MCHR1
MCHR2
MET
MLNR
MPL
MTNR1A
MTNR1B
NGFR
NMBR
NPR1
NPR3
NR0B1
NR0B2
NR1D1
NR1D2
NR1H2
NR1H3
NR1H4
NR1I2
NR1I3
NR2C1
NR2C2
NR2E1
NR2E3
NR2F1
NR2F2
NR2F6
NR3C1
NR3C2
NR4A1
NR4A2
NR4A3
NR5A1
NR5A2
NR6A1
NRP1
NRP2
OGFR
OPRD1
OPRK1
OPRL1
OPRM1
OSMR
OXTR
PGR
PGRMC2
PPARA
PPARD
PRLHR
PRLR
PTGER1
PTGER2
PTGER3
PTGER4
PTGFR
PTH1R
PTH2R
RARA
RARB
RARG
RORA
RORB
RORC
RXFP1
RXFP2
RXRA
RXRB
RXRG
S1PR1
S1PR2
SCTR
SDC1
SDC2
SDC3
SDC4
SORT1
SSTR1
SSTR2
SSTR5
ST2
TACR1
TEK
TGFBR1
TGFBR2
TGFBR3
THRA
THRB
TIE1
TNFRSF10C
TNFRSF10D
TNFRSF11A
TNFRSF12A
TNFRSF13B
TNFRSF13C
TNFRSF14
TNFRSF17
TNFRSF18
TNFRSF19
TNFRSF1A
TNFRSF1B
TNFRSF21
TNFRSF25
TNFRSF4
TNFRSF6B
TNFRSF8
TNFRSF9
TRHR
TSHR
TUBB3
VIPR1
VIPR2
PTPN11
ICAM2
ITGAL
ITGB2
PAK1
NCR2
TYROBP
LCK
FCGR3A
FCGR3B
NCR1
NCR3
CD247
ZAP70
LCP2
LAT
PLCG1
SH3BP2
FYN
SHC2
SHC4
SHC3
SHC1
GRB2
SOS1
SOS2
ARAF
BRAF
RAF1
HCST
CD48
CD244
PRKCA
PRKCG
SH2D1B
SH2D1A
FAS
GZMB
PRF1
CASP3
BID
CD3D
CD3E
CD3G
PTPRC
ITK
TEC
NCK1
NCK2
GRAP2
PAK2
PAK3
PAK4
PAK6
PAK5
RHOA
CDC42
CD28
ICOS
MAP3K8
MAP3K14
CTLA4
CBLC
CBL
CBLB
CDK4
RASGRP1
PDK1
PRKCQ
TRAC
TRAJ1
TRAJ2
TRAJ3
TRAJ4
TRAJ5
TRAJ6
TRAJ7
TRAJ8
TRAJ9
TRAJ10
TRAJ11
TRAJ12
TRAJ13
TRAJ14
TRAJ15
TRAJ16
TRAJ17
TRAJ18
TRAJ19
TRAJ20
TRAJ21
TRAJ22
TRAJ23
TRAJ24
TRAJ25
TRAJ26
TRAJ27
TRAJ28
TRAJ29
TRAJ30
TRAJ31
TRAJ32
TRAJ33
TRAJ34
TRAJ35
TRAJ36
TRAJ37
TRAJ38
TRAJ39
TRAJ40
TRAJ41
TRAJ42
TRAJ43
TRAJ44
TRAJ45
TRAJ46
TRAJ47
TRAJ48
TRAJ49
TRAJ50
TRAJ52
TRAJ53
TRAJ54
TRAJ56
TRAJ57
TRAJ58
TRAJ59
TRAJ61
TRAV1-1
TRAV1-2
TRAV2
TRAV3
TRAV4
TRAV5
TRAV7
TRAV8-1
TRAV8-2
TRAV8-3
TRAV8-4
TRAV8-6
TRAV8-7
TRAV9-1
TRAV9-2
TRAV10
TRAV12-1
TRAV12-2
TRAV12-3
TRAV13-1
TRAV13-2
TRAV14DV4
TRAV16
TRAV17
TRAV18
TRAV19
TRAV20
TRAV21
TRAV22
TRAV23DV6
TRAV24
TRAV25
TRAV26-1
TRAV26-2
TRAV27
TRAV29DV5
TRAV30
TRAV34
TRAV35
TRAV36DV7
TRAV38-1
TRAV38-2DV8
TRAV39
TRAV40
TRAV41
TRBC1
TRBC2
TRBD1
TRBD2
TRBJ1-1
TRBJ1-2
TRBJ1-3
TRBJ1-4
TRBJ1-5
TRBJ1-6
TRBJ2-1
TRBJ2-2
TRBJ2-3
TRBJ2-4
TRBJ2-5
TRBJ2-6
TRBJ2-7
TRBV2
TRBV3-1
TRBV4-1
TRBV4-2
TRBV4-3
TRBV5-1
TRBV5-4
TRBV5-5
TRBV5-6
TRBV5-7
TRBV5-8
TRBV6-1
TRBV6-2
TRBV6-3
TRBV6-4
TRBV6-5
TRBV6-6
TRBV6-7
TRBV6-8
TRBV6-9
TRBV7-2
TRBV7-3
TRBV7-4
TRBV7-6
TRBV7-7
TRBV7-8
TRBV7-9
TRBV9
TRBV10-1
TRBV10-2
TRBV10-3
TRBV11-1
TRBV11-2
TRBV11-3
TRBV12-3
TRBV12-4
TRBV12-5
TRBV13
TRBV14
TRBV15
TRBV16
TRBV17
TRBV18
TRBV19
TRBV20-1
TRBV24-1
TRBV25-1
TRBV27
TRBV28
TRBV29-1
TRBV30
TRDC
TRDD1
TRDD2
TRDD3
TRDJ1
TRDJ2
TRDJ3
TRDJ4
TRDV1
TRDV2
TRDV3
TRGV9
TRGV8
TRGV5
TRGV4
TRGV3
TRGV2
TRGJP2
TRGJP1
TRGJP
TRGJ2
TRGJ1
TRGC2
TRGC1
TRAV6

## Sheet: Supplementary Table 8
Supplementary Table 8. Genes in the black module of WGCNA.
ATP2C2
ALOX5
AC104126.1
PALD1
LRMDA
GLRX3
TMEM176B
LMO2
PAX1
SGTB
VLDLR
CD3G
CDIP1
IL17RC
AC008663.1
ARHGAP15
HLA-DPB2
AL731567.1
ITPR1
MARCKSL1
HAVCR2
RAB39B
TNFSF4
RASGEF1B
GSTK1
LINC02084
BCL2
AREG
FAM78B
P2RY10
TRBV4-2
TRBV6-6
SERPINB9P1
HSD17B14
CCR5
ABCA7
PSTPIP1
AK4
LINC02541
AL589986.2
ICAM1
PDE4B
BTG1
RSPO3
GNGT2
TAPBP
RNASE1
TRBV11-2
MICB
TRBV5-1
LMF1
GCSAM
AQP9
CEP250-AS1
CMTM2
AC093890.1
AC002091.1
SH2D1B
PAOX
FATE1
NHLRC4
RGS19
ST8SIA1
CYB561A3
TESC
P2RY12
RASGRP3
PDK3
BFSP1
PKN1
LILRB4
SYTL3
C1S
SH2D2A
TNFSF8
AGAP2
JAML
CRTAM
AL022316.1
IQSEC1
RFTN1
AC091182.2
ALDH16A1
HLA-DQB2
CYSLTR2
CX3CR1
ZNF671
INPP1
SLC18A2
AC016957.2
ADAM28
TRAT1
CTSW
HNMT
MDFIC
AC083862.1
CYP2U1
THEMIS
ARHGEF1
SLCO4A1
NLRP3
CARD8-AS1
NFKBIE
TRGV10
HHEX
ASGR1
RASGRP4
IL10RB-DT
FCRL3
AC104653.1
NPM1P25
LILRB5
NCOA7
AC009275.1
AC006262.2
SLC25A45
SH2B3
SLC1A3
FGFBP1
TTC7A
ARHGAP9
MIR5195
SARDH
FCRL6
SLC2A1
OSCAR
ABCG1
PHTF1
CSF1R
VAV1
ALOX5AP
CFAP251
ATP6V0E2
TRBJ2-2
HCST
MOB3A
AC060766.4
SLAIN1
F2RL1
ADGRG3
ASGR2
TNFSF14
SEPTIN1
SNX10
S1PR4
HSPA1L
TRBV6-5
PSMB8-AS1
YKT6
TRIL
S1PR2
DHRSX
C7
FCGR2B
CD3E
MYO7A
RGS14
SRR
IL32
SNAI3
AC004585.1
APOBEC3H
HDAC7
SPP1
GAA
TCF25
RDH11
MS4A14
GFI1
GABARAP
CCR2
CD274
WAS
MIR4539
TLE2
RIN3
MDK
TRBC2
AC005256.1
HLA-DRB5
NIP7
DTX2
TRBC1
GNB4
CCL2
SNX22
ASAH1
TMC8
HVCN1
CCR1
FOLR2
CKS1BP1
ICOS
MPEG1
IL16
CCDC71L
TPSAB1
CD69
PLD3
CXCR2P1
CCDC125
PLEKHA2
PSMG3-AS1
CTSO
CD68
NICN1
RINL
NFKBID
HCLS1
PDE4D
IPCEF1
FPR3
FPR1
PCAT6
RAB33A
CEP85L
IL7
SIGIRR
HLA-DRB6
AC068831.5
PLA2G2D
HLA-DRA
RTKN
GATA3
DGKZ
MAN1C1
ADCYAP1
TRBV29-1
AC060766.3
SASH3
TMEM170B
PTAFR
ERFL
RELB
TMEM175
HAMP
TNIK
SHISAL2A
CD19
MADD
PPP1R1C
CR2
PTGDS
PFKFB2
BLK
CD83
CX3CL1
TRBV9
ZAP70
IFI30
BNIP3
AC015911.3
CLEC1A
PCED1B-AS1
IL1RL2
GFRA2
CREM
AOAH
LINC01150
SLAMF9
GIMAP1
TRAV13-1
ELN-AS1
NAALADL1
GPR65
KLRC1
TRAF5
LINC00964
VAMP5
LILRA4
ACAP1
SESN1
RNF125
ATP6V0E2-AS1
SLC7A5
VMO1
NFKB2
BCL3
PLCB3
LINC00640
DNASE1L3
ARG2
TRBV2
PSMD7
CYP1B1
KHDC1L
CALHM6
PRKAR2B
AC090948.2
TRAV39
KCND1
PDE6G
MS4A7
NAA20
EXOC3L4
G2E3-AS1
GPRIN3
CD8B2
SLC11A1
VSIR
SH3KBP1
AC133644.1
NOD1
FCN3
AC040169.3
CFLAR
PLCD3
MAX
PTGIR
RABGEF1
AL023653.1
AC093627.4
EPB41L4B
RNF114
PILRA
RPS16P2
NFATC1
RNF150
MCEMP1
HCK
TMC7
IL17REL
GPR34
SKAP1
TNFSF12
CLEC10A
AC025171.1
CCL18
CADM4
PTCRA
TREM2
GPR25
TRBV12-3
TUFT1
ADAM22
FPR2
PYGL
PAQR8
SELENOP
ARHGEF10L
AC004687.1
MS4A2
LINC01857
IL33
AC027097.2
GAL3ST4
MARCO
RAB29
PPM1K
SLC7A7
CYFIP2
SUCNR1
IL22RA2
SIGLEC8
PRKCB
TRAV8-3
DOK3
PLGRKT
TRBV12-4
ATP2A3
ICA1
EOMES
CD4
AL358334.2
TNFAIP8L2
FRZB
C3AR1
ARRDC2
LRRK2
PTPN22
PARM1
TNFAIP8
RUFY4
RHOH
AL390778.2
LGI2
TM4SF19
NCF2
RENBP
SH2D1A
TWF2
CD79B
DLX2
ARL4D
CYP27A1
GDPD2
GAPT
AC008556.1
AL391056.1
HEIH
ERAP2
TRBJ2-4
MYOSLID
C2
VPS37B
IFITM2
S100A4
POU6F1
PSTPIP2
MLLT3
CD40
INF2
NCF1
AC008011.2
NSMF
KCNK13
LRRC75A
TRBV4-1
ST8SIA4
RNPEPL1
GOLM1
LAIR2
EIF3B
TNFRSF14-AS1
TOX
GPR153
RAP1A
KEL
HLA-DMB
LACC1
CD300E
ENPP4
PAX5
AC007611.1
PELATON
PPP3CC
PPP1R16B
C3
IKZF3
FCGR1CP
C19orf38
MGAT3
BLNK
CYTIP
CD300C
IGFL2-AS1
P2RY6
MAP3K3
BATF3
PRKD2
SIGLEC1
SNAPC1
CD74
ITGAM
COL4A4
LY96
ANKRD44
CD8A
RILP
AL671277.2
TYROBP
TNFRSF11A
AC040970.1
ABR
CHIT1
TMEM62
TBXAS1
PRKCZ
IL18RAP
CD300A
ARHGAP5-AS1
GUCD1
CLEC5A
TRBV28
KCNMB1
MSRA
AC244153.1
ITGAE
CLEC4A
TMIGD2
JAK3
NLRC3
LINC01480
IRF8
LST1
ADARB2
TRBJ2-7
VASH1
GLRX
EPB41L2
RBPJ
FLJ42969
EMILIN2
MBP
LINC02416
AC090948.3
USH1G
FRMD4A
NRGN
CD2
MS4A6A
GP1BA
RNF128
AP001542.3
C4B
ZBED6CL
PLEKHO1
AL359076.1
TNFRSF4
SERPINB9
LINC01094
KLRD1
HS3ST4
CCL22
AKNA
CLEC4G
ARHGEF6
HLA-DRB9
AC010186.2
B3GNT7
TFEB
GRAMD1B
XCR1
STAP1
NCF1C
TRAV29DV5
TRAV16
GPR84
TP53
GNG2
RGS3
GIMAP2
HILPDA
MARCHF2
TCL1A
GRAMD2B
CD96
AL139351.1
ACP2
GALNT17
CBLN2
POLR3GL
CTSH
MAN1A1
CXorf38
KLF2
PDCD1
PKDCC
HLA-DPB1
ARHGAP20
SNORA59A
C1R
S100A10
MARCHF1
TRBV24-1
CSRNP1
TASL
LHX5
AC010319.1
DCUN1D5
CTSS
AC004847.1
P2RX7
SLC52A3
SDS
GPR55
NOL3
KCNQ1
NFAM1
STAT4
ABCA3
BHLHE22
PTPN6
RBM43
HSPA7
LAG3
VPS9D1-AS1
IKZF1
AC108673.2
AR
TRBV7-6
REM1
AP003774.2
ITGB7
CASP4LP
LSP1
CERKL
ACRBP
PLEK
CCRL2
CXCR6
PLD4
EVI2B
MS4A4A
MAPKAPK2
LCK
AL135786.1
AC090152.1
S100B
C5AR1
EPB41L4A-DT
PTPN7
CYBC1
IL34
ERG28
LCP1
BANK1
RCSD1
PTPRC
CBX7
LINC01943
N4BP2L1
MGAT4A
ARHGAP22
FUT4
GGTA1
GNLY
LINC01215
CYCSP6
LCP2
AC104825.1
EMP3
HESX1
MYCN
AC108134.3
OPRL1
APOBEC3D
LILRB1
SLC39A8
ABCB1
CST7
ZNF331
DGUOK-AS1
AL161785.1
CAMK1
AC018755.4
C1QA
SLC7A8
NFATC2
FNDC11
DTX4
ANXA2R
TLR5
TSPAN32
CITED2
RAB39A
PPP1R18
CSF3R
SDC1
AC036176.1
AC090825.1
DUSP4
RPL7AP64
FES
TMEM106A
CCL8
IGIP
KCNJ2
CD86
SLC27A1
UBASH3A
IRX4
IL2RG
CMAS
AC009318.2
CD72
LINC02345
TECPR1
HLA-DQA1
AC027097.1
ZNF43
PARD3B
HDC
RAB42
GVINP1
ARID5A
ABCD1
NUCB1
CPA3
ITGAX
EIF4E3
CD1E
FCER1A
STK10
PTS
PIP5KL1
TAGAP
AC082651.3
AP001972.5
ENPP2
CD209
TRAV1-2
TNIP1
SERPING1
NAGK
ALDH9A1
AC007991.2
SLFN12
RMND5B
AK3
SETDB2
ICAM2
UCP2
JAZF1
CISH
SDC3
AC092903.2
PTGER4
FBP1
IL9R
LPIN1
PNRC1
ZNF165
TSC22D3
LINC00944
AC023906.5
TLR2
NCR3
CHMP7
FERMT3
SLC6A12
FAS
MIR135A1
AC011477.2
TNFSF13B
RASSF3
FGF1
PLA2G4A
C4A
PTPRN2-AS1
IK
PACSIN1
MED25
PYHIN1
MALT1
SELL
TRAF3IP3
AC133785.1
TNFSF15
ARPC1A
LINC00426
SLAMF6
LINC01871
LINC00958
CAV2
HELB
FP565260.3
AL365361.1
DOCK10
TMEM52B
TM6SF1
GRAP
SLC40A1
STPG1
HMGA2
LINC02446
CXCR3
AC008105.2
FAM78A
DPYD
RRAGD
CNP
NMB
SOCS1
MS4A1
SMOX
TNFRSF9
HTRA4
RORB
BIRC3
AL355803.1
PLEKHO2
TESPA1
PPM1M
ULBP2
GIMAP6
XKR8
CTSD
TNFSF13
PLCL2
ABCA2
MIAT
SIGLEC9
GAB3
ITGA9
IGF2BP2
RAB19
KL
SIAH1
NCF4
PPFIBP2
BX284613.2
OSM
TYRO3
AL645939.3
FCGR2C
FRMD3
KAT2B
STAB1
SH3BGRL
SCARF1
AC010226.1
TRBV7-3
RASSF2
TRBV27
MIR3142HG
LTA
AC245884.12
GUSB
MAST3
AC093726.1
MIR4653
AC008669.1
LY86
ZNF672
LIPA
IL21R
LINC01605
MIR4645
CD5
CH25H
ATG7
RNF217
MMP25
SLC12A7
APOC1
TPP1
VENTX
PTK2B
CCR4
GHDC
CD81
SIGLEC10
PRAM1
ZNF22-AS1
GSTP1
SEMA4D
SPNS3
LINC00518
SERPINA1
ARHGAP26
INPP5D
CLECL1
CSF2RB
MCOLN2
PLAUR
GLIPR2
LDLRAD4
AC027575.2
DOCK2
FOXP3
BATF
IL2RA
BTN2A2
SH2D3C
LRRN3
AL157394.1
CLEC2D
MAP4K1
MEOX1
ARHGAP45
GNAI2
PHC2
CD3D
AC093278.2
TRBV5-4
LYSMD4
ASMTL
AL024508.1
TRAV8-6
GPR35
PLS3
SUSD3
P2RY14
LGALS2
TRBV7-9
GRK3
BAIAP3
NFE2L3
KRT9
PLA2G7
SP140
CMA1
SLC22A4
RAB20
PPP1R14B-AS1
PIK3CD
CARD11
TLR6
ZNF236-DT
TMEM268
TMEM163
ITPRIPL1
WIPF1
SUSD1
TMSB4X
IGSF6
WSCD1
TRAV4
CMTM7
GMFG
MPC1
FGL2
TTC38
IL17RA
RIPOR3
TRPM2
ZBP1
KCNJ5
KLC3
YWHAZ
CCL3
LILRA1
TRAV8-4
ITGB2
RTL5
CCDC69
PROK2
AL353807.3
PLAAT4
ZNF114
PTP4A2
EPB41L3
CARMIL2
TRAV19
ZC3H12D
ALDH3B1
CEACAM4
TRAV22
TRAC
BTD
CREBL2
PTEN
PTGER2
CA12
LINC02605
CD1D
TAF5LP1
SNX20
PIK3R1
PLPP1
CCR8
ACY3
LGMN
TRAV8-2
ETV7-AS1
AC004921.1
EFNB1
FOSL1
HSD11B1
TRGV7
ZMYND15
AL031058.1
C16orf54
RNF166
AL645939.1
APOL4
TRBV20-1
PAG1
TNFRSF1B
PRRG3
SIGLEC7
RAB37
AC002091.2
SOX15
GPBAR1
NTRK1
CCL7
AC008760.2
TRNP1
FAR2
NCKAP1L
AIF1
AL844908.1
ADGRG5
TRAV24
IL4I1
MAP4K4
AL121845.4
DVL1
SLC25A20
BIN2
SEMA7A
JADE1
SLFN12L
SCIMP
CALB2
HLA-W
RIPK2
SIDT1
SMAP2
IL27RA
NAT8B
AC114956.1
TRPV2
DNPEP
TRDC
ANXA2
TRDV1
FRAT1
NTAN1
PREX1
TFEC
TRBV13
DNAJC1
ST6GALNAC6
ARHGAP25
AL139246.3
TMEM178B
ARTN
SMPD1
BCL2L14
FLI1
MARK3
HLA-DPA1
MFSD2A
HLA-DQB1
JAKMIP1
LRRC61
GIMAP8
ODF3B
MFNG
KCNK5
OLR1
TXNDC15
CLDN10
IMPDH1
BTLA
CCDC32
PLCL1
RNF157
IL10
RBP5
GLYCTK
APOBR
HLA-DQA2
KLHDC7B
C1orf162
CD1B
TCEANC
CYTH4
APOBEC3C
CRYBB1
GMIP
IRX4-AS1
FCGR2A
TLR10
CD14
TFAP2E-AS1
TRAFD1
TMEM150C
HS3ST3B1
CD48
CD37
PCED1B
TRBJ2-3
FCGR3B
FASLG
SLC49A3
SPIB
ADGRE1
TMEM51
PHACTR1
TSPAN4
LINC02195
CCDC50
CXCL5
NRIP2
G0S2
CLEC17A
MAN2B1
CCR7
BAIAP2
KMO
KRT86
ADAMDEC1
ITM2A
PLA1A
STK17B
IQGAP2
WDR81
CXCL13
TRAV17
AC090559.1
SLC2A6
IL15
SP5
CD163
LPIN2
CELF2
GCA
AC015819.1
AGFG2
CD207
PSAP
LINC00520
CD6
APOBEC3F
AC145098.1
CD8B
MIR155HG
LILRA2
PIK3AP1
TRBV5-6
DNAJA2
BCL2L10
WDFY1
YPEL1
THEMIS2
TNFRSF14
WDR86-AS1
RGS18
YWHAH
PTPRO
IL18BP
HEXB
HDAC9
SAA2-SAA4
FLT3LG
SAMSN1
PAPLN
RASSF4
NCF1B
TRBV18
DOCK11
UST-AS2
TAPBPL
TLR8
LY6G5C
DENND1C
PARP8
PHLDB2
TRIM38
TMEM159
P2RX5
GTF2IRD2P1
IMPA2
RFX5
FIG4
CCL17
KCNA3
SUGCT
CCL23
TCIM
ATP8A1
AC079921.2
GPAT2
CCL4
TREML2
JAK2
AP000769.1
REEP6
OXER1
AC108136.1
PTHLH
RGS1
SLA2
LY9
FCGRT
PDE10A
AC245128.3
SENCR
CCR5AS
CXCR4
KLRF1
TP73
AL928654.4
FHIT
NADK
HAAO
NAPA
PRF1
ECEL1
RGL1
HEXA
HS3ST2
TIGIT
ADGRE2
STAMBPL1
SH3BP5
CTSE
CLEC12A
BEND5
RARRES1
CLEC7A
PRLR
MSL3
TMBIM4
AC022126.1
CCNJL
NEURL1B
GIMAP4
SLC9A9
SH2B2
MILR1
CYB561D2
PIK3R5
CCL19
RGS9
MPP1
LINC00996
DMXL2
DPYSL2
FGR
HACD4
ATF5
CBLN3
CARD9
POU2F2
AC022706.1
TCN2
ACE
B3GNT4
AC124852.1
NUBP1
KIT
AC133065.3
PRKAR1B-AS1
ARRB2
SELPLG
GPSM3
AL024507.2
ZNF683
DBH-AS1
FAAH2
IL12RB1
GPR132
CYSLTR1
CD33
CPVL
AF064858.2
MTMR14
AL031846.1
TMEM105
CTSZ
FBXO7
GPR171
NTN4
CHI3L2
HIVEP3
AC004067.1
ABI3
TRBV6-1
ITGAL
FMNL1
SATB1
C15orf48
IFITM3P6
UNC93B1
TRGC2
CTSL
SVIP
AC007384.1
FAM20A
TPSB2
VIM-AS1
LIFR
LPL
RNF152
CD1C
ACACB
C2CD2
OTULINL
CASP5
TRAV12-3
STAT5A
CCL4L2
HLA-DPA3
B4GALNT3
TMX4
KIR2DL4
AC109446.2
ZNF438
NLRP3P1
RHOU
CAMK4
CD40LG
CYRIA
PNPLA3
CCL3L3
ITGB2-AS1
LAPTM5
AC010186.3
ORAI2
CEACAM21
DOCK8
TRAV2
LEPROTL1
CIITA
SLC16A1
GNS
IKBKE
CD200
APOE
STING1
TSPAN33
FCN1
LYZ
MRC1
MMP12
CD300LF
TLR7
EBI3
PPP1R14C
ZNF831
TRAV12-1
FAM107B
TATDN2
GZMB
CCND3
SPRYD7
TMPRSS3
CD38
TXK
AC025171.2
CPM
RILPL2
RUNX3-AS1
CFAP20DC
FMO2
PPT2
SPOCK2
KIF21B
LILRB2
CLEC4E
SOD2
IFFO1
NTN1
UBA7
LAIR1
ADGRE5
ZNF101
CRACDL
LYSMD2
LINC00239
EXOC3L1
SIPA1
CD27
IFNG
SYK
ETS1
LINC00324
CFH
COTL1
DSTN
TGM2
OR2I1P
TLR4
CSF2RA
LINC01980
HRH2
CLIC2
IL18R1
FCGR3A
FTH1P22
RNF130
CDC42SE2
C5orf34-AS1
NKG7
LSAMP
WASHC2A
CD180
B4GALT1
C11orf21
RAMP3
GNG8
PRR29
TUSC1
HMOX1
CCL21
DENND2D
TRAV13-2
DEF6
ZBTB46
SLCO2A1
ARHGAP4
CBARP
LILRA5
ARL6IP5
ADM
CD28
LINC01679
ST3GAL5
GPR174
EVI2A
CARD8
SLC19A2
RUBCNL
TRAV20
AC012645.3
TRBJ2-1
HUS1
SLC35A4
FLT3
TMIGD3
C1QC
NAPSB
LPXN
AC105460.1
TRAV14DV4
LINC01914
AC023157.2
CD53
CD247
FNBP1
TRAV27
ADPRH
VCAM1
FLOT2
TBC1D1
KRT17P2
F5
HAPLN3
EVL
DOK2
TRAPPC9
CRIP1
ZFYVE21
NAAA
GZMH
EMB
P2RX4
WDFY2
DUSP9
LINC02323
HKDC1
HLA-DMA
AC021016.1
RNASET2
RTN1
ZNF618
CYLD
SLC43A3
AGPAT3
EDARADD
PIK3R6
GALNT18
AP002954.1
CDH17
NUB1
VRK3
RRAS2
CTSB
RAC2
AL390755.2
TDRD10
SLC46A3
RAB38
ZIK1
TMEM140
RNU4-62P
SEPTIN6
ARHGDIB
ICAM3
LINC01315
RAB8B
NME1-NME2
C7orf57
ARMH1
AC025171.5
TRAV5
AL117336.1
ATP1A3
CYP4X1
ALDH2
SARAF
P2RY8
C16orf74
PRSS12
CXorf65
MNDA
AL133371.2
FCMR
MEI1
ITK
SBNO2
PLAC8
GPR18
DPEP2
AC023906.2
AC008972.2
PTGES3P1
L3MBTL2
ARHGAP18
AC055720.2
RASSF5
ID2
KBTBD8
CTDSP1
CD163L1
RASGRP1
LGALS9
CD244
SLAMF8
NRROS
REEP5
DRAM1
HSH2D
SRGN
SOCAR
GADD45G
GZMA
AKAP5
SLAMF1
TRAV36DV7
CD22
LINC01322
GAST
AC104031.1
ZFPM2-AS1
CCL5
PIK3CG
TRAV10
MICAL1
PATL2
DISP1
TRAV3
DLX2-DT
TRAV23DV6
SPI1
SOX8
HLA-DOA
SSTR2
AC027307.1
TRBV10-3
NECAP2
KLRB1
BTK
KCND3
SFMBT2
LYN
SLC3A2
LINC02535
GID8
SBDS
PGPEP1
CD101
TMEM255A
CXCL16
HLA-DQB1-AS1
ELMO1
GLT1D1
TLR1
GALM
ALPK1
ERO1A
SMARCA2
PLXNC1
FUCA1
SIRPB1
CORO1A
TRG-AS1
CTDP1
GBGT1
TIFAB
SLC35E4
LINC02381
CASS4
SLC43A2
CLSTN3
TCF7
ESR1
FCGR1A
CORO7
RNASE6
TRAV26-2
CYBA
C10orf143
SLC4A3
LINC00852
MXD4
XXYLT1-AS2
AL391834.2
AP003559.1
CYP4V2
DENND3
SLCO2B1
CAPN6
FGD3
TRAV25
IGSF21
SECTM1
TRAV26-1
CDR2L
SLC37A1
RNU6-140P
AL138756.1
GPR82
RIPOR2
LINC00482
CADPS2
CD52
NRG4
KLRG1
TMCO4
ZDHHC9
IL3RA
HTATIP2
CCPG1
PTPRJ
DEPP1
TRAV8-1
AC015911.7
WDFY4
AC006978.1
FSCN1
TRBV15
STAT5B
SMCO4
LIMD2
GPR137B
VNN2
CCDC170
EFHD2
ZFP82
ZBTB32
XCL2
HNRNPA1P21
C1QB
AL161431.1
PIK3IP1
HLA-DRB1
TREML1
RUNX3
AL513123.1
HPS1
GRAP2
NLRC4
AC060766.1
FOXP1
ENTPD1
AL117328.1
MIR223HG
SYNE3
DGLUCY
LINC00649
LBH
AP1B1
PARVG
AC136628.3
AL683807.1
CALHM2
PBXIP1
LIX1L
IGFLR1
MGRN1
MYO1G
CDH23
ZNF710-AS1
TMEM117
DDAH2
LIVAR
TXNIP
HSPA6
PIP4K2A
ZNF467
LRRC25
TRBV14
COL4A6
SIGLEC12
ROBO1
SDSL
EBF3
LAT2
CLBA1
PARP15
MCOLN1
AC243960.1
TRIM8
AC245060.4
MSR1
FYB1
TRBV19
LTB
ADAM8
TBX21
GCH1
LY75
LINC00528
GATA6
LINC00847
CD300LB
ROR1
SLC8A1
MTHFR
GSAP
ARRB1
C1QTNF2
TFAP2E
TMEM131L
SOWAHD
FYN
NAGA
IRF5
TRBV3-1
CYP7B1
AC060766.6
NR3C2
VSIG4
MGAT1
MAP3K14
RNF19B
AZIN2
MERTK
USP30-AS1
CPPED1
NGF
AC046185.3
CD80
IFNAR1
CCL24
IFNAR2
AC080023.1
TMEM150B
SIGLEC15
KANK3
APBA3
HPGDS
CCL13
LITAF
SIRPG
CFI
DOK1
AC139768.1
FCER1G
C2CD4B
CSF1
CDC37L1
GZMK
PDE6B
TMOD2
SH3BP2
NDUFAF3
UBD
VAMP2
SAP30L
TPBGL
ZMAT1
TMEM156
CD7
SPN
SPATA13
RASGRP2
CALM3
LINC00941
CLCF1
TPD52L2
KCNAB2
GIMAP7
FAM53B
SOAT1
CHST13
TMEM176A
CD1A
RAB27A
AC021188.1
KDM8
IL7R
DUSP2
CLDN23
DCSTAMP
PNPLA6
TRAV41
PPP1R3F
MYO1F
CD55
PCGF5
GZMM
APOBEC3G
AL049775.2
PDCD1LG2
TRAV9-2
TTC39C-AS1
PCNPP3
AC022509.2
TMEM220
TNIP3
GPR141
RASAL3
RFX5-AS1
SLC2A1-AS1
LINC02310
SPTSSA
BCL2A1
CYBB
TPSD1
AL162376.1
CKB
ADA2
SLA
DPF1
AL133342.1
CAT
MSMO1
TOMM40L
ETV6
FAM167B
AL135818.1
CMKLR1
SQLE
SLC47A2
SIT1
SV2B
RGS10
IDUA
INSL3
TMEM63C
TRBJ2-2P
MVB12B
SIGLEC14
LIPE
MMAA
CD70
ATP6V0D2
IRF1-AS1
CFP
TRAF1
ARHGAP30
ATP6V1B2
DAPK1
CSK
FUT7
SLAMF7
HLA-DOB
AC090948.1
ADAMTSL5
TYK2
GPR183
HK3
LILRB3
APBB1IP
MRTFA
IL2RB
PLCB2
BMF
NINJ1
GYPC
CTSG
AL590764.1
TRBV30
C1orf54
SHE
TBC1D10C
STS
TMEM273
MYO9B
STX11
IFITM4P
MPHOSPH6
PRKACB
PLPP6
FGD2
ADAM19
ACP5
CTLA4
ZFYVE28
CGNL1
RPL32P20
KRT17P6
SLC16A10
C8orf31
AC099343.2
BHLHE40-AS1
NR1H3
LHFPL2
C2CD2L
SLFN5
LINC00926
TMEM71
GCNT1
AC100854.1
CHST12
TDRD3
TCIRG1
NEURL3
PARP3
MATK
RNASE2
GABRP
AC090970.2
LILRA6
TRAV6
GBP2
RASSF1
MOXD1
ITGA4
AP005264.1
COL23A1
SLC9A7
FCHO1
SLFN11
SIRPB2
CD84
P2RY13
AC107464.2
KCMF1
KLHL6
SELENBP1
LYL1
TRAV12-2
GPRC5A
IL10RA
FCGBP
ATP8B4
SIGLEC17P
SLC29A3
IRAK3
PTPN18
EFNA1
KCTD12
TRAV21
TOMM20P2
CD200R1
ZNF22
LMF2
TNFRSF8
EGOT
